# Supplementary material for: Influence of counterion type on the scattering of a semiflexible polyelectrolyte
Source: Royal Society of Chemistry journal article supplement (doi:10.1039/d4sm00874j), 2024-01-01
Supplement: d4sm00874j1.xlsx [file d4sm00874j1.xlsx]

## Sheet: SANS
Beamline	D11 (ILL)			Beamline	D11 (ILL)			Beamline	D11 (ILL)			Beamline	D11 (ILL)			Beamline	D11 (ILL)		Beamline	D11 (ILL)		Beamline	D11 (ILL)			Beamline	NG30m (NIST)			Beamline	D11 (ILL)			Beamline	D11 (ILL)			Beamline	D11 (ILL)			Beamline	D11 (ILL)			Beamline	D11 (ILL)
c [M]	0.147			c [M]	0.11			c [M]	0.0500094			c [M]	0.01			c [M]	0.02		c [M]	0.03		c [M]	0.0500357			c [M]	0.112741			c [M]	0.147			c [M]	0.147311			c [M]	0.18			c [M]	0.147			c [M]	0.11
solvent	D2O			solvent	D2O			solvent	D2O			solvent	D2O			solvent	D2O		solvent	D2O		solvent	D2O			solvent	D2O			solvent	D2O			solvent	D2O			solvent	D2O			solvent	D2O			solvent	D2O
polymer	LiCMC			polymer	LiCMC			polymer	LiCMC			polymer	NaCMC			polymer	NaCMC		polymer	NaCMC		polymer	NaCMC			polymer	NaCMC			polymer	NaCMC			polymer	NaCMC			polymer	NaCMC			polymer	KCMC			polymer	KCMC
q [Å-1]	I [cm-1]			q [Å-1]	I [cm-1]			q [Å-1]	I [cm-1]			q [Å-1]	I [cm-1]			q [Å-1]	I [cm-1]		q [Å-1]	I [cm-1]		q [Å-1]	I [cm-1]			q [Å-1]	I [cm-1]			q [Å-1]	I [cm-1]			q [Å-1]	I [cm-1]			q [Å-1]	I [cm-1]			q [Å-1]	I [cm-1]			q [Å-1]	I [cm-1]
0.012937	0.27053			0.012937	0.148508			0.014473	0.125913			0.00889649	0.0774423			0.00889649	0.123439		0.00889649	0.142434		0.014473	0.0747898			0.003433	75.62			0.0129323	0.290934			0.014473	0.203338			0.0129323	0.384415			0.0129323	0.264908			0.0129323	0.306938
0.0144588	0.207678			0.0144588	0.123676			0.0151863	0.113509			0.00994307	0.0732407			0.00994307	0.104069		0.00994307	0.117557		0.0151863	0.0720209			0.003837	47.14			0.0144536	0.215933			0.0151863	0.180709			0.0144536	0.276486			0.0144536	0.209508			0.0144536	0.228995
0.0159805	0.16698			0.0159805	0.10704			0.0158996	0.101536			0.0109896	0.0691027			0.0109896	0.0895097		0.0109896	0.0993133		0.0158996	0.0684163			0.004241	27.84			0.0159747	0.165916			0.0158996	0.161947			0.0159747	0.210141			0.0159747	0.170289			0.0159747	0.178781
0.0175022	0.142207			0.0175022	0.0984279			0.0166129	0.0951701			0.0120362	0.0663151			0.0120362	0.0808817		0.0120362	0.0880248		0.0166129	0.0671115			0.004645	18.23			0.0174958	0.140845			0.0166129	0.14931			0.0174958	0.171272			0.0174958	0.146665			0.0174958	0.148061
0.0190238	0.126936			0.0190238	0.0926794			0.0173262	0.0866224			0.0130827	0.0646142			0.0130827	0.0751066		0.0130827	0.0812283		0.0173262	0.0652082			0.005049	12.73			0.0190168	0.120744			0.0173262	0.138027			0.0190168	0.145344			0.0190168	0.130987			0.0190168	0.130139
0.0205452	0.116397			0.0205452	0.0877265			0.0180394	0.0834121			0.0141291	0.0644025			0.0141291	0.0717471		0.0141291	0.0757719		0.0180394	0.0642287			0.005453	9.233			0.0205378	0.108603			0.0180394	0.127788			0.0205378	0.128358			0.0205378	0.118484			0.0205378	0.116955
0.0220666	0.10899			0.0220666	0.085668			0.0187526	0.0808165			0.0151756	0.0625427			0.0151756	0.0686799		0.0151756	0.0732809		0.0187526	0.0643953			0.005857	6.833			0.0220586	0.099576			0.0187526	0.121869			0.0220586	0.115558			0.0220586	0.112141			0.0220586	0.107159
0.0235879	0.10336			0.0235879	0.0833976			0.0194658	0.0766661			0.016222	0.0626618			0.016222	0.0669525		0.016222	0.0705794		0.0194658	0.0619585			0.006261	5.286			0.0235793	0.0931433			0.0194658	0.114957			0.0235793	0.106815			0.0235793	0.105858			0.0235793	0.101863
0.025109	0.0994743			0.025109	0.0830313			0.0201791	0.0745198			0.0172684	0.0626963			0.0172684	0.0670276		0.0172684	0.0695156		0.0201791	0.062852			0.006665	4.237			0.0250999	0.0888469			0.0201791	0.111191			0.0250999	0.101886			0.0250999	0.101414			0.0250999	0.098669
0.0266301	0.0964764			0.0266301	0.0819302			0.0208922	0.0717865			0.0183147	0.0619789			0.0183147	0.0656521		0.0183147	0.0680944		0.0208922	0.0613645			0.007069	3.394			0.0266204	0.0847256			0.0208922	0.105324			0.0266204	0.0957853			0.0266204	0.0979845			0.0266204	0.0952745
0.028151	0.0929861			0.028151	0.0799312			0.0216054	0.0689661			0.019361	0.0618719			0.019361	0.0643723		0.019361	0.0670901		0.0216054	0.0601572			0.007473	2.753			0.0281408	0.0810343			0.0216054	0.100623			0.0281408	0.091191			0.0281408	0.093986			0.0281408	0.0911254
0.0296718	0.0913865			0.0296718	0.0797087			0.0223185	0.0680821			0.0204072	0.0619389			0.0204072	0.0647833		0.0204072	0.0674267		0.0223185	0.061027			0.007876	2.28			0.029661	0.0780085			0.0223185	0.0988839			0.029661	0.0864816			0.029661	0.0916881			0.029661	0.0895632
0.0311924	0.0893517			0.0311924	0.0789495			0.0230316	0.0667702			0.0214534	0.0618604			0.0214534	0.0638784		0.0214534	0.0661469		0.0230316	0.0603954			0.00828	1.993			0.0311811	0.0769425			0.0230316	0.0946926			0.0311811	0.0844747			0.0311811	0.0902141			0.0311811	0.0884696
0.0327129	0.0890557			0.0327129	0.0786009			0.0237447	0.0659621			0.0224996	0.0616154			0.0224996	0.0639506		0.0224996	0.0651759		0.0237447	0.0602939			0.008684	1.61			0.0327011	0.0759597			0.0237447	0.0936806			0.0327011	0.0825631			0.0327011	0.0889422			0.0327011	0.0874671
0.0342333	0.0887851			0.0342333	0.0792971			0.0244577	0.0643722			0.0235457	0.0615716			0.0235457	0.0633622		0.0235457	0.0652204		0.0244577	0.0592539			0.008866	1.901			0.0342208	0.0756196			0.0244577	0.0905456			0.0342208	0.0817264			0.0342208	0.0885394			0.0342208	0.0877907
0.0357534	0.0874455			0.0357534	0.0782884			0.0251708	0.0643043			0.0245918	0.0621667			0.0245918	0.0634834		0.0245918	0.064429		0.0251708	0.0604054			0.009088	1.41			0.0357405	0.0738157			0.0251708	0.090501			0.0357405	0.0797576			0.0357405	0.0870859			0.0357405	0.0856643
0.0372734	0.0864472			0.0372734	0.0786585			0.0258838	0.0635228			0.0256377	0.0624485			0.0256377	0.0634258		0.0256377	0.064986		0.0258838	0.0595279			0.009492	1.197			0.0372599	0.0737362			0.0258838	0.0880127			0.0372599	0.0792151			0.0372599	0.086648			0.0372599	0.08617
0.0387933	0.086304			0.0387933	0.0785804			0.0265967	0.0619736			0.0266837	0.0622426			0.0266837	0.0633355		0.0266837	0.0642803		0.0265967	0.0587838			0.009896	1.049			0.0387792	0.0735482			0.0265967	0.0853311			0.0387792	0.0783691			0.0387792	0.0858972			0.0387792	0.085196
0.0403129	0.0858078			0.0403129	0.0783122			0.0273097	0.0633516			0.0277296	0.0622287			0.0277296	0.0632129		0.0277296	0.0643563		0.0273097	0.0597524			0.01005	1.129			0.0402983	0.0717356			0.0273097	0.0856914			0.0402983	0.0773648			0.0402983	0.0846931			0.0402983	0.0849864
0.0418324	0.085999			0.0418324	0.0786194			0.0280226	0.062132			0.0287754	0.0623054			0.0287754	0.0639239		0.0287754	0.0643664		0.0280226	0.0594176			0.0103	0.9057			0.0418172	0.0731242			0.0280226	0.0842062			0.0418172	0.0770955			0.0418172	0.0849005			0.0418172	0.0856326
0.0433516	0.0851781			0.0433516	0.0784619			0.0287355	0.060928			0.0298211	0.0620182			0.0298211	0.0627869		0.0298211	0.0638471		0.0287355	0.0580899			0.0107	0.8512			0.0433359	0.0710205			0.0287355	0.0822343			0.0433359	0.075911			0.0433359	0.0843419			0.0433359	0.0849311
0.0448707	0.0851238			0.0448707	0.0781949			0.0294484	0.0616684			0.0308668	0.0621458			0.0308668	0.0629502		0.0308668	0.0640237		0.0294484	0.0587552			0.01111	0.6926			0.0448544	0.0714877			0.0294484	0.0821809			0.0448544	0.0761937			0.0448544	0.0848786			0.0448544	0.0851106
0.0463895	0.0849966			0.0463895	0.0784164			0.0301612	0.0614045			0.0319124	0.0628861			0.0319124	0.0639501		0.0319124	0.0649199		0.0301612	0.0592576			0.01123	0.7256			0.0463727	0.0707573			0.0301612	0.0815585			0.0463727	0.0754343			0.0463727	0.0840446			0.0463727	0.0843095
0.0479081	0.0852336			0.0479081	0.0789182			0.030874	0.0599779			0.032958	0.0623301			0.032958	0.0635707		0.032958	0.0646374		0.030874	0.0585642			0.01151	0.6018			0.0478908	0.0704568			0.030874	0.0795792			0.0478908	0.0748694			0.0478908	0.0840864			0.0478908	0.0846095
0.0494265	0.084696			0.0494265	0.0783945			0.0315867	0.0608872			0.0340035	0.0622861			0.0340035	0.0641801		0.0340035	0.0645906		0.0315867	0.0591697			0.01192	0.5802			0.0494086	0.0704984			0.0315867	0.0795139			0.0494086	0.0743974			0.0494086	0.0836363			0.0494086	0.0837737
0.0509447	0.0850781			0.0509447	0.0791184			0.0322995	0.0605918			0.0350488	0.0622906			0.0350488	0.064155		0.0350488	0.0647423		0.0322995	0.0584906			0.01232	0.4912			0.0509262	0.0706551			0.0322995	0.0784842			0.0509262	0.0745866			0.0509262	0.0838939			0.0509262	0.0847473
0.0524626	0.0853606			0.0524626	0.0793296			0.0330122	0.0602938			0.0360942	0.0625458			0.0360942	0.0642676		0.0360942	0.0656499		0.0330122	0.058925			0.01241	0.5151			0.0524436	0.0705613			0.0330122	0.0784775			0.0524436	0.0751232			0.0524436	0.0838802			0.0524436	0.0854813
0.0539803	0.085244			0.0539803	0.0791682			0.0337248	0.0599425			0.0371394	0.0620256			0.0371394	0.0642954		0.0371394	0.0652574		0.0337248	0.0581296			0.01272	0.4606			0.0539607	0.0702947			0.0337248	0.0765732			0.0539607	0.0745219			0.0539607	0.0836493			0.0539607	0.0847665
0.0554977	0.0848586			0.0554977	0.0790102			0.0344375	0.0598394			0.0381845	0.0622721			0.0381845	0.0645806		0.0381845	0.0655016		0.0344375	0.0577202			0.01313	0.4028			0.0554776	0.0701679			0.0344375	0.0759927			0.0554776	0.0740427			0.0554776	0.083417			0.0554776	0.084894
0.0570149	0.0850421			0.0570149	0.0796567			0.0351501	0.0600733			0.0392296	0.0614427			0.0392296	0.0642933		0.0392296	0.0649689		0.0351501	0.0589889			0.01353	0.3908			0.0569942	0.0712833			0.0351501	0.0768444			0.0569942	0.0742574			0.0569942	0.0836319			0.0569942	0.0849469
0.0585317	0.0854622			0.0585317	0.079589			0.0358626	0.0602633			0.0402746	0.0612614			0.0402746	0.064817		0.0402746	0.0655812		0.0358626	0.0586463			0.01359	0.3838			0.0585105	0.0700307			0.0358626	0.0769094			0.0585105	0.0740218			0.0585105	0.0840507			0.0585105	0.0850539
0.0600483	0.0854992			0.0600483	0.0803166			0.0365751	0.0602183			0.0413195	0.0613281			0.0413195	0.0650245		0.0413195	0.0656432		0.0365751	0.0583638			0.01393	0.3586			0.0600266	0.0711775			0.0365751	0.0764101			0.0600266	0.0743331			0.0600266	0.0844239			0.0600266	0.0860073
0.0615647	0.0857622			0.0615647	0.080604			0.0372876	0.0594057			0.0417155	0.061346			0.0423643	0.0647642		0.0423643	0.0656446		0.0372876	0.0586494			0.01434	0.3142			0.0615424	0.070831			0.0372876	0.0750869			0.0615424	0.0744066			0.0615424	0.0843192			0.0615424	0.0856303
0.0630807	0.0856255			0.0630807	0.0802594			0.0380001	0.0596874			0.0423643	0.0613397			0.043409	0.0651347		0.043409	0.0662658		0.0380001	0.0587995			0.01474	0.2948			0.0630578	0.0702362			0.0380001	0.0745967			0.0630578	0.0741093			0.0630578	0.0837589			0.0630578	0.0856263
0.0645964	0.0857948			0.0645964	0.0805137			0.0387125	0.0606312			0.043409	0.0609759			0.0444536	0.0655163		0.0444536	0.066239		0.0387125	0.0593224			0.01478	0.2918			0.064573	0.0703872			0.0387125	0.0757188			0.064573	0.074245			0.064573	0.0842002			0.064573	0.0856246
0.0661118	0.0863294			0.0661118	0.0812406			0.0394248	0.0586058			0.0444536	0.0613962			0.0454981	0.0646539		0.0454981	0.0666548		0.0394248	0.0584375			0.01515	0.2753			0.0660879	0.0714436			0.0394248	0.0738134			0.0660879	0.0747663			0.0660879	0.0843144			0.0660879	0.0870491
0.067627	0.0862805			0.067627	0.0809651			0.0401372	0.059771			0.0454981	0.060877			0.0465425	0.0655747		0.0465425	0.0669507		0.0401372	0.0582776			0.01555	0.2841			0.0676025	0.0712999			0.0401372	0.0731602			0.0676025	0.074209			0.0676025	0.0847921			0.0676025	0.0865377
0.0691418	0.0867808			0.0691418	0.0815258			0.0408494	0.0600089			0.0465425	0.0611434			0.0475868	0.0649909		0.0475868	0.0663909		0.0408494	0.0587268			0.01595	0.2348			0.0691167	0.0716583			0.0408494	0.0733325			0.0691167	0.0744383			0.0691167	0.0847946			0.0691167	0.0867239
0.0706562	0.0864322			0.0706562	0.0814811			0.0415617	0.059923			0.0466163	0.0609327			0.048631	0.0645238		0.048631	0.0663128		0.0415617	0.0586118			0.01596	0.235			0.0706307	0.0714775			0.0415617	0.0737414			0.0706307	0.0745282			0.0706307	0.0849884			0.0706307	0.0864031
0.0721704	0.0866845			0.0721704	0.0817795			0.0422739	0.0597306			0.0475868	0.0608168			0.0496751	0.0644177		0.0496751	0.066863		0.0422739	0.0588773			0.01636	0.2394			0.0721442	0.0717317			0.0422739	0.0731039			0.0721442	0.0745568			0.0721442	0.0854086			0.0721442	0.0868547
0.0736842	0.0870857			0.0736842	0.0821673			0.042986	0.0599653			0.048631	0.0602614			0.050719	0.0644423		0.050719	0.0669264		0.042986	0.059193			0.01676	0.2182			0.0736575	0.0720013			0.042986	0.0734841			0.0736575	0.0754265			0.0736575	0.0857027			0.0736575	0.0874609
0.0751976	0.0869769			0.0751976	0.0822876			0.0436981	0.0602079			0.0496751	0.0604632			0.0517629	0.0645771		0.0517629	0.0666536		0.0436981	0.059136			0.01714	0.1988			0.0751704	0.0723971			0.0436981	0.0733608			0.0751704	0.0749958			0.0751704	0.0857103			0.0751704	0.0873084
0.0767107	0.0874265			0.0767107	0.0826252			0.0444102	0.0598507			0.050719	0.0601216			0.0528066	0.0646969		0.0528066	0.0674322		0.0444102	0.0585229			0.01717	0.202			0.076683	0.0724128			0.0444102	0.0721843			0.076683	0.0751552			0.076683	0.0857497			0.076683	0.0874556
0.0782234	0.0876042			0.0782234	0.0827712			0.0451222	0.0601169			0.0515148	0.060271			0.0538502	0.0642891		0.0538502	0.0664593		0.0451222	0.0586734			0.01757	0.1907			0.0781952	0.0717927			0.0451222	0.0727236			0.0781952	0.0754717			0.0781952	0.08618			0.0781952	0.0880135
0.0797358	0.0875497			0.0797358	0.0827475			0.0458342	0.0611678			0.0517629	0.0603633			0.0548937	0.0642018		0.0548937	0.0666375		0.0458342	0.0597764			0.01797	0.1585			0.079707	0.0722662			0.0458342	0.073691			0.079707	0.0756244			0.079707	0.0859862			0.079707	0.0876222
0.0812478	0.0883649			0.0812478	0.0833263			0.0465461	0.0610439			0.0528066	0.060295			0.0559371	0.0639232		0.0559371	0.067073		0.0465461	0.0601829			0.01832	0.1689			0.0812184	0.0733062			0.0465461	0.0731191			0.0812184	0.0762999			0.0812184	0.0871213			0.0812184	0.0882945
0.0827594	0.0882795			0.0827594	0.083303			0.0472579	0.0612932			0.0538502	0.0602521			0.0569804	0.0641197		0.0569804	0.0663784		0.0472579	0.0598856			0.01838	0.1777			0.0827295	0.0727367			0.0472579	0.0729435			0.0827295	0.0754851			0.0827295	0.0865026			0.0827295	0.0877814
0.0842706	0.0885057			0.0842706	0.0835218			0.0479698	0.0606202			0.0548937	0.0605642			0.0580235	0.0634464		0.0580235	0.0663192		0.0479698	0.0598712			0.01878	0.1708			0.0842402	0.0729098			0.0479698	0.0719621			0.0842402	0.0761783			0.0842402	0.0867672			0.0842402	0.0878858
0.0857815	0.0883838			0.0857815	0.0838763			0.0486815	0.0614991			0.0559371	0.0595706			0.0590665	0.0633858		0.0590665	0.0662654		0.0486815	0.0601269			0.01918	0.1667			0.0857505	0.0737144			0.0486815	0.0727975			0.0857505	0.0764888			0.0857505	0.087031			0.0857505	0.0885843
0.0872919	0.0892056			0.0872919	0.0838075			0.0493933	0.0603466			0.0564107	0.0600798			0.0601094	0.063466		0.0601094	0.0661999		0.0493933	0.0592148			0.0195	0.148			0.0872603	0.073193			0.0493933	0.0713205			0.0872603	0.0761781			0.0872603	0.0875919			0.0872603	0.0887541
0.0888019	0.0890057			0.0888019	0.0839604			0.0501049	0.0615106			0.0569804	0.0600667			0.0611521	0.0633416		0.0611521	0.0656751		0.0501049	0.0602766			0.01959	0.1644			0.0887698	0.0739422			0.0501049	0.0724432			0.0887698	0.0770007			0.0887698	0.087698			0.0887698	0.0888559
0.0903115	0.0890252			0.0903115	0.0839321			0.0508166	0.0601796			0.0580235	0.0598417			0.0621947	0.0636125		0.0621947	0.0662753		0.0508166	0.059688			0.01999	0.164			0.0902789	0.0736393			0.0508166	0.0711246			0.0902789	0.0765775			0.0902789	0.0877236			0.0902789	0.0886035
0.0918207	0.0893233			0.0918207	0.083852			0.0515281	0.0614211			0.0590665	0.0599506			0.0632371	0.0633563		0.0632371	0.0662278		0.0515281	0.0604638			0.0204	0.1545			0.0917875	0.0740487			0.0515281	0.0719699			0.0917875	0.0768164			0.0917875	0.0881773			0.0917875	0.0891949
0.0933294	0.0893417			0.0933294	0.0836119			0.0522396	0.0616746			0.0601094	0.0602338			0.0642795	0.0632331		0.0642795	0.0663118		0.0522396	0.0607643			0.02068	0.137			0.0932957	0.0740008			0.0522396	0.0719247			0.0932957	0.0761293			0.0932957	0.0876862			0.0932957	0.0884613
0.0948377	0.0902508			0.0948377	0.0843576			0.0529511	0.0616563			0.0611521	0.059813			0.0653216	0.0631525		0.0653216	0.0659023		0.0529511	0.0608512			0.0208	0.1464			0.0948035	0.0744997			0.0529511	0.0720135			0.0948035	0.0772451			0.0948035	0.0882585			0.0948035	0.0893686
0.0963456	0.0896426			0.0963456	0.0842215			0.0536625	0.0621259			0.0613039	0.0599166			0.0663637	0.0630433		0.0663637	0.0659752		0.0536625	0.0605887			0.0212	0.1416			0.0963108	0.0743021			0.0536625	0.0726747			0.0963108	0.0772406			0.0963108	0.0878976			0.0963108	0.0886889
0.097853	0.0904531			0.097853	0.0844466			0.0543738	0.0612877			0.0621947	0.0600248			0.0674055	0.0625314		0.0674055	0.0655903		0.0543738	0.0610965			0.02161	0.1358			0.0978177	0.0745682			0.0543738	0.0719897			0.0978177	0.0777454			0.0978177	0.0888375			0.0978177	0.0890933
0.0993599	0.0903337			0.0993599	0.0844224			0.0550851	0.0613851			0.0632371	0.0601925			0.0684473	0.0626464		0.0684473	0.0653348		0.0550851	0.0601582			0.02187	0.1239			0.0993241	0.0744767			0.0550851	0.0715615			0.0993241	0.078012			0.0993241	0.088788			0.0993241	0.0885271
0.100866	0.0898658			0.100866	0.0839934			0.0557964	0.0618072			0.0642795	0.0602379			0.0694888	0.062885		0.0694888	0.065403		0.0557964	0.0608572			0.02201	0.1318			0.10083	0.073956			0.0557964	0.0715466			0.10083	0.0775185			0.10083	0.0890406			0.10083	0.0890154
0.102372	0.090053			0.102372	0.084259			0.0565075	0.0620024			0.0653216	0.0598853			0.0705303	0.0627595		0.0705303	0.0655688		0.0565075	0.0608156			0.02241	0.1172			0.102335	0.0747344			0.0565075	0.0717907			0.102335	0.0779663			0.102335	0.0884949			0.102335	0.0890212
0.103878	0.0899834			0.103878	0.0838898			0.0572186	0.0626041			0.0661941	0.059814			0.0715715	0.0623352		0.0715715	0.0650764		0.0572186	0.0615481			0.02282	0.1233			0.10384	0.074833			0.0572186	0.0725803			0.10384	0.0781677			0.10384	0.0884776			0.10384	0.0883221
0.105383	0.0908148			0.105383	0.0842238			0.0579297	0.0632907			0.0663637	0.0596636			0.0726126	0.0626433		0.0726126	0.0651141		0.0579297	0.061141			0.02305	0.1132			0.105345	0.0752364			0.0579297	0.0721392			0.105345	0.078466			0.105345	0.089218			0.105345	0.0888083
0.106888	0.0906053			0.106888	0.0840643			0.0586407	0.0620932			0.0674055	0.0597366			0.0736536	0.0624916		0.0736536	0.0649264		0.0586407	0.0608807			0.02322	0.1136			0.106849	0.0752163			0.0586407	0.0713083			0.106849	0.0783724			0.106849	0.089131			0.106849	0.0888732
0.108392	0.0904653			0.108392	0.0838473			0.0593516	0.0628054			0.0684473	0.059576			0.0746943	0.062166		0.0746943	0.0646017		0.0593516	0.0612779			0.02363	0.1154			0.108353	0.0752732			0.0593516	0.0723112			0.108353	0.0784698			0.108353	0.0890975			0.108353	0.0886592
0.109895	0.0905411			0.109895	0.0836053			0.0600625	0.0624334			0.0694888	0.0596193			0.0757349	0.0619284		0.0757349	0.0646564		0.0600625	0.0623033			0.02403	0.11			0.109856	0.0749951			0.0600625	0.0725296			0.109856	0.0781993			0.109856	0.0889375			0.109856	0.0886095
0.111398	0.0907711			0.111398	0.0836236			0.0607733	0.0629145			0.0705303	0.0597282			0.0767754	0.0624095		0.0767754	0.0648759		0.0607733	0.0617491			0.02423	0.1068			0.111358	0.075431			0.0607733	0.072572			0.111358	0.0786352			0.111358	0.0890537			0.111358	0.088503
0.112901	0.0903059			0.112901	0.0832486			0.061484	0.0630461			0.071081	0.0596037			0.0778157	0.0620737		0.0778157	0.0642976		0.061484	0.0617865			0.02443	0.1096			0.11286	0.0754085			0.061484	0.0716073			0.11286	0.0788756			0.11286	0.0892405			0.11286	0.0882403
0.114403	0.0908682			0.114403	0.0836816			0.0621947	0.0629186			0.0715715	0.0594991			0.0788557	0.0621018		0.0788557	0.0644125		0.0621947	0.0616402			0.02484	0.1162			0.114362	0.0755775			0.0621947	0.0717733			0.114362	0.079468			0.114362	0.0891231			0.114362	0.0885047
0.115904	0.0907504			0.115904	0.0828606			0.0629054	0.0627613			0.0726126	0.0596249			0.0798957	0.0625296		0.0798957	0.0641331		0.0629054	0.0618184			0.02524	0.1081			0.115862	0.0750607			0.0629054	0.0721249			0.115862	0.0792733			0.115862	0.0887465			0.115862	0.0881753
0.117405	0.0903307			0.117405	0.0828559			0.0636159	0.0628741			0.0736536	0.0595315			0.0809354	0.0621171		0.0809354	0.064478		0.0636159	0.0616479			0.02541	0.1012			0.117363	0.0751452			0.0636159	0.0718579			0.117363	0.079314			0.117363	0.0890084			0.117363	0.0876693
0.118905	0.0904929			0.118905	0.0828142			0.0643264	0.0631211			0.0746943	0.0595034			0.081975	0.061603		0.081975	0.0643923		0.0643264	0.0619035			0.02564	0.1042			0.118863	0.0754129			0.0643264	0.0723303			0.118863	0.0793209			0.118863	0.0888685			0.118863	0.0877676
0.120405	0.0903594			0.120405	0.0826428			0.0650368	0.0634961			0.0757349	0.0592139			0.0830144	0.0622339		0.0830144	0.0642452		0.0650368	0.0620601			0.02605	0.1028			0.120362	0.0748701			0.0650368	0.0710564			0.120362	0.0790129			0.120362	0.0888631			0.120362	0.0875602
0.121905	0.0908584			0.121905	0.0826524			0.0657472	0.0640321			0.0759644	0.059232			0.0840536	0.061775		0.0840536	0.0640434		0.0657472	0.0631618			0.02645	0.09373			0.121861	0.0750967			0.0657472	0.0720818			0.121861	0.080093			0.121861	0.0890711			0.121861	0.0876696
0.123403	0.0902012			0.123403	0.0823526			0.0664575	0.0630817			0.0767754	0.059443			0.0850926	0.0615009		0.0850926	0.0633381		0.0664575	0.0615812			0.02659	0.09753			0.123359	0.0747259			0.0664575	0.0716814			0.123359	0.0787702			0.123359	0.088536			0.123359	0.0869512
0.124901	0.0898469			0.124901	0.0819954			0.0671677	0.063244			0.0778157	0.0592825			0.0861314	0.0617098		0.0861314	0.0642568		0.0671677	0.0624392			0.02777	0.09284			0.124857	0.0748516			0.0671677	0.0720548			0.124857	0.0787584			0.124857	0.0886059			0.124857	0.0866845
0.126399	0.0898034			0.126399	0.0820841			0.0678778	0.0631567			0.0788557	0.0592553			0.08717	0.061919		0.08717	0.0636463		0.0678778	0.0625606			0.02895	0.09099			0.126354	0.0747344			0.0678778	0.0724324			0.126354	0.0796435			0.126354	0.0881186			0.126354	0.0863706
0.127896	0.0892898			0.127896	0.0816777			0.0685879	0.0638066			0.0798957	0.0593859			0.0882085	0.0616015		0.0882085	0.0636979		0.0685879	0.0628298			0.03014	0.08819			0.12785	0.0744303			0.0685879	0.0727064			0.12785	0.0790401			0.12785	0.0881008			0.12785	0.0861837
0.129392	0.0896217			0.129392	0.0816294			0.0692979	0.0632918			0.0808441	0.0593605			0.0892467	0.0616396		0.0892467	0.0636703		0.0692979	0.0622683			0.03132	0.08639			0.129346	0.0747854			0.0692979	0.0721251			0.129346	0.0789735			0.129346	0.0879456			0.129346	0.0861117
0.130888	0.0894503			0.130888	0.0814666			0.0700078	0.0628556			0.0809354	0.059304			0.0902847	0.0614111		0.0902847	0.063336		0.0700078	0.062377			0.0325	0.08306			0.130841	0.0744577			0.0700078	0.0725179			0.130841	0.0795034			0.130841	0.0881637			0.130841	0.0864801
0.132383	0.0893671			0.132383	0.0810828			0.0707177	0.063096			0.081975	0.0594779			0.0913226	0.0619451		0.0913226	0.063633		0.0707177	0.0620731			0.03368	0.08325			0.132336	0.0744519			0.0707177	0.0728793			0.132336	0.0787898			0.132336	0.0878002			0.132336	0.0858156
0.133878	0.0889908			0.133878	0.0810364			0.0714275	0.062629			0.0830144	0.0596498			0.0923602	0.0616007		0.0923602	0.0636299		0.0714275	0.0618417			0.03368	0.08162			0.13383	0.074009			0.0714275	0.0719207			0.13383	0.0789955			0.13383	0.0876765			0.13383	0.0858887
0.135372	0.0888861			0.135372	0.0804583			0.0721372	0.0631115			0.0840536	0.0595288			0.0933977	0.0613661		0.0933977	0.0631073		0.0721372	0.0621829			0.03486	0.08309			0.135323	0.0736376			0.0721372	0.072903			0.135323	0.0786933			0.135323	0.0874222			0.135323	0.0853092
0.136865	0.0889592			0.136865	0.0807137			0.0728468	0.0625927			0.0850926	0.0588627			0.0944349	0.0617533		0.0944349	0.063432		0.0728468	0.0616313			0.03604	0.08123			0.136816	0.0739002			0.0728468	0.0721926			0.136816	0.0789357			0.136816	0.0874627			0.136816	0.0859792
0.138358	0.0889057			0.138358	0.0805727			0.0735564	0.0628555			0.0857199	0.0592812			0.0954719	0.0613203		0.0954719	0.0632959		0.0735564	0.0618307			0.03722	0.08112			0.138308	0.07409			0.0735564	0.0722876			0.138308	0.0788757			0.138308	0.0872657			0.138308	0.0853878
0.13985	0.0882815			0.13985	0.0802701			0.0742659	0.0628161			0.0861314	0.0591981			0.0965087	0.061562		0.0965087	0.0632351		0.0742659	0.0618372			0.03722	0.08089			0.1398	0.073623			0.0742659	0.0720646			0.1398	0.0787284			0.1398	0.0868612			0.1398	0.0851196
0.141341	0.0883267			0.141341	0.080225			0.0749753	0.0624939			0.08717	0.0590357			0.0975453	0.0615068		0.0975453	0.0632719		0.0749753	0.0616863			0.0384	0.08106			0.141291	0.0736765			0.0749753	0.0724867			0.141291	0.0786966			0.141291	0.0866052			0.141291	0.0848221
0.0417155	0.0862487			0.0417155	0.0786491			0.0756846	0.0628447			0.0882085	0.0591647			0.0417155	0.0649524		0.0417155	0.0658148		0.0756846	0.0618501			0.03958	0.07903			0.0417155	0.0724095			0.0756846	0.0728557			0.0417155	0.0770884			0.0417155	0.0855137			0.0417155	0.0853863
0.0466163	0.0859114			0.0466163	0.0792906			0.0763939	0.0627557			0.0892467	0.0591271			0.0466163	0.0650835		0.0466163	0.0662475		0.0763939	0.0615462			0.04076	0.07935			0.0466163	0.0713513			0.0763939	0.0718929			0.0466163	0.0761789			0.0466163	0.0847734			0.0466163	0.0854645
0.0515148	0.0849751			0.0515148	0.0791676			0.0771031	0.0633266			0.0902847	0.0590372			0.0515148	0.0644274		0.0515148	0.0665795		0.0771031	0.0627347			0.04076	0.07803			0.0515148	0.0714272			0.0771031	0.0734162			0.0515148	0.0749101			0.0515148	0.0840492			0.0515148	0.0849164
0.0564107	0.0851139			0.0564107	0.0798308			0.0778122	0.0624482			0.0905914	0.05912			0.0564107	0.0636706		0.0564107	0.0665255		0.0778122	0.0615739			0.04194	0.07649			0.0564107	0.0707669			0.0778122	0.072575			0.0564107	0.0743003			0.0564107	0.0837155			0.0564107	0.0853795
0.0613039	0.085651			0.0613039	0.0806113			0.0785212	0.062323			0.0913226	0.0593517			0.0613039	0.0632105		0.0613039	0.0662561		0.0785212	0.0618258			0.04312	0.07751			0.0613039	0.0708127			0.0785212	0.0727445			0.0613039	0.0742207			0.0613039	0.0843876			0.0613039	0.0858857
0.0661941	0.0860977			0.0661941	0.0811967			0.0792301	0.062313			0.0923602	0.0593655			0.0661941	0.0630804		0.0661941	0.0656652		0.0792301	0.061571			0.0443	0.07807			0.0661941	0.0709833			0.0792301	0.0728838			0.0661941	0.0742139			0.0661941	0.0848478			0.0661941	0.0867616
0.071081	0.0867058			0.071081	0.0820618			0.079939	0.0624318			0.0933977	0.0593684			0.071081	0.0624309		0.071081	0.0653267		0.079939	0.0617566			0.0443	0.07936			0.071081	0.0716018			0.079939	0.0733363			0.071081	0.0747533			0.071081	0.0851034			0.071081	0.086983
0.0759644	0.0870108			0.0759644	0.0825529			0.0806477	0.0619341			0.0944349	0.0591087			0.0759644	0.0620612		0.0759644	0.064753		0.0806477	0.0616383			0.04548	0.07654			0.0759644	0.0721518			0.0806477	0.0725997			0.0759644	0.0747894			0.0759644	0.0857975			0.0759644	0.0874112
0.0808441	0.0878077			0.0808441	0.0833603			0.0813564	0.0625519			0.0954586	0.0588421			0.0808441	0.062067		0.0808441	0.0642975		0.0813564	0.0613308			0.04666	0.07697			0.0808441	0.0725823			0.0813564	0.0730851			0.0808441	0.0757906			0.0808441	0.0864373			0.0808441	0.0879147
0.0857199	0.088294			0.0857199	0.0837932			0.082065	0.061994			0.0954719	0.0593208			0.0857199	0.0617771		0.0857199	0.0639255		0.082065	0.0611714			0.04784	0.07686			0.0857199	0.0735617			0.082065	0.0731322			0.0857199	0.0762098			0.0857199	0.0872347			0.0857199	0.0882513
0.0905914	0.0890848			0.0905914	0.0839544			0.0827735	0.0616942			0.0965087	0.0589657			0.0905914	0.0616337		0.0905914	0.0635821		0.0827735	0.061947			0.04784	0.07688			0.0905914	0.0738873			0.0827735	0.073538			0.0905914	0.0763862			0.0905914	0.0877942			0.0905914	0.0885933
0.0954586	0.0893914			0.0954586	0.0841114			0.083482	0.0621492			0.0975453	0.0594255			0.0954586	0.0613581		0.0954586	0.0632396		0.083482	0.0616985			0.04902	0.07858			0.0954586	0.0739247			0.083482	0.0736116			0.0954586	0.0769414			0.0954586	0.0879534			0.0954586	0.0888743
0.100321	0.0900708			0.100321	0.0842458			0.0841903	0.0619038			0.100321	0.0588524			0.100321	0.0613269		0.100321	0.0632117		0.0841903	0.0618914			0.0502	0.07683			0.100321	0.0745528			0.0841903	0.074057			0.100321	0.0779586			0.100321	0.0885536			0.100321	0.0887551
0.105179	0.0899807			0.105179	0.0840812			0.0848986	0.0621326			0.105179	0.0587751			0.105179	0.0612		0.105179	0.062835		0.0848986	0.0610519			0.05138	0.07637			0.105179	0.074922			0.0848986	0.0734866			0.105179	0.0780182			0.105179	0.0887558			0.105179	0.0884833
0.110031	0.0904254			0.110031	0.0837786			0.0856067	0.0616386			0.110031	0.0588262			0.110031	0.0611285		0.110031	0.0628385		0.0856067	0.0613832			0.05138	0.07763			0.110031	0.0751039			0.0856067	0.0737716			0.110031	0.0787386			0.110031	0.0889731			0.110031	0.0884785
0.114878	0.0902041			0.114878	0.0832014			0.0863148	0.0618367			0.114878	0.0588173			0.114878	0.0611074		0.114878	0.062764		0.0863148	0.0610759			0.05256	0.0771			0.114878	0.0751773			0.0863148	0.0739167			0.114878	0.0791135			0.114878	0.0888878			0.114878	0.0877414
0.11972	0.0901354			0.11972	0.0827954			0.0870228	0.0611233			0.11972	0.0586968			0.11972	0.0609388		0.11972	0.0627249		0.0870228	0.0605837			0.05374	0.07532			0.11972	0.0750042			0.0870228	0.0733866			0.11972	0.0791962			0.11972	0.0888774			0.11972	0.0874936
0.124556	0.0899793			0.124556	0.0821464			0.0877307	0.0609561			0.124556	0.0586584			0.124556	0.0608035		0.124556	0.0626601		0.0877307	0.0602844			0.05491	0.07638			0.124556	0.0750315			0.0877307	0.0733364			0.124556	0.0793141			0.124556	0.0885289			0.124556	0.086897
0.129385	0.0895433			0.129385	0.0818337			0.0884385	0.0613783			0.129385	0.0585989			0.129385	0.0608048		0.129385	0.0623924		0.0884385	0.0603912			0.05491	0.07683			0.129385	0.074873			0.0884385	0.0736741			0.129385	0.0790841			0.129385	0.0884466			0.129385	0.0864397
0.134209	0.0889457			0.134209	0.0812865			0.0891462	0.0613477			0.134209	0.0585951			0.134209	0.0605493		0.134209	0.0623619		0.0891462	0.0601818			0.05609	0.07597			0.134209	0.0741104			0.0891462	0.0744588			0.134209	0.0790829			0.134209	0.0878748			0.134209	0.0859914
0.139026	0.0886842			0.139026	0.0808767			0.0898539	0.0607452			0.139026	0.0585217			0.139026	0.0607068		0.139026	0.0622601		0.0898539	0.0608707			0.05727	0.07664			0.139026	0.0741063			0.0898539	0.0741682			0.139026	0.0788059			0.139026	0.0874083			0.139026	0.0854634
0.143837	0.0879706			0.143837	0.0800844			0.0905614	0.0609126			0.143837	0.0584533			0.143837	0.060452		0.143837	0.0621389		0.0905614	0.0602723			0.05845	0.07661			0.143837	0.0733288			0.0905614	0.0744318			0.143837	0.0782581			0.143837	0.0865665			0.143837	0.0848083
0.14864	0.0874219			0.14864	0.0797429			0.0912689	0.0610677			0.14864	0.0584273			0.14864	0.0605241		0.14864	0.0619624		0.0912689	0.0606448			0.05845	0.07558			0.14864	0.0730789			0.0912689	0.0739011			0.14864	0.0781574			0.14864	0.0860338			0.14864	0.0846426
0.153437	0.087077			0.153437	0.0794754			0.0919762	0.0608872			0.153437	0.0585781			0.153437	0.0604336		0.153437	0.0621734		0.0919762	0.0605676			0.05963	0.07368			0.153437	0.0725474			0.0919762	0.0748631			0.153437	0.0780275			0.153437	0.0854517			0.153437	0.0841834
0.158226	0.0867477			0.158226	0.0790592			0.0926835	0.0611993			0.158226	0.0584637			0.158226	0.0604252		0.158226	0.0619765		0.0926835	0.0603569			0.0608	0.07717			0.158226	0.0723529			0.0926835	0.0750338			0.158226	0.0774859			0.158226	0.0851637			0.158226	0.0839623
0.163007	0.0861336			0.163007	0.0789035			0.0933906	0.0604206			0.163007	0.0584063			0.163007	0.0603893		0.163007	0.0618532		0.0933906	0.0596817			0.06198	0.07661			0.163007	0.0716917			0.0933906	0.0746035			0.163007	0.0771344			0.163007	0.084526			0.163007	0.0836278
0.167781	0.0855693			0.167781	0.0783946			0.0940977	0.0608615			0.167781	0.0581979			0.167781	0.0601611		0.167781	0.0617066		0.0940977	0.0606699			0.06198	0.07636			0.167781	0.0712632			0.0940977	0.0747876			0.167781	0.0766303			0.167781	0.083862			0.167781	0.0829214
0.172547	0.0851268			0.172547	0.078086			0.0948047	0.0600425			0.172547	0.0583639			0.172547	0.0602581		0.172547	0.0617598		0.0948047	0.0599554			0.06316	0.07624			0.172547	0.0712267			0.0948047	0.0743318			0.172547	0.0763155			0.172547	0.0835286			0.172547	0.0830973
0.177305	0.0848393			0.177305	0.0776742			0.0955115	0.0605139			0.177305	0.0581948			0.177305	0.0600951		0.177305	0.0615314		0.0955115	0.0596935			0.06434	0.07632			0.177305	0.0706816			0.0955115	0.0754259			0.177305	0.0757181			0.177305	0.08297			0.177305	0.0822129
0.182055	0.0844009			0.182055	0.0777029			0.0962183	0.0602562			0.182055	0.0583143			0.182055	0.0601386		0.182055	0.0615778		0.0962183	0.0597386			0.06551	0.07698			0.182055	0.0704374			0.0962183	0.0746092			0.182055	0.0752821			0.182055	0.0825476			0.182055	0.0822225
0.186796	0.0842489			0.186796	0.077538			0.096925	0.0608252			0.186796	0.058311			0.186796	0.0601572		0.186796	0.0616637		0.096925	0.0600083			0.06551	0.07811			0.186796	0.0704091			0.096925	0.0752243			0.186796	0.0750879			0.186796	0.0823221			0.186796	0.082374
0.191528	0.0837534			0.191528	0.0772431			0.0976315	0.0600612			0.191528	0.0583053			0.191528	0.0600543		0.191528	0.0613753		0.0976315	0.0597808			0.06669	0.07607			0.191528	0.0696415			0.0976315	0.074542			0.191528	0.0745999			0.191528	0.0818382			0.191528	0.0821052
0.196251	0.083343			0.196251	0.077078			0.098338	0.0604426			0.196251	0.0581549			0.196251	0.0599441		0.196251	0.0614061		0.098338	0.0600469			0.06787	0.07847			0.196251	0.0693055			0.098338	0.0753126			0.196251	0.0742971			0.196251	0.0816281			0.196251	0.0816928
0.200966	0.0832284			0.200966	0.0768147			0.0990444	0.0600358			0.200966	0.0580606			0.200966	0.059878		0.200966	0.0613869		0.0990444	0.0599313			0.06904	0.07874			0.200966	0.0692778			0.0990444	0.0757282			0.200966	0.0740478			0.200966	0.0812			0.200966	0.0816511
0.205671	0.082882			0.205671	0.0765297			0.0997507	0.0604042			0.205671	0.0581232			0.205671	0.0599228		0.205671	0.0612697		0.0997507	0.0598036			0.06904	0.07853			0.205671	0.0689848			0.0997507	0.0752906			0.205671	0.0736665			0.205671	0.080874			0.205671	0.081136
0.210366	0.0827711			0.210366	0.076608			0.100457	0.0602572			0.210366	0.0581055			0.210366	0.0599097		0.210366	0.0612302		0.100457	0.0597457			0.07022	0.07668			0.210366	0.0690149			0.100457	0.0760471			0.210366	0.0732588			0.210366	0.0806948			0.210366	0.081216
0.215052	0.0823722			0.215052	0.0764768			0.101163	0.0598234			0.215052	0.0581643			0.215052	0.0599782		0.215052	0.0612141		0.101163	0.0597596			0.0714	0.07642			0.215052	0.0688874			0.101163	0.0761681			0.215052	0.0733114			0.215052	0.0803973			0.215052	0.0810891
0.219728	0.0821775			0.219728	0.0762798			0.101869	0.0593307			0.219728	0.0581011			0.219728	0.059887		0.219728	0.0610848		0.101869	0.0599083			0.07257	0.07815			0.219728	0.0684795			0.101869	0.0760196			0.219728	0.0728254			0.219728	0.0802192			0.219728	0.0808916
0.224394	0.0820436			0.224394	0.0761541			0.102575	0.0599555			0.224394	0.0580882			0.224394	0.0598353		0.224394	0.0610923		0.102575	0.0586632			0.07257	0.0785			0.224394	0.0683133			0.102575	0.0767378			0.224394	0.0725697			0.224394	0.0799932			0.224394	0.0807045
0.229049	0.0818768			0.229049	0.0759544			0.10328	0.0596083			0.229049	0.0580395			0.229049	0.0599131		0.229049	0.0610882		0.10328	0.0588141			0.07375	0.07538			0.229049	0.0680887			0.10328	0.0757013			0.229049	0.072485			0.229049	0.0797358			0.229049	0.0808465
0.233694	0.0815792			0.233694	0.07564			0.103986	0.0606526			0.233694	0.057961			0.233694	0.0596705		0.233694	0.0610847		0.103986	0.0603145			0.0761	0.07905			0.233694	0.0678508			0.103986	0.0772596			0.233694	0.0721161			0.233694	0.0794972			0.233694	0.0802532
0.238329	0.0814432			0.238329	0.0757157			0.104692	0.0603684			0.238329	0.0580449			0.238329	0.0597262		0.238329	0.0609805		0.104692	0.0600361			0.07962	0.07914			0.238329	0.0676924			0.104692	0.076633			0.238329	0.0718655			0.238329	0.079468			0.238329	0.0803404
0.242953	0.0813805			0.242953	0.0756814			0.105397	0.0595667			0.242953	0.0580572			0.242953	0.059786		0.242953	0.0610489		0.105397	0.059013			0.08315	0.07902			0.242953	0.0675972			0.105397	0.0763602			0.242953	0.0719683			0.242953	0.0793453			0.242953	0.080345
0.247566	0.0811168			0.247566	0.07549			0.106102	0.0597598			0.247566	0.0580648			0.247566	0.0596933		0.247566	0.0608314		0.106102	0.0599721			0.08667	0.07969			0.247566	0.0674665			0.106102	0.0771014			0.247566	0.0713811			0.247566	0.0791027			0.247566	0.0801574
0.252168	0.0809792			0.252168	0.0752573			0.106808	0.0593137			0.252168	0.0579411			0.252168	0.0596367		0.252168	0.0609104		0.106808	0.0586508			0.09018	0.07879			0.252168	0.0673613			0.106808	0.0755451			0.252168	0.0715425			0.252168	0.0789891			0.252168	0.079946
0.256759	0.0808214			0.256759	0.0751471			0.107513	0.0593367			0.256759	0.0580383			0.256759	0.0597173		0.256759	0.060866		0.107513	0.0600383			0.0937	0.08012			0.256759	0.0670721			0.107513	0.0767627			0.256759	0.0711634			0.256759	0.0786457			0.256759	0.0799643
0.261338	0.0808258			0.261338	0.0751551			0.108218	0.0596609			0.261338	0.0580103			0.261338	0.0596109		0.261338	0.0609036		0.108218	0.0598155			0.09721	0.08072			0.261338	0.0670694			0.108218	0.0770069			0.261338	0.0711517			0.261338	0.078631			0.261338	0.07982
0.265906	0.0806905			0.265906	0.0750569			0.108923	0.0590497			0.265906	0.0580484			0.265906	0.0597672		0.265906	0.0609866		0.108923	0.0581234			0.1007	0.08114			0.265906	0.0669756			0.108923	0.0757833			0.265906	0.0709201			0.265906	0.078511			0.265906	0.0797883
0.270462	0.0805121			0.270462	0.0749357			0.109627	0.0586516			0.270462	0.0579494			0.270462	0.0597392		0.270462	0.0607478		0.109627	0.0585912			0.1042	0.08053			0.270462	0.0669613			0.109627	0.0757825			0.270462	0.0708502			0.270462	0.0782394			0.270462	0.0797533
0.275006	0.0803911			0.275006	0.0749657			0.110332	0.0588846			0.275006	0.0580256			0.275006	0.0597147		0.275006	0.0609243		0.110332	0.0591273			0.1077	0.08065			0.275006	0.0670196			0.110332	0.0773032			0.275006	0.0708261			0.275006	0.0785036			0.275006	0.0797004
0.279538	0.0803375			0.279538	0.0748016			0.111037	0.059029			0.279538	0.0581483			0.279538	0.0597768		0.279538	0.0610223		0.111037	0.0586862			0.1112	0.08018			0.279538	0.0669005			0.111037	0.0767314			0.279538	0.070861			0.279538	0.07815			0.279538	0.0796689
0.284058	0.0804175			0.284058	0.0748572			0.111741	0.0596571			0.284058	0.0583028			0.284058	0.0598863		0.284058	0.0611421		0.111741	0.0586006			0.1147	0.07965			0.284058	0.0668481			0.111741	0.0767416			0.284058	0.0707445			0.284058	0.0783118			0.284058	0.0798468
0.288566	0.0801352			0.288566	0.0746848			0.112445	0.0587137			0.288566	0.0582531			0.288566	0.0599178		0.288566	0.060994		0.112445	0.0578629			0.1182	0.08026			0.288566	0.0666288			0.112445	0.0754877			0.288566	0.0705744			0.288566	0.077969			0.288566	0.0795247
0.293061	0.0799764			0.293061	0.0745012			0.11315	0.0592902			0.293061	0.0580397			0.293061	0.0596698		0.293061	0.0608675		0.11315	0.0587566			0.1217	0.08059			0.293061	0.066388			0.11315	0.0764744			0.293061	0.0702309			0.293061	0.077947			0.293061	0.0792783
0.297543	0.0799058			0.297543	0.0745383			0.113854	0.058036			0.297543	0.0580738			0.297543	0.0596614		0.297543	0.0608114		0.113854	0.0579904			0.1252	0.0791			0.297543	0.0663265			0.113854	0.0753036			0.297543	0.0701049			0.297543	0.0777176			0.297543	0.0793641
0.302013	0.0798437			0.302013	0.0744198			0.114558	0.0581256			0.302013	0.0580572			0.302013	0.0595887		0.302013	0.06084		0.114558	0.0592322			0.1287	0.07858			0.302013	0.0664497			0.114558	0.0764852			0.302013	0.0699135			0.302013	0.0776124			0.302013	0.0790449
0.30647	0.07979			0.30647	0.0743018			0.115261	0.0582813			0.30647	0.0581847			0.30647	0.0596863		0.30647	0.0607957		0.115261	0.0582414			0.1322	0.07878			0.30647	0.0660676			0.115261	0.0755703			0.30647	0.0698029			0.30647	0.0774649			0.30647	0.0791149
0.310915	0.0795205			0.310915	0.0742097			0.115965	0.0595644			0.310915	0.0580157			0.310915	0.0596916		0.310915	0.0606506		0.115965	0.0587664			0.1357	0.07881			0.310915	0.0661152			0.115965	0.0772875			0.310915	0.0697639			0.310915	0.0772046			0.310915	0.0788261
0.315346	0.0790901			0.315346	0.0740791			0.116669	0.0570365			0.315346	0.0579637			0.315346	0.0595514		0.315346	0.06066		0.116669	0.0589357			0.1392	0.07793			0.315346	0.0660446			0.116669	0.0757969			0.315346	0.0695256			0.315346	0.0771927			0.315346	0.078867
0.319763	0.0793281			0.319763	0.0741211			0.117372	0.0591207			0.319763	0.0579359			0.319763	0.0596205		0.319763	0.0605637		0.117372	0.058729			0.1426	0.07779			0.319763	0.0659238			0.117372	0.0763721			0.319763	0.0693694			0.319763	0.0771265			0.319763	0.0787285
0.324168	0.0791163			0.324168	0.0739091			0.118076	0.0595739			0.324168	0.0579299			0.324168	0.0594508		0.324168	0.0606844		0.118076	0.0580807			0.1461	0.0777			0.324168	0.0654794			0.118076	0.0784057			0.324168	0.0692284			0.324168	0.0769992			0.324168	0.0786436
0.328559	0.0790741			0.328559	0.0737165			0.118779	0.0590133			0.328559	0.0578126			0.328559	0.0593076		0.328559	0.0603502		0.118779	0.0582588			0.1496	0.07712			0.328559	0.0654263			0.118779	0.0773156			0.328559	0.0690627			0.328559	0.076817			0.328559	0.0785121
0.332936	0.0788641			0.332936	0.0736824			0.119482	0.0591261			0.332936	0.0578334			0.332936	0.0593375		0.332936	0.0604784		0.119482	0.0604035			0.153	0.07659			0.332936	0.0653083			0.119482	0.0780149			0.332936	0.0690931			0.332936	0.0767903			0.332936	0.0786044
0.3373	0.0787965			0.3373	0.0737591			0.120185	0.0595783			0.3373	0.0579783			0.3373	0.0594268		0.3373	0.0604623		0.120185	0.0599759			0.1565	0.0762			0.3373	0.065473			0.120185	0.0782879			0.3373	0.0690335			0.3373	0.076785			0.3373	0.0785028
0.34165	0.0787542			0.34165	0.0735628			0.120888	0.0588096			0.34165	0.0578934			0.34165	0.0593223		0.34165	0.0604624		0.120888	0.0564466			0.16	0.07553			0.34165	0.0651949			0.120888	0.076777			0.34165	0.0688706			0.34165	0.0766632			0.34165	0.0783276
0.345985	0.0786573			0.345985	0.073517			0.121591	0.0610234			0.345985	0.0577502			0.345985	0.0593454		0.345985	0.0603175		0.121591	0.0603176			0.1634	0.07666			0.345985	0.0650417			0.121591	0.0767311			0.345985	0.0686086			0.345985	0.0763821			0.345985	0.0780585
0.350307	0.0784257			0.350307	0.0734172			0.123905	0.0590742			0.350307	0.0577676			0.350307	0.05928		0.350307	0.0603198		0.123905	0.0587388			0.1669	0.07562			0.350307	0.0650371			0.123905	0.0768663			0.350307	0.0685331			0.350307	0.0762784			0.350307	0.0781656
0.354615	0.0782976			0.354615	0.0733239			0.126654	0.058481			0.354615	0.0576957			0.354615	0.0591919		0.354615	0.0601795		0.126654	0.0583511			0.1703	0.07585			0.354615	0.0649019			0.126654	0.076804			0.354615	0.0682819			0.354615	0.0760687			0.354615	0.0779648
0.358909	0.0782235			0.358909	0.0732769			0.129402	0.0579189			0.358909	0.0575973			0.358909	0.0590837		0.358909	0.0601573		0.129402	0.0578858			0.1737	0.0754			0.358909	0.0645971			0.129402	0.0765699			0.358909	0.0682012			0.358909	0.0761219			0.358909	0.0779236
0.363188	0.0781723			0.363188	0.073134			0.132147	0.0579821			0.363188	0.0575685			0.363188	0.0591226		0.363188	0.0601284		0.132147	0.057717			0.1772	0.07552			0.363188	0.0644855			0.132147	0.0760074			0.363188	0.0680516			0.363188	0.0760416			0.363188	0.0779658
0.367453	0.0778534			0.367453	0.0729953			0.13489	0.0582833			0.367453	0.0575052			0.367453	0.0589157		0.367453	0.0600272		0.13489	0.057874			0.1806	0.0754			0.367453	0.0644557			0.13489	0.0768245			0.367453	0.0679488			0.367453	0.0759417			0.367453	0.0777048
0.371703	0.0780237			0.371703	0.0729884			0.137631	0.0583483			0.371703	0.0575333			0.371703	0.0590412		0.371703	0.0600333		0.137631	0.0578395			0.184	0.07482			0.371703	0.0644595			0.137631	0.0759379			0.371703	0.0679056			0.371703	0.0757838			0.371703	0.0777059
0.375939	0.0778423			0.375939	0.0728935			0.14037	0.05815			0.375939	0.0575613			0.375939	0.0589596		0.375939	0.0599748		0.14037	0.0579121			0.1875	0.0747			0.375939	0.0642276			0.14037	0.0766095			0.375939	0.0678831			0.375939	0.0756608			0.375939	0.0775376
0.38016	0.0777252			0.38016	0.0728019			0.143107	0.0577164			0.38016	0.0574824			0.38016	0.0588987		0.38016	0.0599274		0.143107	0.0578827			0.1909	0.07493			0.38016	0.0641634			0.143107	0.0760587			0.38016	0.0675648			0.38016	0.0754038			0.38016	0.0773151
0.384366	0.077635			0.384366	0.0727509			0.145842	0.0581206			0.384366	0.0575018			0.384366	0.0588365		0.384366	0.059925		0.145842	0.058076			0.1943	0.07347			0.384366	0.0640717			0.145842	0.0759533			0.384366	0.0674112			0.384366	0.0754525			0.384366	0.077415
0.388557	0.0776753			0.388557	0.0727457			0.148574	0.0578776			0.388557	0.0575101			0.388557	0.0588395		0.388557	0.0599379		0.148574	0.0573057			0.1977	0.07453			0.388557	0.0641116			0.148574	0.0753596			0.388557	0.0674947			0.388557	0.0754242			0.388557	0.077261
0.392734	0.0772694			0.392734	0.072714			0.151304	0.0577835			0.392734	0.0574267			0.392734	0.0587774		0.392734	0.0598145		0.151304	0.0578137			0.2011	0.07463			0.392734	0.0637623			0.151304	0.075042			0.392734	0.0673614			0.392734	0.0753935			0.392734	0.0771599
0.396895	0.0773067			0.396895	0.0726012			0.154032	0.0572873			0.396895	0.057408			0.396895	0.0587799		0.396895	0.0598082		0.154032	0.0571724			0.2045	0.07427			0.396895	0.0637685			0.154032	0.0755945			0.396895	0.0673525			0.396895	0.0752219			0.396895	0.0771519
0.401041	0.0774194			0.401041	0.0725593			0.156757	0.0574195			0.401041	0.0574299			0.401041	0.0588354		0.401041	0.0597556		0.156757	0.0574589			0.2079	0.07403			0.401041	0.0638947			0.156757	0.0747039			0.401041	0.067327			0.401041	0.0751579			0.401041	0.077207
0.405173	0.0772649			0.405173	0.0724692			0.15948	0.0571961			0.405173	0.0573203			0.405173	0.0588003		0.405173	0.0597191		0.15948	0.057445			0.2113	0.07367			0.405173	0.0636846			0.15948	0.0741404			0.405173	0.0669581			0.405173	0.0750832			0.405173	0.0770599
0.409289	0.0770894			0.409289	0.0722783			0.1622	0.057438			0.409289	0.0572151			0.409289	0.0585874		0.409289	0.0595655		0.1622	0.0573527			0.2147	0.0741			0.409289	0.0635406			0.1622	0.0741465			0.409289	0.0668396			0.409289	0.0750456			0.409289	0.0768933
0.413389	0.0769333			0.413389	0.072213			0.164918	0.056997			0.413389	0.0572329			0.413389	0.0586602		0.413389	0.0596254		0.164918	0.0568766			0.218	0.07396			0.413389	0.0633427			0.164918	0.0743547			0.413389	0.0670336			0.413389	0.0749465			0.413389	0.0767356
0.417475	0.0767869			0.417475	0.0720068			0.167634	0.057303			0.417475	0.0571572			0.417475	0.0583675		0.417475	0.059462		0.167634	0.0576944			0.2214	0.07346			0.417475	0.0634387			0.167634	0.073679			0.417475	0.0666186			0.417475	0.0746942			0.417475	0.0766552
0.421545	0.0766884			0.421545	0.0718854			0.170347	0.0573935			0.421545	0.0570281			0.421545	0.0582757		0.421545	0.0593077		0.170347	0.0570824			0.2248	0.07323			0.421545	0.0631628			0.170347	0.0736373			0.421545	0.0664518			0.421545	0.074562			0.421545	0.0765653
0.425599	0.076642			0.425599	0.0718684			0.173057	0.0574342			0.425599	0.0569596			0.425599	0.0582545		0.425599	0.0592181		0.173057	0.0568668			0.2281	0.07364			0.425599	0.0630182			0.173057	0.0730449			0.425599	0.0664501			0.425599	0.074801			0.425599	0.0765227
0.429638	0.0763623			0.429638	0.0717633			0.175764	0.0572272			0.429638	0.0569742			0.429638	0.0582821		0.429638	0.0591954		0.175764	0.0570102			0.2315	0.07287			0.429638	0.0630316			0.175764	0.0729891			0.429638	0.0662852			0.429638	0.0745623			0.429638	0.0762081
0.433662	0.0762465			0.433662	0.0717038			0.178469	0.0573782			0.433662	0.0567895			0.433662	0.0581075		0.433662	0.0590848		0.178469	0.0570131			0.2349	0.07334			0.433662	0.0627428			0.178469	0.0733601			0.433662	0.0661834			0.433662	0.0742989			0.433662	0.0762326
0.43767	0.0761924			0.43767	0.0716335			0.181172	0.0574236			0.43767	0.0569789			0.43767	0.0582038		0.43767	0.0590851		0.181172	0.0568514			0.2382	0.07418			0.43767	0.0629323			0.181172	0.0730272			0.43767	0.0660997			0.43767	0.074466			0.43767	0.0761485
0.441662	0.0760409			0.441662	0.0715697			0.183871	0.0569375			0.441662	0.0568284			0.441662	0.0580915		0.441662	0.0590506		0.183871	0.0564402			0.2415	0.07302			0.441662	0.0626959			0.183871	0.0726981			0.441662	0.0661773			0.441662	0.0743576			0.441662	0.0760806
0.445638	0.0760101			0.445638	0.0714974			0.186568	0.0568004			0.445638	0.0568301			0.445638	0.0580676		0.445638	0.0588945		0.186568	0.0564897			0.2449	0.07321			0.445638	0.0626622			0.186568	0.0725943			0.445638	0.0658079			0.445638	0.0741128			0.445638	0.0758304
0.449599	0.0758562			0.449599	0.0711643			0.189261	0.0569857			0.449599	0.0567407			0.449599	0.0580019		0.449599	0.0587989		0.189261	0.0571216			0.2482	0.07332			0.449599	0.0624729			0.189261	0.0721286			0.449599	0.0657213			0.449599	0.0739552			0.449599	0.0758923
0.453544	0.0759282			0.453544	0.0712136			0.191952	0.056671			0.453544	0.0566172			0.453544	0.0578372		0.453544	0.0587981		0.191952	0.0564896			0.2515	0.07345			0.453544	0.0625626			0.191952	0.0713835			0.453544	0.0656591			0.453544	0.073811			0.453544	0.0757643
0.457473	0.0758419			0.457473	0.0711393			0.194641	0.0568726			0.457473	0.0565928			0.457473	0.0578924		0.457473	0.0588984		0.194641	0.056658			0.2548	0.07326			0.457473	0.0624684			0.194641	0.0711566			0.457473	0.0655526			0.457473	0.0739399			0.457473	0.0758667
0.461386	0.0755604			0.461386	0.0710555			0.197326	0.056911			0.461386	0.0565994			0.461386	0.0577592		0.461386	0.0586476		0.197326	0.0562151			0.2582	0.07313			0.461386	0.0623969			0.197326	0.0719613			0.461386	0.065429			0.461386	0.0737132			0.461386	0.0754062
0.465284	0.0755222			0.465284	0.0709824			0.200008	0.0564644			0.465284	0.0565131			0.465284	0.0577977		0.465284	0.0587081		0.200008	0.0567013			0.2615	0.07261			0.465284	0.0623517			0.200008	0.0714062			0.465284	0.0653088			0.465284	0.0738745			0.465284	0.0756437
0.469165	0.0755231			0.469165	0.0708476			0.202687	0.056697			0.469165	0.0565223			0.469165	0.05767		0.469165	0.058577		0.202687	0.056604			0.2648	0.07198			0.469165	0.0621435			0.202687	0.0710559			0.469165	0.0651244			0.469165	0.0737572			0.469165	0.0753577
0.47303	0.0754733			0.47303	0.0709934			0.205363	0.0569237			0.47303	0.0566319			0.47303	0.057726		0.47303	0.0587043		0.205363	0.0562159			0.2681	0.07209			0.47303	0.0621343			0.205363	0.0708546			0.47303	0.0651225			0.47303	0.0736749			0.47303	0.0753098
								0.208036	0.0562045													0.208036	0.0567793			0.2713	0.07229							0.208036	0.071129
								0.210706	0.0563743													0.210706	0.0564112			0.2746	0.07255							0.210706	0.0712481
								0.213373	0.0563158													0.213373	0.056281			0.2779	0.07201							0.213373	0.0710699
								0.216037	0.0566623													0.216037	0.0563688			0.2812	0.07296							0.216037	0.070323
								0.218697	0.0560482													0.218697	0.0565798			0.2844	0.0726							0.218697	0.0704743
								0.221355	0.0559352													0.221355	0.0560326			0.2877	0.07194							0.221355	0.0698712
								0.224008	0.0563948													0.224008	0.0562843			0.2909	0.07272							0.224008	0.0705727
								0.226659	0.0562425													0.226659	0.0560529			0.2942	0.07232							0.226659	0.0698357
								0.229306	0.0564837													0.229306	0.0561008			0.2974	0.07268							0.229306	0.0695044
								0.23195	0.0558996													0.23195	0.0561526			0.3006	0.0722							0.23195	0.0699618
								0.234591	0.0562377													0.234591	0.0561907			0.3039	0.07155							0.234591	0.0700347
								0.237228	0.0564931													0.237228	0.0558896			0.3071	0.07208							0.237228	0.0695948
								0.239862	0.0557464													0.239862	0.0561506			0.3103	0.07175							0.239862	0.0696977
								0.242492	0.0558472													0.242492	0.055845			0.3135	0.07152							0.242492	0.0692014
								0.245118	0.0557629													0.245118	0.055479			0.3167	0.07175							0.245118	0.0690618
								0.247741	0.0556918													0.247741	0.0555693			0.3199	0.07142							0.247741	0.0690936
								0.250361	0.0561545													0.250361	0.0559162			0.3231	0.07129							0.250361	0.0692772
								0.252977	0.056139													0.252977	0.0558064			0.3262	0.0713							0.252977	0.0690317
								0.255589	0.0555639													0.255589	0.0558446			0.3294	0.07119							0.255589	0.0689271
								0.258197	0.0555452													0.258197	0.0558507			0.3326	0.07142							0.258197	0.0687826
								0.260802	0.0553735													0.260802	0.0557249			0.3357	0.07106							0.260802	0.0682897
								0.263403	0.0556911													0.263403	0.0558043			0.3389	0.0713							0.263403	0.0681848
								0.266	0.0555074													0.266	0.0556709			0.342	0.07102							0.266	0.0683215
								0.268594	0.0557314													0.268594	0.0558586			0.3451	0.07109							0.268594	0.068621
								0.271184	0.056066													0.271184	0.0557335			0.3483	0.07097							0.271184	0.0681769
								0.273769	0.0556708													0.273769	0.05564			0.3514	0.07119							0.273769	0.0682951
								0.276351	0.0556051													0.276351	0.0555106			0.3545	0.07115							0.276351	0.0684414
								0.278929	0.0554136													0.278929	0.0558777			0.3576	0.06998							0.278929	0.0679887
								0.281503	0.0555836													0.281503	0.055379			0.3607	0.07058							0.281503	0.0680383
								0.284073	0.0554901													0.284073	0.0553216			0.3638	0.07084							0.284073	0.0681405
								0.28664	0.0556186													0.28664	0.055484			0.3669	0.07114							0.28664	0.0674576
								0.289202	0.0556266													0.289202	0.055423			0.3699	0.07069							0.289202	0.0678878
								0.29176	0.0551876													0.29176	0.0556013			0.373	0.07155							0.29176	0.067552
								0.294314	0.0558903													0.294314	0.0557601			0.3761	0.07121							0.294314	0.0678123
								0.296864	0.0550767													0.296864	0.0552536			0.3791	0.07047							0.296864	0.0673867
								0.29941	0.0556207													0.29941	0.0556222			0.3821	0.07071							0.29941	0.0677963
								0.301951	0.0553364													0.301951	0.0553753			0.3852	0.07069							0.301951	0.0677168
								0.304489	0.055205													0.304489	0.0553769			0.3882	0.07119							0.304489	0.0673161
								0.307022	0.0551457													0.307022	0.0557389			0.3912	0.07065							0.307022	0.0675082
								0.309551	0.0551427													0.309551	0.0551999			0.3942	0.07046							0.309551	0.0667748
								0.312076	0.0553053													0.312076	0.0553082			0.3972	0.07078							0.312076	0.0674744
								0.314597	0.0553923													0.314597	0.055312			0.4002	0.06951							0.314597	0.0673044
								0.317113	0.0551412													0.317113	0.0548305			0.4032	0.07098							0.317113	0.0669496
								0.319626	0.0553667													0.319626	0.055443			0.4062	0.07101							0.319626	0.0672765
								0.322133	0.0547985													0.322133	0.0550142			0.4092	0.0702							0.322133	0.0667939
								0.324637	0.0553559													0.324637	0.0552759			0.4121	0.06948							0.324637	0.0669347
								0.327136	0.0548269													0.327136	0.055063											0.327136	0.0666133
								0.32963	0.0552792													0.32963	0.0552075											0.32963	0.0666613
								0.332121	0.0549213													0.332121	0.0549897											0.332121	0.0665421
								0.334606	0.0552307													0.334606	0.0550322											0.334606	0.0664701
								0.337088	0.0553078													0.337088	0.0555891											0.337088	0.0668497
								0.339565	0.0550655													0.339565	0.0550215											0.339565	0.0665434
								0.342037	0.0553455													0.342037	0.0551159											0.342037	0.0663288
								0.344505	0.0549347													0.344505	0.0548556											0.344505	0.0661886
								0.346968	0.0553448													0.346968	0.0551701											0.346968	0.0669678
								0.349427	0.0553461													0.349427	0.0552129											0.349427	0.0665759
								0.351881	0.0552032													0.351881	0.0549059											0.351881	0.0663389
								0.354331	0.0545357													0.354331	0.055217											0.354331	0.0663886
								0.356776	0.0546418													0.356776	0.0551209											0.356776	0.0664659
								0.359216	0.0549817													0.359216	0.0550184											0.359216	0.0657678
								0.361652	0.0550515													0.361652	0.0550243											0.361652	0.0658856
								0.364083	0.0548255													0.364083	0.0551604											0.364083	0.0656178
								0.366509	0.0546963													0.366509	0.0550424											0.366509	0.0655655
								0.368931	0.0549579													0.368931	0.0549131											0.368931	0.0657355
								0.371348	0.054739													0.371348	0.0546873											0.371348	0.0666257
								0.373761	0.0547561													0.373761	0.0550388											0.373761	0.066021
								0.376168	0.0547695													0.376168	0.0556022											0.376168	0.0661772
								0.378571	0.0549245													0.378571	0.0550373											0.378571	0.0664175
								0.380969	0.0552904													0.380969	0.0550988											0.380969	0.0661302
								0.383362	0.0552637													0.383362	0.0547137											0.383362	0.0663202
								0.38575	0.0542178													0.38575	0.0548539											0.38575	0.0653607
								0.388134	0.055242													0.388134	0.0551058											0.388134	0.0655212
								0.390513	0.055467													0.390513	0.0553265											0.390513	0.0663241
								0.392887	0.0546472													0.392887	0.0548501											0.392887	0.0650619
								0.395256	0.0556897													0.395256	0.0551616											0.395256	0.0660997
								0.39762	0.0552296													0.39762	0.0548283											0.39762	0.0657702
								0.399979	0.0546419													0.399979	0.0553911											0.399979	0.0660675
								0.402334	0.0549619													0.402334	0.0547286											0.402334	0.0658782
								0.404683	0.0557409													0.404683	0.0553129											0.404683	0.0653289
								0.407028	0.0549073													0.407028	0.0547862											0.407028	0.0654416
								0.409367	0.0542956													0.409367	0.0546412											0.409367	0.0647975
								0.411702	0.0543869													0.411702	0.0547688											0.411702	0.0651602
								0.414032	0.0551944													0.414032	0.0551002											0.414032	0.0656014
								0.416357	0.0547446													0.416357	0.0550182											0.416357	0.0656505
								0.418676	0.0546752													0.418676	0.0548439											0.418676	0.0652004
								0.420991	0.0542628													0.420991	0.0549417											0.420991	0.0649245
								0.423301	0.055221													0.423301	0.0546095											0.423301	0.0661394
								0.425606	0.0542597													0.425606	0.0556066											0.425606	0.0658817
								0.427905	0.0548269													0.427905	0.0552088											0.427905	0.064857
								0.4302	0.0558107													0.4302	0.0559044											0.4302	0.0656104
								0.43249	0.0542652													0.43249	0.0555749											0.43249	0.065656
								0.434774	0.0545413													0.434774	0.0552395											0.434774	0.065121
								0.437054	0.0553662													0.437054	0.0555243											0.437054	0.0652126
								0.439328	0.0556034													0.439328	0.0549975											0.439328	0.065359
								0.441598	0.0549479													0.441598	0.0552243											0.441598	0.0667067
								0.443862	0.0568589													0.443862	0.0551935											0.443862	0.0670693
								0.446121	0.0546115													0.446121	0.0541374											0.446121	0.064717
								0.448375	0.0537146													0.448375	0.0558102											0.448375	0.0628451
								0.450624	0.0549186													0.450624	0.0545982											0.450624	0.0633545
								0.452868	0.0525834													0.452868	0.0551559											0.452868	0.0630884
[truncated: 70 more columns]

## Sheet: SAXS
	Beamline	IPC (in-house)			Beamline	IPC (in-house)			Beamline	IPC (in-house)			Beamline	IPC (in-house)			Beamline	IPC (in-house)			Beamline	IPC (in-house)					Beamline	IPC (in-house)			Beamline	IPC (in-house)			Beamline	IPC (in-house)			Beamline	IPC (in-house)			Beamline	IPC (in-house)				Beamline	Spring-8
	c [M]	0.13			c [M]	0.09			c [M]	0.065			c [M]	0.04			c [M]	0.027			c [M]	0.014					c [M]	0.009			c [M]	0.013			c [M]	0.018			c [M]	0.027			c [M]	0.039				c [M]	0.0421
	solvent	H2O			solvent	H2O			solvent	H2O			solvent	H2O			solvent	H2O			solvent	H2O					solvent	H2O			solvent	H2O			solvent	H2O			solvent	H2O			solvent	H2O				solvent	H2O
	polymer	TBACMC			polymer	TBACMC			polymer	TBACMC			polymer	TBACMC			polymer	TBACMC			polymer	TBACMC					polymer	TEACMC			polymer	TEACMC			polymer	TEACMC			polymer	TEACMC			polymer	TEACMC				polymer	TEACMC
	q [Å-1]	I [cm-1]			q [Å-1]	I [cm-1]			q [Å-1]	I [cm-1]			q [Å-1]	I [cm-1]			q [Å-1]	I [cm-1]			q [Å-1]	I [cm-1]					q [Å-1]	I [cm-1]			q [Å-1]	I [cm-1]			q [Å-1]	I [cm-1]			q [Å-1]	I [cm-1]			q [Å-1]	I [cm-1]				q [Å-1]	I [cm-1]
	0.000371606	-0.142536			0.000371606	-0.10767			0.000371606	-0.110986			0.000371606	-0.108062			0.000371606	-0.140398			0.000371606	-0.112952					0.000372818	-335331			0.000372818	-462057			0.000372818	-692176			0.000372818	-716188			0.000372818	-370787				0.000123288	0.352071
	0.00108637	-0.142536			0.00108637	-0.10767			0.00108637	-0.110986			0.00108637	-0.108062			0.00108637	-0.140398			0.00108637	-0.112952					0.00111846	-111050			0.00111846	-180320			0.00111846	-189462			0.00111846	-266407			0.00111846	-183654				0.000369865	0.0304075
	0.00180113	-0.142536			0.00180113	-0.10767			0.00180113	-0.110986			0.00180113	-0.108062			0.00180113	-0.140398			0.00180113	-0.112952					0.00186409	84301.9			0.00186409	128299			0.00186409	166656			0.00186409	199658			0.00186409	116482				0.000616442	0.21549
	0.0025159	-0.142536			0.0025159	-0.10767			0.0025159	-0.110986			0.0025159	-0.108062			0.0025159	-0.140398			0.0025159	-0.112952					0.00260973	27272.3			0.00260973	42208.3			0.00260973	50520			0.00260973	62334.2			0.00260973	40514.7				0.000863019	0.513204
	0.00323066	-0.142536			0.00323066	-0.10767			0.00323066	-0.110986			0.00323066	-0.108062			0.00323066	-0.140398			0.00323066	-0.112952					0.00335537	5525.71			0.00335537	5730.09			0.00335537	6195.83			0.00335537	7314.12			0.00335537	6245.97				0.0011096	0.466176
	0.00394542	0.0213664			0.00394542	0.107177			0.00394542	0.179785			0.00394542	0.147661			0.00394542	-0.0309941			0.00394542	0.00632848					0.004101	577.791			0.004101	448.817			0.004101	427.549			0.004101	444.375			0.004101	484.381				0.00135617	0.199285
	0.00466018	0.124076			0.00466018	0.123622			0.00466018	0.231001			0.00466018	0.242774			0.00466018	-0.0410508			0.00466018	0.0790032					0.00484664	27.9196			0.00484664	30.1919			0.00484664	29.9164			0.00484664	39.1362			0.00484664	32.0931				0.00160275	0.0555375
	0.00537495	0.169106			0.00537495	0.135479			0.00537495	0.0619786			0.00537495	0.248107			0.00537495	0.0230197			0.00537495	0.0779398					0.00559228	2.87277			0.00559228	2.67254			0.00559228	3.38465			0.00559228	4.25642			0.00559228	3.02119				0.00184933	-0.0146737
	0.00608971	0.153038			0.00608971	0.0617854			0.00608971	0.0823537			0.00608971	0.167317			0.00608971	0.0141611			0.00608971	-0.0207947					0.00633791	0.802651			0.00633791	0.599673			0.00633791	0.958426			0.00633791	1.32622			0.00633791	0.897377				0.0020959	0.0106559
	0.00680447	0.115768			0.00680447	0.0997241			0.00680447	0.0494818			0.00680447	0.127082			0.00680447	0.00472321			0.00680447	0.0318926					0.00708355	0.327234			0.00708355	0.230041			0.00708355	0.399634			0.00708355	0.64459			0.00708355	0.414719				0.00234248	0.0710173
	0.00751924	0.0793922			0.00751924	0.0518092			0.00751924	0.0740286			0.00751924	0.130755			0.00751924	0.0161656			0.00751924	0.0102508					0.00782919	0.1495			0.00782919	0.0970443			0.00782919	0.18634			0.00782919	0.38164			0.00782919	0.218576				0.00258906	0.0735195
	0.008234	0.103917			0.008234	0.0902714			0.008234	0.0327944			0.008234	0.115846			0.008234	0.0182796			0.008234	-0.00760045					0.00857482	0.119167			0.00857482	0.0938326			0.00857482	0.111047			0.00857482	0.287759			0.00857482	0.162777				0.00283563	-0.0270665
	0.00894876	0.0975034			0.00894876	0.105321			0.00894876	0.0927245			0.00894876	0.138144			0.00894876	0.0316589			0.00894876	0.0302776					0.00932046	0.0825979			0.00932046	0.0632442			0.00932046	0.0841575			0.00932046	0.201975			0.00932046	0.121718				0.00308221	-0.116546
	0.00966353	0.0827061			0.00966353	0.0573396			0.00966353	0.0823758			0.00966353	0.116833			0.00966353	0.0220966			0.00966353	0.0229011					0.0100661	0.0646044			0.0100661	0.05473			0.0100661	0.0806829			0.0100661	0.17064			0.0100661	0.0899613				0.00332879	0.0627975
	0.0103783	0.0851139			0.0103783	0.0655444			0.0103783	0.0536369			0.0103783	0.0899627			0.0103783	0.0239541			0.0103783	0.0298953					0.0108117	0.0583577			0.0108117	0.0660858			0.0108117	0.0604192			0.0108117	0.144553			0.0108117	0.0825408				0.00357536	1.02472
	0.0110931	0.0809208			0.0110931	0.0703483			0.0110931	0.0577288			0.0110931	0.0379208			0.0110931	0.0196076			0.0110931	0.0343181					0.0115574	0.0470534			0.0115574	0.0421368			0.0115574	0.0541155			0.0115574	0.114027			0.0115574	0.0651124				0.00382194	5.83941
	0.0118078	0.0755343			0.0118078	0.0817341			0.0118078	0.0669606			0.0118078	0.0834599			0.0118078	0.0168717			0.0118078	0.0261204					0.012303	0.0470792			0.012303	0.037594			0.012303	0.0535497			0.012303	0.0972364			0.012303	0.0552549				0.00406852	18.6832
	0.0125226	0.0718163			0.0125226	0.0658261			0.0125226	0.0536688			0.0125226	0.0502264			0.0125226	0.0334266			0.0125226	0.0311375					0.0130486	0.0379695			0.0130486	0.0382018			0.0130486	0.0495138			0.0130486	0.0837448			0.0130486	0.0534729				0.00431509	31.0666
	0.0132373	0.098604			0.0132373	0.0825577			0.0132373	0.0733717			0.0132373	0.0653488			0.0132373	0.0311859			0.0132373	0.0328856					0.0137943	0.0392376			0.0137943	0.0325662			0.0137943	0.0490714			0.0137943	0.0761699			0.0137943	0.0487352				0.00456167	38.8016
	0.0139521	0.0921864			0.0139521	0.050685			0.0139521	0.0403435			0.0139521	0.0406316			0.0139521	0.0249883			0.0139521	0.0430041					0.0145399	0.0498929			0.0145399	0.0332899			0.0145399	0.0394275			0.0145399	0.0807261			0.0145399	0.0421824				0.00480825	37.3518
	0.0146669	0.0608303			0.0146669	0.0529959			0.0146669	0.0600658			0.0146669	0.0466445			0.0146669	0.0088385			0.0146669	0.0205487					0.0152856	0.0329738			0.0152856	0.0272732			0.0152856	0.0516715			0.0152856	0.0669252			0.0152856	0.0471049				0.00505482	33.3149
	0.0153816	0.0757612			0.0153816	0.0763354			0.0153816	0.0555927			0.0153816	0.0550649			0.0153816	0.0546898			0.0153816	0.0230548					0.0160312	0.0360795			0.0160312	0.035097			0.0160312	0.0450992			0.0160312	0.0633074			0.0160312	0.0449743				0.0053014	31.3652
	0.0160964	0.0676834			0.0160964	0.0489086			0.0160964	0.0406402			0.0160964	0.0403339			0.0160964	0.0178292			0.0160964	0.0238408					0.0167768	0.0422947			0.0167768	0.0278562			0.0167768	0.0550644			0.0167768	0.0588457			0.0167768	0.0464112				0.00554798	28.7637
	0.0168112	0.0630043			0.0168112	0.0614729			0.0168112	0.0361065			0.0168112	0.0455031			0.0168112	0.0457149			0.0168112	0.0299203					0.0175225	0.0367104			0.0175225	0.0302614			0.0175225	0.0477303			0.0175225	0.0507941			0.0175225	0.0405887				0.00579455	23.392
	0.0175259	0.0666754			0.0175259	0.0743187			0.0175259	0.0632362			0.0175259	0.0457642			0.0175259	0.0382234			0.0175259	0.0181474					0.0182681	0.0385462			0.0182681	0.0282059			0.0182681	0.0433837			0.0182681	0.0527941			0.0182681	0.0451285				0.00604113	18.9137
	0.0182407	0.0606602			0.0182407	0.0548946			0.0182407	0.0350183			0.0182407	0.0347901			0.0182407	0.0362996			0.0182407	0.0172677					0.0190137	0.0366732			0.0190137	0.0331038			0.0190137	0.0461051			0.0190137	0.0512481			0.0190137	0.042927				0.00628771	16.8247
	0.0189554	0.0626297			0.0189554	0.0395355			0.0189554	0.0720302			0.0189554	0.0407565			0.0189554	0.0561911			0.0189554	0.0161791					0.0197594	0.0506354			0.0197594	0.033594			0.0197594	0.0485343			0.0197594	0.0592597			0.0197594	0.0443945				0.00653428	15.5597
	0.0196702	0.0695978			0.0196702	0.0559889			0.0196702	0.0242223			0.0196702	0.0356293			0.0196702	0.0235464			0.0196702	0.0143387					0.020505	0.048243			0.020505	0.0351368			0.020505	0.0548456			0.020505	0.0509391			0.020505	0.0476924				0.00678086	14.3539
	0.020385	0.0661607			0.020385	0.0509701			0.020385	0.0425105			0.020385	0.0425691			0.020385	0.0260118			0.020385	0.0206109					0.0212506	0.0398057			0.0212506	0.0341216			0.0212506	0.043546			0.0212506	0.0485575			0.0212506	0.0424278				0.00702744	13.4771
	0.0210997	0.0723817			0.0210997	0.0543153			0.0210997	0.0454557			0.0210997	0.0368248			0.0210997	0.0400467			0.0210997	0.0384753					0.0219963	0.04465			0.0219963	0.0332749			0.0219963	0.0451179			0.0219963	0.0436284			0.0219963	0.0337692				0.00727401	13.1251
	0.0218145	0.038398			0.0218145	0.0407302			0.0218145	0.0348347			0.0218145	0.0241708			0.0218145	0.0186647			0.0218145	0.0261911					0.0227419	0.0457512			0.0227419	0.0393949			0.0227419	0.0471395			0.0227419	0.0481644			0.0227419	0.0424674				0.00752059	12.5749
	0.0225293	0.0610203			0.0225293	0.0426166			0.0225293	0.0475455			0.0225293	0.026025			0.0225293	0.0193709			0.0225293	0.0295988					0.0234876	0.0430015			0.0234876	0.0326611			0.0234876	0.043512			0.0234876	0.0473938			0.0234876	0.0369989				0.00776716	11.7224
	0.023244	0.0618978			0.023244	0.0448387			0.023244	0.046802			0.023244	0.0218282			0.023244	0.0380833			0.023244	0.0416232					0.0242332	0.0386223			0.0242332	0.0344041			0.0242332	0.0441936			0.0242332	0.0452126			0.0242332	0.0409517				0.00801374	11.801
	0.0239588	0.0477956			0.0239588	0.0410518			0.0239588	0.0430361			0.0239588	0.0361195			0.0239588	0.0269451			0.0239588	0.0281595					0.0249788	0.039441			0.0249788	0.0329804			0.0249788	0.0432119			0.0249788	0.0478199			0.0249788	0.0358751				0.00826032	11.0919
	0.0246736	0.0450055			0.0246736	0.0443865			0.0246736	0.0451081			0.0246736	0.031813			0.0246736	0.0197676			0.0246736	0.030988					0.0257245	0.0405653			0.0257245	0.0375406			0.0257245	0.0474038			0.0257245	0.0397577			0.0257245	0.0407722				0.00850689	10.0088
	0.0253883	0.0623997			0.0253883	0.0491465			0.0253883	0.025832			0.0253883	0.0296775			0.0253883	0.02858			0.0253883	0.0324488					0.0264701	0.0457235			0.0264701	0.0378442			0.0264701	0.0440668			0.0264701	0.0436714			0.0264701	0.0387338				0.00875347	10.1395
	0.0261031	0.0592698			0.0261031	0.0517299			0.0261031	0.034555			0.0261031	0.0424481			0.0261031	0.0244838			0.0261031	0.0335504					0.0272157	0.0459214			0.0272157	0.038854			0.0272157	0.0486083			0.0272157	0.0450713			0.0272157	0.037726				0.00900005	10.0321
	0.0268179	0.0510446			0.0268179	0.0518111			0.0268179	0.0464207			0.0268179	0.0292983			0.0268179	0.0421339			0.0268179	0.0282666					0.0279614	0.0435531			0.0279614	0.0344144			0.0279614	0.0455817			0.0279614	0.0431797			0.0279614	0.0353501				0.00924662	9.54796
	0.0275326	0.0549299			0.0275326	0.0468699			0.0275326	0.0350978			0.0275326	0.0294896			0.0275326	0.0179828			0.0275326	0.0371767					0.028707	0.0497577			0.028707	0.0359194			0.028707	0.0474411			0.028707	0.0437342			0.028707	0.037124				0.0094932	8.79143
	0.0282474	0.0291633			0.0282474	0.0282449			0.0282474	0.0509937			0.0282474	0.0325214			0.0282474	0.0344861			0.0282474	0.0328694					0.0294527	0.0471678			0.0294527	0.0381748			0.0294527	0.0534741			0.0294527	0.0432275			0.0294527	0.0316927				0.00973977	8.67756
	0.0289621	0.0602302			0.0289621	0.0430116			0.0289621	0.0437188			0.0289621	0.0361952			0.0289621	0.037131			0.0289621	0.0321875					0.0301983	0.0482337			0.0301983	0.0401085			0.0301983	0.0475538			0.0301983	0.0445487			0.0301983	0.0372183				0.00998635	8.76717
	0.0296769	0.0528168			0.0296769	0.0524806			0.0296769	0.0521369			0.0296769	0.0316075			0.0296769	0.0457559			0.0296769	0.0344889					0.0309439	0.0470063			0.0309439	0.0366547			0.0309439	0.0499115			0.0309439	0.0463304			0.0309439	0.0372383				0.0102329	7.87852
	0.0303917	0.0541815			0.0303917	0.0383806			0.0303917	0.0516958			0.0303917	0.0395591			0.0303917	0.0505901			0.0303917	0.0363064					0.0316896	0.0435332			0.0316896	0.0373062			0.0316896	0.0515287			0.0316896	0.047973			0.0316896	0.036647				0.0104795	7.14502
	0.0311064	0.0613838			0.0311064	0.0604932			0.0311064	0.0421571			0.0311064	0.0471826			0.0311064	0.0457198			0.0311064	0.034491					0.0324352	0.0442909			0.0324352	0.0394362			0.0324352	0.0516579			0.0324352	0.0455781			0.0324352	0.0365419				0.0107261	7.17381
	0.0318212	0.0517184			0.0318212	0.03581			0.0318212	0.0399095			0.0318212	0.0322518			0.0318212	0.0341382			0.0318212	0.0283027					0.0331808	0.0439328			0.0331808	0.0412096			0.0331808	0.05463			0.0331808	0.0492434			0.0331808	0.0387359				0.0109727	6.97531
	0.032536	0.0432082			0.032536	0.0383894			0.032536	0.036572			0.032536	0.0448104			0.032536	0.0441119			0.032536	0.0342349					0.0339265	0.0452859			0.0339265	0.0423941			0.0339265	0.0569817			0.0339265	0.0484147			0.0339265	0.0373583				0.0112192	6.43061
	0.0332507	0.0539153			0.0332507	0.0459737			0.0332507	0.0311854			0.0332507	0.0311853			0.0332507	0.0347589			0.0332507	0.0395691					0.0346721	0.0464898			0.0346721	0.0390681			0.0346721	0.0562351			0.0346721	0.0540026			0.0346721	0.0420491				0.0114658	6.19707
	0.0339655	0.0493061			0.0339655	0.0427688			0.0339655	0.0412146			0.0339655	0.0303917			0.0339655	0.0484488			0.0339655	0.0410713					0.0354178	0.0433291			0.0354178	0.0401006			0.0354178	0.0614599			0.0354178	0.0552555			0.0354178	0.0406494				0.0117124	5.96238
	0.0346802	0.0492785			0.0346802	0.0473334			0.0346802	0.0481169			0.0346802	0.0292142			0.0346802	0.0363425			0.0346802	0.0356711					0.0361634	0.0437177			0.0361634	0.0437091			0.0361634	0.0562272			0.0361634	0.0528271			0.0361634	0.0398763				0.011959	5.66619
	0.035395	0.0458971			0.035395	0.0478955			0.035395	0.0473817			0.035395	0.0257054			0.035395	0.0412171			0.035395	0.0300377					0.036909	0.042042			0.036909	0.0424595			0.036909	0.0604445			0.036909	0.051484			0.036909	0.0407534				0.0122055	6.1107
	0.0361098	0.0562427			0.0361098	0.044837			0.0361098	0.0420514			0.0361098	0.0343133			0.0361098	0.032661			0.0361098	0.0416048					0.0376547	0.0397697			0.0376547	0.046845			0.0376547	0.0610563			0.0376547	0.0501645			0.0376547	0.0430851				0.0124521	6.60133
	0.0368245	0.052377			0.0368245	0.0432508			0.0368245	0.0334903			0.0368245	0.0415603			0.0368245	0.0397924			0.0368245	0.0393033					0.0384003	0.0416973			0.0384003	0.0420195			0.0384003	0.0619843			0.0384003	0.0553847			0.0384003	0.0424688				0.0126987	6.07489
	0.0375393	0.048325			0.0375393	0.0443637			0.0375393	0.047373			0.0375393	0.0471648			0.0375393	0.0494			0.0375393	0.0368355					0.0391459	0.0408785			0.0391459	0.0437226			0.0391459	0.0640691			0.0391459	0.0552396			0.0391459	0.045673				0.0129453	5.34
	0.0382541	0.0486752			0.0382541	0.0401604			0.0382541	0.0546207			0.0382541	0.0272726			0.0382541	0.0458118			0.0382541	0.0277138					0.0398916	0.0404983			0.0398916	0.0394979			0.0398916	0.06913			0.0398916	0.0548752			0.0398916	0.0474355				0.0131918	5.3187
	0.0389688	0.0540148			0.0389688	0.0448099			0.0389688	0.0555348			0.0389688	0.0360155			0.0389688	0.0464272			0.0389688	0.038245					0.0406372	0.0410957			0.0406372	0.0417998			0.0406372	0.0612093			0.0406372	0.0549371			0.0406372	0.049004				0.0134384	5.15878
	0.0396836	0.0522635			0.0396836	0.0389037			0.0396836	0.0460287			0.0396836	0.0313951			0.0396836	0.0473167			0.0396836	0.0400331					0.0413828	0.0388666			0.0413828	0.0406635			0.0413828	0.0633532			0.0413828	0.0536426			0.0413828	0.0509822				0.013685	5.14856
	0.0403983	0.0617891			0.0403983	0.0422368			0.0403983	0.0640436			0.0403983	0.048577			0.0403983	0.0559316			0.0403983	0.0519294					0.0421285	0.0361933			0.0421285	0.0409506			0.0421285	0.0651046			0.0421285	0.0603884			0.0421285	0.0462292				0.0139316	5.38
	0.0411131	0.03531			0.0411131	0.0427604			0.0411131	0.050437			0.0411131	0.0308867			0.0411131	0.0525963			0.0411131	0.0276577					0.0428741	0.0392096			0.0428741	0.0423215			0.0428741	0.0661304			0.0428741	0.0558784			0.0428741	0.0466449				0.0141781	5.35948
	0.0418279	0.0435629			0.0418279	0.0487058			0.0418279	0.0380191			0.0418279	0.0355481			0.0418279	0.0499026			0.0418279	0.0452887					0.0436198	0.0376083			0.0436198	0.0422083			0.0436198	0.0656078			0.0436198	0.0610171			0.0436198	0.0510758				0.0144247	5.59225
	0.0425426	0.0500824			0.0425426	0.0575872			0.0425426	0.0525524			0.0425426	0.0607415			0.0425426	0.0524876			0.0425426	0.0428747					0.0443654	0.036694			0.0443654	0.0405622			0.0443654	0.0648632			0.0443654	0.0617562			0.0443654	0.0490843				0.0146713	5.73615
	0.0432574	0.0532668			0.0432574	0.0520579			0.0432574	0.047079			0.0432574	0.0422347			0.0432574	0.0641334			0.0432574	0.0332586					0.045111	0.0410214			0.045111	0.0394368			0.045111	0.0705804			0.045111	0.0597983			0.045111	0.0511653				0.0149179	5.25849
	0.0439722	0.0425048			0.0439722	0.0565022			0.0439722	0.0446715			0.0439722	0.0399236			0.0439722	0.0624088			0.0439722	0.0379366					0.0458567	0.0382453			0.0458567	0.03975			0.0458567	0.0663259			0.0458567	0.0657915			0.0458567	0.0517547				0.0151644	4.90249
	0.0446869	0.045488			0.0446869	0.0581265			0.0446869	0.0487077			0.0446869	0.0354753			0.0446869	0.0638517			0.0446869	0.037397					0.0466023	0.0383902			0.0466023	0.0379074			0.0466023	0.0637026			0.0466023	0.062889			0.0466023	0.0542825				0.015411	4.89962
	0.0454017	0.0487546			0.0454017	0.0373183			0.0454017	0.0488737			0.0454017	0.0466404			0.0454017	0.0493246			0.0454017	0.0346806					0.0473479	0.0368346			0.0473479	0.0392627			0.0473479	0.0634948			0.0473479	0.0639389			0.0473479	0.054181				0.0156576	4.97377
	0.0461165	0.0523465			0.0461165	0.0514525			0.0461165	0.0385009			0.0461165	0.046078			0.0461165	0.0623663			0.0461165	0.0451534					0.0480936	0.0376162			0.0480936	0.0382997			0.0480936	0.0607508			0.0480936	0.0623682			0.0480936	0.0553345				0.0159042	5.04016
	0.0468312	0.0415458			0.0468312	0.0540131			0.0468312	0.0535443			0.0468312	0.0448649			0.0468312	0.0523988			0.0468312	0.0383818					0.0488392	0.0376924			0.0488392	0.0374398			0.0488392	0.0597188			0.0488392	0.0641729			0.0488392	0.0579398				0.0161507	5.09902
	0.047546	0.0386165			0.047546	0.0488479			0.047546	0.0525775			0.047546	0.0367896			0.047546	0.0531488			0.047546	0.042722					0.0495848	0.0379485			0.0495848	0.0392098			0.0495848	0.0640178			0.0495848	0.0652278			0.0495848	0.060041				0.0163973	5.24269
	0.0482607	0.060146			0.0482607	0.0535379			0.0482607	0.0527721			0.0482607	0.0524407			0.0482607	0.0549347			0.0482607	0.0425895					0.0503305	0.0390484			0.0503305	0.0379574			0.0503305	0.0582788			0.0503305	0.0704195			0.0503305	0.0586145				0.0166439	5.45839
	0.0489755	0.0623575			0.0489755	0.0461202			0.0489755	0.0470965			0.0489755	0.0469335			0.0489755	0.0627507			0.0489755	0.0391347					0.0510761	0.0389149			0.0510761	0.0376138			0.0510761	0.06108			0.0510761	0.0654084			0.0510761	0.0632437				0.0168905	5.58573
	0.0496903	0.0505472			0.0496903	0.04703			0.0496903	0.0504358			0.0496903	0.0397734			0.0496903	0.0616355			0.0496903	0.0401896					0.0518218	0.0406141			0.0518218	0.036668			0.0518218	0.0577748			0.0518218	0.0723675			0.0518218	0.0631811				0.017137	5.51226
	0.050405	0.0537281			0.050405	0.053153			0.050405	0.0429301			0.050405	0.0537544			0.050405	0.0624214			0.050405	0.0363279					0.0525674	0.0410469			0.0525674	0.0363848			0.0525674	0.0626246			0.0525674	0.0740305			0.0525674	0.0638758				0.0173836	5.48562
	0.0511198	0.051383			0.0511198	0.0467663			0.0511198	0.0461706			0.0511198	0.0353168			0.0511198	0.0629653			0.0511198	0.0408061					0.053313	0.03767			0.053313	0.0355597			0.053313	0.0579229			0.053313	0.0678031			0.053313	0.0635853				0.0176302	5.44965
	0.0518346	0.043646			0.0518346	0.0433894			0.0518346	0.0624962			0.0518346	0.0536706			0.0518346	0.0566289			0.0518346	0.0392528					0.0540587	0.0397297			0.0540587	0.0355208			0.0540587	0.059953			0.0540587	0.0731622			0.0540587	0.0657975				0.0178768	5.13237
	0.0525493	0.039629			0.0525493	0.0482632			0.0525493	0.0378678			0.0525493	0.0433328			0.0525493	0.0611948			0.0525493	0.0352124					0.0548043	0.0406715			0.0548043	0.035158			0.0548043	0.058728			0.0548043	0.0664326			0.0548043	0.0692353				0.0181233	4.99758
	0.0532641	0.0596403			0.0532641	0.0552302			0.0532641	0.0523791			0.0532641	0.0584935			0.0532641	0.0655338			0.0532641	0.0416939					0.0555499	0.0400547			0.0555499	0.038462			0.0555499	0.0575532			0.0555499	0.0681332			0.0555499	0.0658163				0.0183699	5.20383
	0.0539789	0.0451689			0.0539789	0.0421463			0.0539789	0.0519108			0.0539789	0.0437129			0.0539789	0.0606407			0.0539789	0.0367508					0.0562956	0.0369476			0.0562956	0.0360786			0.0562956	0.0621515			0.0562956	0.0741737			0.0562956	0.0660685				0.0186165	5.21403
	0.0546936	0.0414635			0.0546936	0.0498961			0.0546936	0.0606951			0.0546936	0.0570182			0.0546936	0.0585113			0.0546936	0.0434898					0.0570412	0.0402664			0.0570412	0.0330749			0.0570412	0.0583644			0.0570412	0.0703461			0.0570412	0.0673341				0.0188631	4.88582
	0.0554084	0.0432422			0.0554084	0.0495516			0.0554084	0.0468476			0.0554084	0.0591675			0.0554084	0.0635815			0.0554084	0.0348735					0.0577869	0.0340025			0.0577869	0.0343273			0.0577869	0.0557954			0.0577869	0.0723385			0.0577869	0.0640956				0.0191096	4.82336
	0.0561231	0.0598154			0.0561231	0.0584415			0.0561231	0.0490456			0.0561231	0.058383			0.0561231	0.0697162			0.0561231	0.0359572					0.0585325	0.0366518			0.0585325	0.0358314			0.0585325	0.0599292			0.0585325	0.0695608			0.0585325	0.0647268				0.0193562	5.09157
	0.0568379	0.0602085			0.0568379	0.05011			0.0568379	0.0541447			0.0568379	0.050628			0.0568379	0.0601308			0.0568379	0.0315169					0.0592781	0.0393515			0.0592781	0.0341173			0.0592781	0.0558164			0.0592781	0.06757			0.0592781	0.0659394				0.0196028	5.20833
	0.0575527	0.0432225			0.0575527	0.0562902			0.0575527	0.0539117			0.0575527	0.0600279			0.0575527	0.0598173			0.0575527	0.0372599					0.0600238	0.0401937			0.0600238	0.0352569			0.0600238	0.05764			0.0600238	0.0670508			0.0600238	0.0697538				0.0198494	5.17211
	0.0582674	0.0534383			0.0582674	0.0507146			0.0582674	0.0651652			0.0582674	0.0609399			0.0582674	0.0703389			0.0582674	0.0370977					0.0607694	0.0389161			0.0607694	0.0333397			0.0607694	0.0566543			0.0607694	0.066977			0.0607694	0.0665521				0.0200959	5.07639
	0.0589822	0.0415613			0.0589822	0.0577323			0.0589822	0.0616479			0.0589822	0.0567311			0.0589822	0.0682428			0.0589822	0.0297398					0.061515	0.0389551			0.061515	0.0333632			0.061515	0.0556153			0.061515	0.0663061			0.061515	0.0695727				0.0203425	5.12247
	0.059697	0.0550907			0.059697	0.0514292			0.059697	0.0595164			0.059697	0.0560363			0.059697	0.0574463			0.059697	0.0331844					0.0622607	0.0421068			0.0622607	0.0361437			0.0622607	0.055247			0.0622607	0.0661212			0.0622607	0.0690708				0.0205891	5.46625
	0.0604117	0.0561369			0.0604117	0.0481609			0.0604117	0.0589959			0.0604117	0.0521902			0.0604117	0.0571968			0.0604117	0.0382298					0.0630063	0.0394431			0.0630063	0.0335307			0.0630063	0.0554506			0.0630063	0.0637585			0.0630063	0.0692974				0.0208357	5.71555
	0.0611265	0.0515227			0.0611265	0.0558841			0.0611265	0.0559519			0.0611265	0.0514338			0.0611265	0.0678359			0.0611265	0.0367011					0.0637519	0.0398626			0.0637519	0.0337956			0.0637519	0.0556185			0.0637519	0.0646843			0.0637519	0.0676604				0.0210822	5.54142
	0.0618413	0.0574023			0.0618413	0.0614964			0.0618413	0.0560615			0.0618413	0.057804			0.0618413	0.0645047			0.0618413	0.0389917					0.0644976	0.0402269			0.0644976	0.03377			0.0644976	0.0541803			0.0644976	0.067329			0.0644976	0.0668885				0.0213288	5.16766
	0.062556	0.0574448			0.062556	0.0505711			0.062556	0.0653184			0.062556	0.0502963			0.062556	0.0568035			0.062556	0.0280137					0.0652432	0.041059			0.0652432	0.0352505			0.0652432	0.0538949			0.0652432	0.0631388			0.0652432	0.0646129				0.0215754	4.90883
	0.0632708	0.0510049			0.0632708	0.0610779			0.0632708	0.054675			0.0632708	0.0619068			0.0632708	0.0672762			0.0632708	0.0378089					0.0659889	0.0389347			0.0659889	0.0343028			0.0659889	0.0604075			0.0659889	0.0637809			0.0659889	0.067156				0.0218219	4.80934
	0.0639855	0.0514074			0.0639855	0.0512707			0.0639855	0.050648			0.0639855	0.0608837			0.0639855	0.059796			0.0639855	0.0257076					0.0667345	0.0384554			0.0667345	0.0334413			0.0667345	0.0548005			0.0667345	0.062664			0.0667345	0.067038				0.0220685	4.91343
	0.0647003	0.0712828			0.0647003	0.0637664			0.0647003	0.0770939			0.0647003	0.0700013			0.0647003	0.0614245			0.0647003	0.0379679					0.0674801	0.0367442			0.0674801	0.0316273			0.0674801	0.0559122			0.0674801	0.0623167			0.0674801	0.0668654				0.0223151	5.1639
	0.0654151	0.0549959			0.0654151	0.0557772			0.0654151	0.0573677			0.0654151	0.056489			0.0654151	0.0630621			0.0654151	0.0296186					0.0682258	0.0350455			0.0682258	0.0321412			0.0682258	0.0541329			0.0682258	0.0621416			0.0682258	0.065832				0.0225617	5.19638
	0.0661298	0.0552176			0.0661298	0.0633029			0.0661298	0.0649041			0.0661298	0.0548413			0.0661298	0.0637796			0.0661298	0.0268705					0.0689714	0.0379053			0.0689714	0.0332964			0.0689714	0.0536057			0.0689714	0.0588308			0.0689714	0.0686003				0.0228082	4.99332
	0.0668446	0.062255			0.0668446	0.0621466			0.0668446	0.0559063			0.0668446	0.0682184			0.0668446	0.0573703			0.0668446	0.0285054					0.069717	0.0358305			0.069717	0.033533			0.069717	0.0512712			0.069717	0.0657321			0.069717	0.0652247				0.0230548	4.88265
	0.0675594	0.0548391			0.0675594	0.0585427			0.0675594	0.0708398			0.0675594	0.0573954			0.0675594	0.0647551			0.0675594	0.0312597					0.0704627	0.0358437			0.0704627	0.0324401			0.0704627	0.0515678			0.0704627	0.0585038			0.0704627	0.0630359				0.0233014	5.04673
	0.0682741	0.0585032			0.0682741	0.0621768			0.0682741	0.067189			0.0682741	0.0636764			0.0682741	0.0640852			0.0682741	0.027646					0.0712083	0.0403701			0.0712083	0.0326245			0.0712083	0.0519245			0.0712083	0.0599219			0.0712083	0.0680013				0.023548	5.22502
	0.0689889	0.0476809			0.0689889	0.0527934			0.0689889	0.0579314			0.0689889	0.062886			0.0689889	0.0491108			0.0689889	0.0302607					0.071954	0.0389644			0.071954	0.0339037			0.071954	0.0555486			0.071954	0.0597887			0.071954	0.0652003				0.0237945	5.28771
	0.0697036	0.0691585			0.0697036	0.0609577			0.0697036	0.0651036			0.0697036	0.0724424			0.0697036	0.0550465			0.0697036	0.0349856					0.0726996	0.0362537			0.0726996	0.0336464			0.0726996	0.0476467			0.0726996	0.0555774			0.0726996	0.0654547				0.0240411	5.3179
	0.0704184	0.0664085			0.0704184	0.0542939			0.0704184	0.0714775			0.0704184	0.0616018			0.0704184	0.0515912			0.0704184	0.0266602					0.0734452	0.0383693			0.0734452	0.0330106			0.0734452	0.0530772			0.0734452	0.0572457			0.0734452	0.063982				0.0242877	5.28057
	0.0711332	0.0616171			0.0711332	0.0654818			0.0711332	0.0619639			0.0711332	0.0584797			0.0711332	0.0566779			0.0711332	0.0285578					0.0741909	0.0377315			0.0741909	0.0303849			0.0741909	0.0516796			0.0741909	0.0587631			0.0741909	0.0612742				0.0245343	5.18424
	0.0718479	0.0708684			0.0718479	0.0615112			0.0718479	0.0688819			0.0718479	0.0648296			0.0718479	0.0464026			0.0718479	0.0245267					0.0749365	0.0379587			0.0749365	0.033215			0.0749365	0.0530751			0.0749365	0.0570809			0.0749365	0.0611503				0.0247808	5.11884
	0.0725627	0.0607799			0.0725627	0.0629583			0.0725627	0.0710802			0.0725627	0.0563897			0.0725627	0.0487448			0.0725627	0.0293813					0.0756821	0.0357925			0.0756821	0.032133			0.0756821	0.0504751			0.0756821	0.0568537			0.0756821	0.0615363				0.0250274	5.13457
	0.0732775	0.0641205			0.0732775	0.0644318			0.0732775	0.0738703			0.0732775	0.0635494			0.0732775	0.0553111			0.0732775	0.0294455					0.0764278	0.0361828			0.0764278	0.0321995			0.0764278	0.0520074			0.0764278	0.0563939			0.0764278	0.0613287				0.025274	5.2125
	0.0739922	0.0610761			0.0739922	0.0613504			0.0739922	0.0618528			0.0739922	0.0576995			0.0739922	0.0483679			0.0739922	0.0308419					0.0771734	0.0387691			0.0771734	0.0312767			0.0771734	0.0538923			0.0771734	0.0568402			0.0771734	0.0616547				0.0255205	5.30816
	0.074707	0.0648483			0.074707	0.0626051			0.074707	0.0680517			0.074707	0.0613786			0.074707	0.0522193			0.074707	0.0285505					0.077919	0.0360187			0.077919	0.0309968			0.077919	0.0485064			0.077919	0.0567771			0.077919	0.0606436				0.0257671	5.38677
	0.0754217	0.0670759			0.0754217	0.073187			0.0754217	0.0757596			0.0754217	0.0671938			0.0754217	0.0531762			0.0754217	0.0317768					0.0786647	0.0357206			0.0786647	0.0316258			0.0786647	0.0471975			0.0786647	0.056203			0.0786647	0.0605091				0.0260137	5.51501
	0.0761365	0.0716091			0.0761365	0.0606634			0.0761365	0.0726806			0.0761365	0.0644577			0.0761365	0.0536293			0.0761365	0.0203393					0.0794103	0.0372377			0.0794103	0.0308827			0.0794103	0.0504077			0.0794103	0.0549148			0.0794103	0.0569379				0.0262603	5.63439
	0.0768513	0.065335			0.0768513	0.0632278			0.0768513	0.0753952			0.0768513	0.0550655			0.0768513	0.0487727			0.0768513	0.0300878					0.080156	0.0351276			0.080156	0.0304598			0.080156	0.0505187			0.080156	0.0548058			0.080156	0.0561261				0.0265068	5.53674
	0.077566	0.0574781			0.077566	0.0689025			0.077566	0.0710231			0.077566	0.0492269			0.077566	0.0430156			0.077566	0.0338219					0.0809016	0.0378905			0.0809016	0.0311278			0.0809016	0.0501687			0.0809016	0.051863			0.0809016	0.0577689				0.0267534	5.17951
	0.0782808	0.0641011			0.0782808	0.0675432			0.0782808	0.0692747			0.0782808	0.063017			0.0782808	0.0549236			0.0782808	0.0286322					0.0816472	0.0351193			0.0816472	0.0304669			0.0816472	0.048932			0.0816472	0.0531116			0.0816472	0.0591029				0.027	4.88364
	0.0789956	0.0681582			0.0789956	0.0715979			0.0789956	0.0684663			0.0789956	0.0506155			0.0789956	0.0371641			0.0789956	0.0235441					0.0823929	0.0351701			0.0823929	0.0307703			0.0823929	0.0485315			0.0823929	0.0532048			0.0823929	0.0578632				0.0272465	4.90667
	0.0797103	0.057884			0.0797103	0.0704251			0.0797103	0.0681818			0.0797103	0.0525935			0.0797103	0.0448187			0.0797103	0.0272246					0.0831385	0.0363694			0.0831385	0.0284915			0.0831385	0.0488714			0.0831385	0.0490865			0.0831385	0.0551634				0.0274931	5.17312
	0.0804251	0.0698844			0.0804251	0.0660695			0.0804251	0.0740918			0.0804251	0.0553684			0.0804251	0.0491306			0.0804251	0.0299901					0.0838841	0.0349444			0.0838841	0.0300216			0.0838841	0.0515868			0.0838841	0.0536754			0.0838841	0.0538948				0.0277397	5.37847
	0.0811398	0.0633335			0.0811398	0.0736431			0.0811398	0.0839779			0.0811398	0.0665151			0.0811398	0.0520004			0.0811398	0.0315987					0.0846298	0.036465			0.0846298	0.0302828			0.0846298	0.0497011			0.0846298	0.0548076			0.0846298	0.0538299				0.0279863	5.41197
	0.0818546	0.069452			0.0818546	0.073089			0.0818546	0.06734			0.0818546	0.0454926			0.0818546	0.0487831			0.0818546	0.0217465					0.0853754	0.0334692			0.0853754	0.0305999			0.0853754	0.0479363			0.0853754	0.0499384			0.0853754	0.0549212				0.0282328	5.31902
	0.0825694	0.0614939			0.0825694	0.0704216			0.0825694	0.0723844			0.0825694	0.0600659			0.0825694	0.0393675			0.0825694	0.0308074					0.0861211	0.036311			0.0861211	0.0288945			0.0861211	0.0466722			0.0861211	0.051244			0.0861211	0.0521146				0.0284794	5.19278
	0.0832841	0.0713066			0.0832841	0.0710989			0.0832841	0.0735493			0.0832841	0.0505355			0.0832841	0.0490736			0.0832841	0.0313811					0.0868667	0.0336122			0.0868667	0.0294295			0.0868667	0.0515391			0.0868667	0.0502015			0.0868667	0.0524655				0.028726	5.16978
	0.0839989	0.0731547			0.0839989	0.0720773			0.0839989	0.0756575			0.0839989	0.0550356			0.0839989	0.0432479			0.0839989	0.0272792					0.0876123	0.0321135			0.0876123	0.0284595			0.0876123	0.0453259			0.0876123	0.0513925			0.0876123	0.0511213				0.0289725	5.24566
	0.0847137	0.090837			0.0847137	0.0761983			0.0847137	0.0776146			0.0847137	0.056069			0.0847137	0.0400052			0.0847137	0.0331883					0.088358	0.0343792			0.088358	0.0285121			0.088358	0.0457327			0.088358	0.0507093			0.088358	0.0534814				0.0292191	5.28826
	0.0854284	0.0797515			0.0854284	0.0750696			0.0854284	0.0758289			0.0854284	0.0420387			0.0854284	0.042734			0.0854284	0.02456					0.0891036	0.0345982			0.0891036	0.0280455			0.0891036	0.0467747			0.0891036	0.0508696			0.0891036	0.0499987				0.0294657	5.24138
	0.0861432	0.062418			0.0861432	0.0731601			0.0861432	0.0760629			0.0861432	0.0591619			0.0861432	0.0414467			0.0861432	0.0211763					0.0898492	0.0354014			0.0898492	0.0303349			0.0898492	0.0471937			0.0898492	0.0487961			0.0898492	0.0498326				0.0297123	5.35796
	0.086858	0.0716825			0.086858	0.0642064			0.086858	0.0691555			0.086858	0.0517136			0.086858	0.0369459			0.086858	0.0299521					0.0905949	0.0354028			0.0905949	0.0296304			0.0905949	0.0473357			0.0905949	0.0467724			0.0905949	0.0515316				0.0299588	5.59478
	0.0875727	0.0730076			0.0875727	0.081385			0.0875727	0.0784085			0.0875727	0.0516551			0.0875727	0.0355415			0.0875727	0.026724					0.0913405	0.0349214			0.0913405	0.02762			0.0913405	0.0473225			0.0913405	0.0505239			0.0913405	0.0491853				0.0302054	5.70002
	0.0882875	0.0720192			0.0882875	0.0738283			0.0882875	0.0743941			0.0882875	0.0504623			0.0882875	0.0406333			0.0882875	0.0232525					0.0920862	0.0332237			0.0920862	0.0290948			0.0920862	0.0477715			0.0920862	0.0501074			0.0920862	0.0478327				0.030452	5.55726
	0.0890023	0.082826			0.0890023	0.0806527			0.0890023	0.0786167			0.0890023	0.0475033			0.0890023	0.0508383			0.0890023	0.0308678					0.0928318	0.0347529			0.0928318	0.029137			0.0928318	0.0464823			0.0928318	0.0461086			0.0928318	0.0475221				0.0306985	5.42661
	0.089717	0.07041			0.089717	0.0723218			0.089717	0.0719638			0.089717	0.050543			0.089717	0.041502			0.089717	0.0304265					0.0935774	0.0333222			0.0935774	0.0278012			0.0935774	0.0446918			0.0935774	0.0454393			0.0935774	0.0475664				0.0309451	5.4495
	0.0904318	0.069588			0.0904318	0.0817592			0.0904318	0.0746293			0.0904318	0.0515781			0.0904318	0.0387645			0.0904318	0.027154					0.0943231	0.0332207			0.0943231	0.0291258			0.0943231	0.0465691			0.0943231	0.0490773			0.0943231	0.0475747				0.0311917	5.35579
	0.0911465	0.0869433			0.0911465	0.0781642			0.0911465	0.0805111			0.0911465	0.0600849			0.0911465	0.042203			0.0911465	0.0292466					0.0950687	0.0329949			0.0950687	0.0269819			0.0950687	0.0461629			0.0950687	0.0473234			0.0950687	0.047227				0.0314382	5.18703
	0.0918613	0.0800612			0.0918613	0.0664356			0.0918613	0.0683847			0.0918613	0.040505			0.0918613	0.041491			0.0918613	0.025508					0.0958143	0.0319315			0.0958143	0.0271605			0.0958143	0.0455218			0.0958143	0.046801			0.0958143	0.0473581				0.0316848	5.29782
	0.0925761	0.0699675			0.0925761	0.0766781			0.0925761	0.0719875			0.0925761	0.0480378			0.0925761	0.0499794			0.0925761	0.029157					0.09656	0.0322138			0.09656	0.0271035			0.09656	0.04403			0.09656	0.0470448			0.09656	0.0482969				0.0319314	5.52748
	0.0932908	0.0861526			0.0932908	0.08399			0.0932908	0.0900805			0.0932908	0.0444222			0.0932908	0.0401588			0.0932908	0.0274698					0.0973056	0.0329756			0.0973056	0.0287853			0.0973056	0.0458984			0.0973056	0.0471302			0.0973056	0.0477727				0.032178	5.65108
	0.0940056	0.0717692			0.0940056	0.07519			0.0940056	0.0696178			0.0940056	0.0590807			0.0940056	0.0476847			0.0940056	0.0332998					0.0980512	0.0327737			0.0980512	0.0274459			0.0980512	0.0453637			0.0980512	0.0449207			0.0980512	0.0453892				0.0324245	5.71199
	0.0947204	0.0799183			0.0947204	0.0839103			0.0947204	0.0723354			0.0947204	0.0493114			0.0947204	0.04371			0.0947204	0.023642					0.0987969	0.0325495			0.0987969	0.02817			0.0987969	0.0430051			0.0987969	0.0473803			0.0987969	0.0440445				0.0326711	5.66426
	0.0954351	0.0837483			0.0954351	0.0814407			0.0954351	0.0762508			0.0954351	0.0413537			0.0954351	0.0389466			0.0954351	0.0275089					0.0995425	0.0331614			0.0995425	0.0279935			0.0995425	0.0439388			0.0995425	0.0470143			0.0995425	0.0448791				0.0329177	5.51498
	0.0961499	0.0827111			0.0961499	0.0861356			0.0961499	0.076628			0.0961499	0.0495707			0.0961499	0.0521827			0.0961499	0.0261582					0.100288	0.0311404			0.100288	0.0262551			0.100288	0.0437253			0.100288	0.045594			0.100288	0.0475078				0.0331642	5.50244
	0.0968646	0.0773081			0.0968646	0.0829039			0.0968646	0.0735113			0.0968646	0.0412798			0.0968646	0.0435746			0.0968646	0.0299381					0.101034	0.0316593			0.101034	0.0258378			0.101034	0.0421648			0.101034	0.0467563			0.101034	0.0466688				0.0334108	5.68655
	0.0975794	0.0893195			0.0975794	0.0827178			0.0975794	0.0762611			0.0975794	0.0488128			0.0975794	0.0442452			0.0975794	0.0279007					0.101779	0.0322886			0.101779	0.0277941			0.101779	0.0433888			0.101779	0.0448855			0.101779	0.0468817				0.0336574	5.74451
	0.0982942	0.0874785			0.0982942	0.0792562			0.0982942	0.0700505			0.0982942	0.0437155			0.0982942	0.0360291			0.0982942	0.0261548					0.102525	0.030013			0.102525	0.026186			0.102525	0.0423777			0.102525	0.0461478			0.102525	0.0439245				0.0339039	5.56407
	0.0990089	0.0855988			0.0990089	0.086763			0.0990089	0.0731685			0.0990089	0.0522349			0.0990089	0.0520249			0.0990089	0.0269349					0.103271	0.0303527			0.103271	0.0258789			0.103271	0.0439891			0.103271	0.0444781			0.103271	0.0433529				0.0341505	5.43789
	0.0997237	0.0890211			0.0997237	0.0874686			0.0997237	0.0742257			0.0997237	0.047361			0.0997237	0.0487714			0.0997237	0.0254214					0.104016	0.0314373			0.104016	0.0248755			0.104016	0.0437321			0.104016	0.0431478			0.104016	0.0442593				0.0343971	5.5654
	0.100439	0.0792767			0.100439	0.0758927			0.100439	0.0676537			0.100439	0.0396857			0.100439	0.0421021			0.100439	0.0227619					0.104762	0.0305117			0.104762	0.0268537			0.104762	0.0417499			0.104762	0.0431224			0.104762	0.0424811				0.0346436	5.67641
	0.101153	0.0905729			0.101153	0.0781879			0.101153	0.0720967			0.101153	0.0524586			0.101153	0.0406609			0.101153	0.030549					0.105508	0.031519			0.105508	0.0277963			0.105508	0.043732			0.105508	0.0428957			0.105508	0.0426888				0.0348902	5.74537
	0.101868	0.0850654			0.101868	0.0848876			0.101868	0.0720707			0.101868	0.0518206			0.101868	0.0419541			0.101868	0.0303068					0.106253	0.0270861			0.106253	0.0272633			0.106253	0.0428028			0.106253	0.042915			0.106253	0.0451982				0.0351368	5.88541
	0.102583	0.0855303			0.102583	0.0794119			0.102583	0.0698011			0.102583	0.046052			0.102583	0.041165			0.102583	0.029932					0.106999	0.0315686			0.106999	0.0255992			0.106999	0.0421242			0.106999	0.0423863			0.106999	0.0441472				0.0353833	5.96315
	0.103298	0.0909862			0.103298	0.0766356			0.103298	0.0742251			0.103298	0.041372			0.103298	0.0503271			0.103298	0.0241173					0.107745	0.0308295			0.107745	0.0259753			0.107745	0.0416046			0.107745	0.0417458			0.107745	0.0430445				0.0356299	6.08512
	0.104012	0.0891971			0.104012	0.0820111			0.104012	0.0684407			0.104012	0.0506829			0.104012	0.0392622			0.104012	0.0312234					0.10849	0.0294777			0.10849	0.0264497			0.10849	0.0448629			0.10849	0.0446435			0.10849	0.0432107				0.0358765	6.22461
	0.104727	0.0813803			0.104727	0.0849995			0.104727	0.0728427			0.104727	0.0476834			0.104727	0.0334132			0.104727	0.0265202					0.109236	0.031956			0.109236	0.0270144			0.109236	0.0420129			0.109236	0.0447932			0.109236	0.043436				0.0361231	6.25235
	0.105442	0.0970577			0.105442	0.0856716			0.105442	0.0783504			0.105442	0.0357274			0.105442	0.049793			0.105442	0.0340155					0.109981	0.0305159			0.109981	0.0248607			0.109981	0.0412704			0.109981	0.0419438			0.109981	0.0402185				0.0363696	6.10756
	0.106157	0.0962412			0.106157	0.0794611			0.106157	0.0695183			0.106157	0.0408006			0.106157	0.0425657			0.106157	0.0296687					0.110727	0.0324905			0.110727	0.025577			0.110727	0.0402447			0.110727	0.0432888			0.110727	0.0425232				0.0366162	5.97404
	0.106871	0.0976106			0.106871	0.0813989			0.106871	0.0762822			0.106871	0.0403758			0.106871	0.0326806			0.106871	0.0238487					0.111473	0.0296113			0.111473	0.0241512			0.111473	0.041528			0.111473	0.042037			0.111473	0.0412234				0.0368628	6.07006
	0.107586	0.0966331			0.107586	0.0826028			0.107586	0.072031			0.107586	0.047653			0.107586	0.0521705			0.107586	0.0272119					0.112218	0.0305927			0.112218	0.0245669			0.112218	0.0405752			0.112218	0.0409329			0.112218	0.0417673				0.0371093	6.13784
	0.108301	0.0905834			0.108301	0.0759283			0.108301	0.0662445			0.108301	0.0413065			0.108301	0.0468846			0.108301	0.0194707					0.112964	0.0304015			0.112964	0.0273158			0.112964	0.0424685			0.112964	0.0417372			0.112964	0.042543				0.0373559	6.19977
	0.109016	0.0940401			0.109016	0.0871468			0.109016	0.0715065			0.109016	0.0488979			0.109016	0.0348387			0.109016	0.0269924					0.11371	0.0292994			0.11371	0.0248859			0.11371	0.040861			0.11371	0.0409229			0.11371	0.0421908				0.0376025	6.31236
	0.10973	0.096499			0.10973	0.0733465			0.10973	0.0664885			0.10973	0.0425098			0.10973	0.0408497			0.10973	0.0240991					0.114455	0.0290946			0.114455	0.0250272			0.114455	0.0426265			0.114455	0.0414636			0.114455	0.0410385				0.037849	6.2177
	0.110445	0.105184			0.110445	0.0813167			0.110445	0.0749429			0.110445	0.043015			0.110445	0.0317889			0.110445	0.0307148					0.115201	0.0295104			0.115201	0.0249793			0.115201	0.039449			0.115201	0.0421772			0.115201	0.0397687				0.0380956	6.08908
	0.11116	0.0974889			0.11116	0.0781296			0.11116	0.0626757			0.11116	0.0448449			0.11116	0.0322862			0.11116	0.0227804					0.115947	0.0293696			0.115947	0.0247653			0.115947	0.0395905			0.115947	0.0407229			0.115947	0.042721				0.0383422	6.21854
	0.111875	0.0930027			0.111875	0.0813181			0.111875	0.0577777			0.111875	0.0427093			0.111875	0.0338112			0.111875	0.0265094					0.116692	0.0299697			0.116692	0.0254846			0.116692	0.0405302			0.116692	0.040061			0.116692	0.0408882				0.0385887	6.46661
	0.112589	0.107856			0.112589	0.0749055			0.112589	0.0626336			0.112589	0.0399653			0.112589	0.03921			0.112589	0.0337423					0.117438	0.030114			0.117438	0.0243608			0.117438	0.0383076			0.117438	0.0422891			0.117438	0.0405202				0.0388353	6.48362
	0.113304	0.0955034			0.113304	0.0819182			0.113304	0.0747979			0.113304	0.0472401			0.113304	0.0356242			0.113304	0.0257903					0.118183	0.0298993			0.118183	0.0245643			0.118183	0.0399081			0.118183	0.0415323			0.118183	0.0402562				0.0390819	6.43621
	0.114019	0.104834			0.114019	0.0781726			0.114019	0.0591408			0.114019	0.0378642			0.114019	0.036812			0.114019	0.0267279					0.118929	0.0284736			0.118929	0.0249504			0.118929	0.0383303			0.118929	0.0396239			0.118929	0.0404659				0.0393284	6.52634
	0.114734	0.108627			0.114734	0.0815639			0.114734	0.070591			0.114734	0.0431522			0.114734	0.0344156			0.114734	0.0255773					0.119675	0.0325428			0.119675	0.0266195			0.119675	0.0397531			0.119675	0.0398775			0.119675	0.0393991				0.039575	6.50444
	0.115448	0.0989884			0.115448	0.0778716			0.115448	0.0639151			0.115448	0.0453006			0.115448	0.0400225			0.115448	0.0264518					0.12042	0.0287355			0.12042	0.0250781			0.12042	0.0396235			0.12042	0.0415044			0.12042	0.0408187				0.0398216	6.26992
	0.116163	0.10798			0.116163	0.0843233			0.116163	0.0612051			0.116163	0.0409484			0.116163	0.0466353			0.116163	0.0289734					0.121166	0.0281934			0.121166	0.0249871			0.121166	0.0389224			0.121166	0.0407932			0.121166	0.0392022				0.0400681	6.24271
	0.116878	0.096986			0.116878	0.0751318			0.116878	0.0686038			0.116878	0.0461854			0.116878	0.0380233			0.116878	0.031176					0.121912	0.0289008			0.121912	0.0249751			0.121912	0.0391084			0.121912	0.0400549			0.121912	0.0395041				0.0403147	6.43385
	0.117593	0.10587			0.117593	0.0831894			0.117593	0.0647605			0.117593	0.037315			0.117593	0.0396601			0.117593	0.025521					0.122657	0.0289046			0.122657	0.0230085			0.122657	0.0400628			0.122657	0.0388139			0.122657	0.0391229				0.0405612	6.47408
	0.118307	0.110024			0.118307	0.0798222			0.118307	0.0602031			0.118307	0.0455882			0.118307	0.0317178			0.118307	0.0231367					0.123403	0.0285076			0.123403	0.0249776			0.123403	0.0408156			0.123403	0.0389015			0.123403	0.0393822				0.0408078	6.55895
	0.119022	0.0995252			0.119022	0.0801838			0.119022	0.0596907			0.119022	0.0412466			0.119022	0.0418614			0.119022	0.019331					0.124149	0.0278056			0.124149	0.0236014			0.124149	0.0395203			0.124149	0.0403397			0.124149	0.0399695				0.0410544	6.76766
	0.119737	0.0956381			0.119737	0.0743787			0.119737	0.0588642			0.119737	0.0411461			0.119737	0.0402407			0.119737	0.025805					0.124894	0.0270981			0.124894	0.0236145			0.124894	0.0381859			0.124894	0.0396886			0.124894	0.0393363				0.0413009	6.94611
	0.120452	0.0950748			0.120452	0.076264			0.120452	0.0578044			0.120452	0.0358377			0.120452	0.0383535			0.120452	0.0252134					0.12564	0.0292057			0.12564	0.0242098			0.12564	0.0386186			0.12564	0.0403684			0.12564	0.0388895				0.0415475	6.96844
	0.121167	0.0976382			0.121167	0.0686034			0.121167	0.0492313			0.121167	0.036734			0.121167	0.035702			0.121167	0.0252583					0.126385	0.0263075			0.126385	0.0242222			0.126385	0.0371119			0.126385	0.0378033			0.126385	0.0373666				0.0417941	6.75237
	0.121881	0.0983644			0.121881	0.0823182			0.121881	0.0671826			0.121881	0.0346334			0.121881	0.0410651			0.121881	0.0236424					0.127131	0.0294776			0.127131	0.0242583			0.127131	0.0362324			0.127131	0.0366596			0.127131	0.0374842				0.0420406	6.64407
	0.122596	0.098586			0.122596	0.0660202			0.122596	0.0642421			0.122596	0.0448302			0.122596	0.0331554			0.122596	0.0236689					0.127877	0.028407			0.127877	0.0226923			0.127877	0.0368186			0.127877	0.0399678			0.127877	0.0381013				0.0422872	6.75835
	0.123311	0.0988932			0.123311	0.0736826			0.123311	0.0589876			0.123311	0.0420579			0.123311	0.0371349			0.123311	0.0236433					0.128622	0.0277576			0.128622	0.0234461			0.128622	0.0378047			0.128622	0.0383479			0.128622	0.0377051				0.0425338	6.80176
	0.124026	0.103197			0.124026	0.0750503			0.124026	0.0587646			0.124026	0.0376361			0.124026	0.038455			0.124026	0.0222875					0.129368	0.0273694			0.129368	0.0238697			0.129368	0.0410103			0.129368	0.039142			0.129368	0.0357976				0.0427803	6.89282
	0.12474	0.112917			0.12474	0.0701294			0.12474	0.0627325			0.12474	0.0393248			0.12474	0.0327217			0.12474	0.0287235					0.130114	0.028683			0.130114	0.0251785			0.130114	0.0383553			0.130114	0.0373904			0.130114	0.0368734				0.0430269	6.96216
	0.125455	0.0887817			0.125455	0.0737106			0.125455	0.0529826			0.125455	0.0378954			0.125455	0.0396092			0.125455	0.024153					0.130859	0.0289467			0.130859	0.0237483			0.130859	0.0379957			0.130859	0.0399664			0.130859	0.0367248				0.0432735	7.01695
	0.12617	0.101893			0.12617	0.0597072			0.12617	0.0457914			0.12617	0.0329114			0.12617	0.0397333			0.12617	0.0220088					0.131605	0.0300202			0.131605	0.0233192			0.131605	0.0380733			0.131605	0.0386746			0.131605	0.0388638				0.04352	7.05368
	0.126885	0.0951286			0.126885	0.0651588			0.126885	0.0594643			0.126885	0.0297873			0.126885	0.0391999			0.126885	0.0232259					0.132351	0.026495			0.132351	0.0229753			0.132351	0.0391248			0.132351	0.0392143			0.132351	0.0400297				0.0437666	6.98642
	0.1276	0.0995305			0.1276	0.0734305			0.1276	0.047802			0.1276	0.0368355			0.1276	0.0297062			0.1276	0.029122					0.133096	0.0275271			0.133096	0.0237649			0.133096	0.0373454			0.133096	0.0380369			0.133096	0.0376876				0.0440131	7.0355
	0.128314	0.106352			0.128314	0.0734398			0.128314	0.0546579			0.128314	0.0479287			0.128314	0.0382558			0.128314	0.0267097					0.133842	0.0272127			0.133842	0.0242605			0.133842	0.0345			0.133842	0.0376409			0.133842	0.0384786				0.0442597	7.14589
	0.129029	0.0932849			0.129029	0.0839169			0.129029	0.0599409			0.129029	0.0409687			0.129029	0.0407007			0.129029	0.0199903					0.134587	0.0286396			0.134587	0.024444			0.134587	0.0392188			0.134587	0.0386555			0.134587	0.0371155				0.0445063	7.20067
	0.129744	0.104217			0.129744	0.0717757			0.129744	0.0568697			0.129744	0.0336982			0.129744	0.033424			0.129744	0.0173272					0.135333	0.0270222			0.135333	0.0238918			0.135333	0.0378209			0.135333	0.0387601			0.135333	0.0366831				0.0447528	7.20188
	0.130459	0.0996642			0.130459	0.0755376			0.130459	0.0512871			0.130459	0.0349902			0.130459	0.0411219			0.130459	0.0247006					0.136079	0.0283196			0.136079	0.0234441			0.136079	0.0388784			0.136079	0.0385508			0.136079	0.0367705				0.0449994	7.14655
	0.131173	0.102378			0.131173	0.0755214			0.131173	0.0583743			0.131173	0.0375263			0.131173	0.0389796			0.131173	0.0270953					0.136824	0.0287758			0.136824	0.0242834			0.136824	0.0383906			0.136824	0.0383781			0.136824	0.0362952				0.045246	7.1922
	0.131888	0.0963168			0.131888	0.0698529			0.131888	0.0565938			0.131888	0.0367389			0.131888	0.0417511			0.131888	0.0215019					0.13757	0.0291039			0.13757	0.0232595			0.13757	0.0366235			0.13757	0.0377909			0.13757	0.0374877				0.0454925	7.43786
	0.132603	0.095356			0.132603	0.0739668			0.132603	0.0514037			0.132603	0.0272306			0.132603	0.0385063			0.132603	0.0228425					0.138316	0.0280061			0.138316	0.0232518			0.138316	0.0374584			0.138316	0.0391991			0.138316	0.0386057				0.0457391	7.60091
	0.133318	0.0953878			0.133318	0.0653498			0.133318	0.0533915			0.133318	0.0368496			0.133318	0.0330806			0.133318	0.0242434					0.139061	0.026398			0.139061	0.0219703			0.139061	0.0358537			0.139061	0.0388869			0.139061	0.0362047				0.0459856	7.5591
	0.134032	0.101445			0.134032	0.0749213			0.134032	0.0541885			0.134032	0.0309835			0.134032	0.0337453			0.134032	0.0314722					0.139807	0.0284971			0.139807	0.0244612			0.139807	0.0378378			0.139807	0.0403066			0.139807	0.0358445				0.0462322	7.5361
	0.134747	0.0984277			0.134747	0.0760717			0.134747	0.0509237			0.134747	0.0299548			0.134747	0.0395927			0.134747	0.0243482					0.140553	0.0282326			0.140553	0.023069			0.140553	0.0382561			0.140553	0.0368341			0.140553	0.0350886				0.0464788	7.52538
	0.135462	0.102083			0.135462	0.0633517			0.135462	0.058105			0.135462	0.0333943			0.135462	0.0273928			0.135462	0.0213119					0.141298	0.0281798			0.141298	0.0241883			0.141298	0.0388707			0.141298	0.0382072			0.141298	0.03446				0.0467253	7.53991
	0.136177	0.107552			0.136177	0.0702587			0.136177	0.0502984			0.136177	0.0368758			0.136177	0.0390161			0.136177	0.0237794					0.142044	0.0280456			0.142044	0.0232385			0.142044	0.0349109			0.142044	0.0380519			0.142044	0.0354286				0.0469719	7.64942
	0.136891	0.105665			0.136891	0.0718626			0.136891	0.0587205			0.136891	0.040682			0.136891	0.0432852			0.136891	0.0253226					0.142789	0.0266863			0.142789	0.0214851			0.142789	0.0373998			0.142789	0.0374853			0.142789	0.0364587				0.0472185	7.7762
	0.137606	0.106689			0.137606	0.0689104			0.137606	0.050127			0.137606	0.0396509			0.137606	0.0349919			0.137606	0.020625					0.143535	0.0273426			0.143535	0.0228496			0.143535	0.0375146			0.143535	0.0380851			0.143535	0.0359287				0.047465	7.86885
	0.138321	0.0948472			0.138321	0.0709458			0.138321	0.0612739			0.138321	0.0404926			0.138321	0.0460177			0.138321	0.0320922					0.144281	0.0283371			0.144281	0.0225436			0.144281	0.036357			0.144281	0.0372691			0.144281	0.0365367				0.0477116	7.95131
	0.139036	0.0977452			0.139036	0.0697777			0.139036	0.0594536			0.139036	0.0326772			0.139036	0.0384409			0.139036	0.0253271					0.145026	0.0263263			0.145026	0.0239601			0.145026	0.037437			0.145026	0.0385036			0.145026	0.0334298				0.0479581	8.03692
	0.13975	0.100321			0.13975	0.0632634			0.13975	0.0497249			0.13975	0.0386654			0.13975	0.0412836			0.13975	0.029028					0.145772	0.0265513			0.145772	0.0211929			0.145772	0.0353679			0.145772	0.0353069			0.145772	0.0364683				0.0482047	8.12116
	0.140465	0.083278			0.140465	0.0629334			0.140465	0.0435439			0.140465	0.0369069			0.140465	0.0341585			0.140465	0.0226173					0.146518	0.0265501			0.146518	0.0224598			0.146518	0.0365401			0.146518	0.0369058			0.146518	0.0358065				0.0484513	8.07098
	0.14118	0.0932153			0.14118	0.064138			0.14118	0.0532078			0.14118	0.0313331			0.14118	0.0377737			0.14118	0.0214194					0.147263	0.0269535			0.147263	0.0222602			0.147263	0.0342949			0.147263	0.0359911			0.147263	0.0341171				0.0486978	7.95552
	0.141895	0.103459			0.141895	0.0637593			0.141895	0.0574969			0.141895	0.0365945			0.141895	0.0375922			0.141895	0.0240137					0.148009	0.0267452			0.148009	0.0227404			0.148009	0.0357563			0.148009	0.0347661			0.148009	0.0336022				0.0489444	8.04554
	0.14261	0.096696			0.14261	0.0575279			0.14261	0.0490911			0.14261	0.036511			0.14261	0.0388212			0.14261	0.0258721					0.148755	0.025742			0.148755	0.0216545			0.148755	0.0342179			0.148755	0.0359797			0.148755	0.0353429				0.0491909	8.21845
	0.143324	0.0909145			0.143324	0.0602511			0.143324	0.0502879			0.143324	0.0299747			0.143324	0.0441963			0.143324	0.029135					0.1495	0.0255155			0.1495	0.0223792			0.1495	0.0354241			0.1495	0.0361696			0.1495	0.0347949				0.0494375	8.31445
	0.144039	0.0936626			0.144039	0.059711			0.144039	0.0606368			0.144039	0.0342905			0.144039	0.0367255			0.144039	0.0280898					0.150246	0.0249495			0.150246	0.021728			0.150246	0.0346665			0.150246	0.0342345			0.150246	0.0323749				0.0496841	8.32117
	0.144754	0.0974619			0.144754	0.0654118			0.144754	0.0512297			0.144754	0.0375544			0.144754	0.0300402			0.144754	0.0207803					0.150991	0.0258248			0.150991	0.0221898			0.150991	0.0360847			0.150991	0.0369826			0.150991	0.0315118				0.0499306	8.38651
	0.145469	0.101704			0.145469	0.0670404			0.145469	0.0481591			0.145469	0.0400189			0.145469	0.0387486			0.145469	0.0186945					0.151737	0.0256593			0.151737	0.0209242			0.151737	0.0354473			0.151737	0.0346903			0.151737	0.0328207				0.0501772	8.41974
	0.146183	0.0843422			0.146183	0.0731817			0.146183	0.0524952			0.146183	0.0412976			0.146183	0.0454047			0.146183	0.0277415					0.152483	0.0250653			0.152483	0.0222058			0.152483	0.0352926			0.152483	0.0339733			0.152483	0.0351911				0.0504237	8.26228
	0.146898	0.0866615			0.146898	0.057363			0.146898	0.0537224			0.146898	0.0412317			0.146898	0.0364648			0.146898	0.0232756					0.153228	0.0256003			0.153228	0.021566			0.153228	0.0331116			0.153228	0.0341755			0.153228	0.0349808				0.0506703	8.13026
	0.147613	0.0888424			0.147613	0.0636962			0.147613	0.0509241			0.147613	0.0400594			0.147613	0.0336547			0.147613	0.0228063					0.153974	0.0261443			0.153974	0.0205163			0.153974	0.0351085			0.153974	0.0333394			0.153974	0.0327698				0.0509169	8.15369
	0.148328	0.0923955			0.148328	0.0568806			0.148328	0.0539686			0.148328	0.0403814			0.148328	0.0383993			0.148328	0.0299032					0.15472	0.0248243			0.15472	0.021196			0.15472	0.0333934			0.15472	0.0356991			0.15472	0.0338569				0.0511634	8.15121
	0.149042	0.0912737			0.149042	0.0644009			0.149042	0.0553138			0.149042	0.0399967			0.149042	0.0367991			0.149042	0.0307414					0.155465	0.024835			0.155465	0.0210744			0.155465	0.0332785			0.155465	0.0357332			0.155465	0.034327				0.05141	8.21676
	0.149757	0.0919855			0.149757	0.063888			0.149757	0.0427296			0.149757	0.0329389			0.149757	0.0363353			0.149757	0.018275					0.156211	0.024922			0.156211	0.0213668			0.156211	0.0342456			0.156211	0.0354502			0.156211	0.0342043				0.0516565	8.47121
	0.150472	0.0808358			0.150472	0.0501131			0.150472	0.0508285			0.150472	0.0292508			0.150472	0.0298442			0.150472	0.0208478					0.156957	0.0253961			0.156957	0.0219806			0.156957	0.0328289			0.156957	0.0334437			0.156957	0.0328656				0.0519031	8.59994
	0.151187	0.0973464			0.151187	0.0599093			0.151187	0.0531115			0.151187	0.0307705			0.151187	0.0357512			0.151187	0.0240207					0.157702	0.0254945			0.157702	0.0217669			0.157702	0.0337093			0.157702	0.0339892			0.157702	0.0320742				0.0521496	8.5654
	0.151901	0.0989517			0.151901	0.0679889			0.151901	0.0497786			0.151901	0.0435548			0.151901	0.0380499			0.151901	0.0265869					0.158448	0.0252131			0.158448	0.0218761			0.158448	0.0332618			0.158448	0.0333886			0.158448	0.0321064				0.0523962	8.62429
	0.152616	0.0887447			0.152616	0.0725449			0.152616	0.0540297			0.152616	0.0394482			0.152616	0.0410495			0.152616	0.031005					0.159193	0.0262489			0.159193	0.0211142			0.159193	0.0348231			0.159193	0.0350479			0.159193	0.0327527				0.0526428	8.7326
	0.153331	0.0828147			0.153331	0.0564834			0.153331	0.0443349			0.153331	0.0294176			0.153331	0.0386517			0.153331	0.026636					0.159939	0.0260899			0.159939	0.0210694			0.159939	0.032099			0.159939	0.0339611			0.159939	0.0335744				0.0528893	8.73331
	0.154046	0.0855623			0.154046	0.0610936			0.154046	0.0518349			0.154046	0.0354317			0.154046	0.0389464			0.154046	0.0251979					0.160685	0.0250448			0.160685	0.0226728			0.160685	0.0332775			0.160685	0.0328175			0.160685	0.0333809				0.0531359	8.69453
	0.15476	0.078357			0.15476	0.0607938			0.15476	0.052662			0.15476	0.0443539			0.15476	0.0403764			0.15476	0.019792					0.16143	0.0252781			0.16143	0.0222319			0.16143	0.0320978			0.16143	0.0326079			0.16143	0.0318281				0.0533824	8.72139
	0.155475	0.0840526			0.155475	0.0604617			0.155475	0.0512989			0.155475	0.03658			0.155475	0.0384957			0.155475	0.0238701					0.162176	0.0254201			0.162176	0.0215309			0.162176	0.0341319			0.162176	0.0331588			0.162176	0.0316205				0.053629	8.82458
	0.15619	0.0854982			0.15619	0.0707982			0.15619	0.0570132			0.15619	0.0455094			0.15619	0.0231629			0.15619	0.0262907					0.162922	0.0248352			0.162922	0.0210948			0.162922	0.0346648			0.162922	0.0338818			0.162922	0.0325225				0.0538755	8.95211
	0.156905	0.0775851			0.156905	0.0689155			0.156905	0.0480629			0.156905	0.0371507			0.156905	0.0451189			0.156905	0.0273205					0.163667	0.0251229			0.163667	0.0210554			0.163667	0.0318035			0.163667	0.0346513			0.163667	0.0320127				0.0541221	9.05536
	0.157619	0.0803539			0.157619	0.0591161			0.157619	0.050239			0.157619	0.0336845			0.157619	0.0381844			0.157619	0.0245772					0.164413	0.0249352			0.164413	0.0202312			0.164413	0.0329693			0.164413	0.0355738			0.164413	0.0314003				0.0543687	9.10076
	0.158334	0.0888537			0.158334	0.0506078			0.158334	0.0456839			0.158334	0.0299486			0.158334	0.0297686			0.158334	0.0302849					0.165159	0.0254027			0.165159	0.0212727			0.165159	0.0326129			0.165159	0.0352202			0.165159	0.0318953				0.0546152	9.16834
	0.159049	0.0854812			0.159049	0.0541472			0.159049	0.0461443			0.159049	0.0369955			0.159049	0.036968			0.159049	0.0231029					0.165904	0.024315			0.165904	0.0207953			0.165904	0.0338712			0.165904	0.0329515			0.165904	0.0317363				0.0548618	9.17682
	0.159764	0.0796248			0.159764	0.0590558			0.159764	0.044765			0.159764	0.0355652			0.159764	0.0416153			0.159764	0.0246746					0.16665	0.0243154			0.16665	0.0218612			0.16665	0.0335596			0.16665	0.0334104			0.16665	0.0319668				0.0551083	9.12036
	0.160479	0.0859272			0.160479	0.0533118			0.160479	0.0547938			0.160479	0.0279399			0.160479	0.0308697			0.160479	0.0301779					0.167395	0.0253934			0.167395	0.020117			0.167395	0.0330868			0.167395	0.0334956			0.167395	0.0313949				0.0553549	9.1487
	0.161193	0.0834025			0.161193	0.0578368			0.161193	0.0435955			0.161193	0.0410789			0.161193	0.0414126			0.161193	0.0287023					0.168141	0.0241277			0.168141	0.021678			0.168141	0.0318861			0.168141	0.0341441			0.168141	0.0302767				0.0556014	9.25294
	0.161908	0.0821287			0.161908	0.0566927			0.161908	0.0403062			0.161908	0.0244482			0.161908	0.029279			0.161908	0.0160817					0.168887	0.026348			0.168887	0.0211245			0.168887	0.0337919			0.168887	0.0336723			0.168887	0.0309094				0.055848	9.28042
	0.162623	0.0886774			0.162623	0.0549467			0.162623	0.0479262			0.162623	0.0366303			0.162623	0.029533			0.162623	0.0264339					0.169632	0.0241217			0.169632	0.021038			0.169632	0.0334136			0.169632	0.0333252			0.169632	0.031409				0.0560945	9.21887
	0.163338	0.0790019			0.163338	0.0544381			0.163338	0.0398964			0.163338	0.0342756			0.163338	0.0327942			0.163338	0.0216854					0.170378	0.0236327			0.170378	0.0212909			0.170378	0.0322161			0.170378	0.0333655			0.170378	0.0322207				0.0563411	9.15053
	0.164052	0.0806103			0.164052	0.0593187			0.164052	0.0542459			0.164052	0.0328682			0.164052	0.036363			0.164052	0.0272018					0.171124	0.0231137			0.171124	0.0204095			0.171124	0.0328236			0.171124	0.0335333			0.171124	0.0306336				0.0565877	9.1774
	0.164767	0.0782611			0.164767	0.0540712			0.164767	0.0447743			0.164767	0.0387487			0.164767	0.0360173			0.164767	0.0217359					0.171869	0.0241452			0.171869	0.019615			0.171869	0.032931			0.171869	0.032789			0.171869	0.0307793				0.0568342	9.27949
	0.165482	0.0791533			0.165482	0.0667296			0.165482	0.0468158			0.165482	0.0233489			0.165482	0.0360214			0.165482	0.0214472					0.172615	0.0221757			0.172615	0.0200161			0.172615	0.0328244			0.172615	0.0332386			0.172615	0.0305741				0.0570808	9.42889
	0.166197	0.0699851			0.166197	0.0586828			0.166197	0.0400237			0.166197	0.0323591			0.166197	0.0418399			0.166197	0.0270999					0.173361	0.0237276			0.173361	0.0203392			0.173361	0.0327427			0.173361	0.0309927			0.173361	0.0308084				0.0573273	9.5925
	0.166911	0.0733768			0.166911	0.0570613			0.166911	0.0480271			0.166911	0.032448			0.166911	0.0370867			0.166911	0.0266103					0.174106	0.0249407			0.174106	0.0207145			0.174106	0.0314489			0.174106	0.0325764			0.174106	0.0314811				0.0575739	9.64169
	0.167626	0.0760016			0.167626	0.0580973			0.167626	0.0475845			0.167626	0.0451517			0.167626	0.0274131			0.167626	0.0136461					0.174852	0.0256699			0.174852	0.0198844			0.174852	0.0330605			0.174852	0.0329663			0.174852	0.0306549				0.0578204	9.5315
	0.168341	0.0779796			0.168341	0.052023			0.168341	0.0444946			0.168341	0.0338021			0.168341	0.0329926			0.168341	0.0291789					0.175597	0.0239988			0.175597	0.0202222			0.175597	0.034562			0.175597	0.0333571			0.175597	0.0310603				0.058067	9.48158
	0.169056	0.0666687			0.169056	0.0521076			0.169056	0.0514363			0.169056	0.0341898			0.169056	0.0329996			0.169056	0.0301188					0.176343	0.024437			0.176343	0.0202346			0.176343	0.0323374			0.176343	0.0317936			0.176343	0.0298861				0.0583135	9.46809
	0.16977	0.0840468			0.16977	0.0516887			0.16977	0.0399177			0.16977	0.0315942			0.16977	0.0311348			0.16977	0.0251502					0.177089	0.0243527			0.177089	0.0196632			0.177089	0.0325284			0.177089	0.0311037			0.177089	0.0285295				0.0585601	9.55014
	0.170485	0.0720006			0.170485	0.0553081			0.170485	0.0497808			0.170485	0.0325451			0.170485	0.0309151			0.170485	0.0172546					0.177834	0.0242992			0.177834	0.0199651			0.177834	0.0315806			0.177834	0.0303333			0.177834	0.0297713				0.0588066	9.61911
	0.1712	0.0732667			0.1712	0.0507216			0.1712	0.0462386			0.1712	0.0385162			0.1712	0.0384198			0.1712	0.0201765					0.17858	0.0235071			0.17858	0.0206145			0.17858	0.0305805			0.17858	0.0310381			0.17858	0.0307099				0.0590532	9.53904
	0.171915	0.0766821			0.171915	0.0612007			0.171915	0.0419872			0.171915	0.0363463			0.171915	0.0386842			0.171915	0.0205752					0.179326	0.024512			0.179326	0.0214846			0.179326	0.0314454			0.179326	0.0321167			0.179326	0.0293386				0.0592997	9.51859
	0.17263	0.0767354			0.17263	0.0541817			0.17263	0.0413776			0.17263	0.0287482			0.17263	0.0258595			0.17263	0.0177378					0.180071	0.0234707			0.180071	0.0200768			0.180071	0.0318387			0.180071	0.0325915			0.180071	0.030637				0.0595463	9.58291
	0.173344	0.0675135			0.173344	0.0483282			0.173344	0.0412063			0.173344	0.0337836			0.173344	0.0349673			0.173344	0.0231178					0.180817	0.0246957			0.180817	0.0199992			0.180817	0.032075			0.180817	0.03107			0.180817	0.0297353				0.0597928	9.60869
	0.174059	0.0700099			0.174059	0.0487638			0.174059	0.050203			0.174059	0.038526			0.174059	0.0431214			0.174059	0.0254977					0.181563	0.0245786			0.181563	0.0200941			0.181563	0.0314596			0.181563	0.0323972			0.181563	0.0302345				0.0600394	9.68023
	0.174774	0.0737846			0.174774	0.0515367			0.174774	0.0520544			0.174774	0.0312685			0.174774	0.0327558			0.174774	0.0194001					0.182308	0.023702			0.182308	0.0201331			0.182308	0.0308753			0.182308	0.0313543			0.182308	0.0292887				0.0602859	9.85412
	0.175489	0.0817944			0.175489	0.0460026			0.175489	0.0452473			0.175489	0.039026			0.175489	0.0298882			0.175489	0.0239759					0.183054	0.0223586			0.183054	0.0193581			0.183054	0.0324656			0.183054	0.0326166			0.183054	0.0294119				0.0605325	9.93783
	0.176203	0.0669542			0.176203	0.0456463			0.176203	0.0491316			0.176203	0.0269833			0.176203	0.0379562			0.176203	0.0177764					0.183799	0.0243187			0.183799	0.0201978			0.183799	0.0306034			0.183799	0.0306227			0.183799	0.0287829				0.060779	9.9635
	0.176918	0.0740107			0.176918	0.0427474			0.176918	0.0391359			0.176918	0.0312332			0.176918	0.0417406			0.176918	0.0187373					0.184545	0.0250427			0.184545	0.0209749			0.184545	0.0304452			0.184545	0.0313505			0.184545	0.0298173				0.0610256	9.96254
	0.177633	0.0764558			0.177633	0.0519642			0.177633	0.0346276			0.177633	0.0254144			0.177633	0.0318603			0.177633	0.0249743					0.185291	0.024366			0.185291	0.0199594			0.185291	0.0305664			0.185291	0.0332311			0.185291	0.0296966				0.0612721	9.86036
	0.178348	0.0599317			0.178348	0.0504481			0.178348	0.0410901			0.178348	0.029006			0.178348	0.0254857			0.178348	0.0193722					0.186036	0.02371			0.186036	0.0213663			0.186036	0.0322064			0.186036	0.0325289			0.186036	0.0290116				0.0615187	9.69755
	0.179062	0.0758814			0.179062	0.0537799			0.179062	0.0510086			0.179062	0.0341415			0.179062	0.0309695			0.179062	0.0264137					0.186782	0.0234164			0.186782	0.0201338			0.186782	0.0305735			0.186782	0.0290776			0.186782	0.0297513				0.0617652	9.63741
	0.179777	0.0706082			0.179777	0.0519012			0.179777	0.0388498			0.179777	0.0314725			0.179777	0.0228758			0.179777	0.0217497					0.187528	0.0233881			0.187528	0.0206366			0.187528	0.0309498			0.187528	0.0309156			0.187528	0.0293934				0.0620118	9.74179
	0.180492	0.0662891			0.180492	0.0489673			0.180492	0.0480005			0.180492	0.0273203			0.180492	0.0335004			0.180492	0.0213231					0.188273	0.0246945			0.188273	0.0202224			0.188273	0.0316587			0.188273	0.0296545			0.188273	0.0295923				0.0622583	9.93178
	0.181207	0.0585788			0.181207	0.0457503			0.181207	0.0426421			0.181207	0.0362557			0.181207	0.0301145			0.181207	0.0222519					0.189019	0.023027			0.189019	0.0200824			0.189019	0.029956			0.189019	0.0311806			0.189019	0.0287831				0.0625049	9.99008
	0.181922	0.0686694			0.181922	0.0499021			0.181922	0.0412799			0.181922	0.0281507			0.181922	0.0292261			0.181922	0.0224216					0.189765	0.0227715			0.189765	0.0203377			0.189765	0.0324353			0.189765	0.0301671			0.189765	0.0283438				0.0627514	9.9548
	0.182636	0.0572003			0.182636	0.0430124			0.182636	0.0475581			0.182636	0.0245533			0.182636	0.0285221			0.182636	0.024106					0.19051	0.0226348			0.19051	0.020393			0.19051	0.0310794			0.19051	0.0302757			0.19051	0.0281558				0.062998	9.99542
	0.183351	0.0758661			0.183351	0.0413098			0.183351	0.0398181			0.183351	0.0358984			0.183351	0.0206891			0.183351	0.0264626					0.191256	0.0230899			0.191256	0.0198999			0.191256	0.0301741			0.191256	0.0298554			0.191256	0.0297357				0.0632445	9.95703
	0.184066	0.0709633			0.184066	0.0489785			0.184066	0.0417068			0.184066	0.029818			0.184066	0.0284797			0.184066	0.0224201					0.192001	0.0234908			0.192001	0.0202124			0.192001	0.0315029			0.192001	0.0299605			0.192001	0.0285329				0.0634911	9.92138
	0.18478	0.0636675			0.18478	0.0444162			0.18478	0.0375936			0.18478	0.0283344			0.18478	0.0311153			0.18478	0.0143773					0.192747	0.0244098			0.192747	0.0201133			0.192747	0.0289407			0.192747	0.0305799			0.192747	0.027744				0.0637376	9.92075
	0.185495	0.0666044			0.185495	0.0559891			0.185495	0.0475602			0.185495	0.0359127			0.185495	0.0357994			0.185495	0.0190457					0.193493	0.0232563			0.193493	0.0199862			0.193493	0.0316232			0.193493	0.0301667			0.193493	0.0296793				0.0639842	9.7888
	0.18621	0.073348			0.18621	0.0422097			0.18621	0.0418799			0.18621	0.0322966			0.18621	0.0343735			0.18621	0.0155456					0.194238	0.0225715			0.194238	0.0198113			0.194238	0.0306781			0.194238	0.0306815			0.194238	0.0279635				0.0642307	9.71928
	0.186925	0.0596753			0.186925	0.0427911			0.186925	0.0477133			0.186925	0.0356692			0.186925	0.0307407			0.186925	0.0191708					0.194984	0.0232831			0.194984	0.0195935			0.194984	0.0306328			0.194984	0.0302008			0.194984	0.0290655				0.0644773	9.85842
	0.18764	0.0689703			0.18764	0.044786			0.18764	0.0397557			0.18764	0.0328212			0.18764	0.0329424			0.18764	0.0258048					0.19573	0.0232872			0.19573	0.0202322			0.19573	0.0294455			0.19573	0.0296354			0.19573	0.0283797				0.0647238	9.88532
	0.188354	0.054819			0.188354	0.0410346			0.188354	0.0347603			0.188354	0.0297954			0.188354	0.0314794			0.188354	0.0199257					0.196475	0.0238652			0.196475	0.0196594			0.196475	0.0304611			0.196475	0.0307961			0.196475	0.0283273				0.0649704	9.82703
	0.189069	0.0714019			0.189069	0.0465382			0.189069	0.0502762			0.189069	0.0394021			0.189069	0.0408123			0.189069	0.0198227					0.197221	0.0237177			0.197221	0.0196582			0.197221	0.0314556			0.197221	0.0301801			0.197221	0.0288965				0.0652169	9.91788
	0.189784	0.0490179			0.189784	0.041558			0.189784	0.025638			0.189784	0.0247285			0.189784	0.0312432			0.189784	0.021751					0.197967	0.0231685			0.197967	0.0201959			0.197967	0.0300788			0.197967	0.0291396			0.197967	0.0282465				0.0654635	9.94355
	0.190499	0.0625632			0.190499	0.0466375			0.190499	0.0444784			0.190499	0.0269991			0.190499	0.0310863			0.190499	0.0209899					0.198712	0.0239796			0.198712	0.0199648			0.198712	0.0313731			0.198712	0.0319345			0.198712	0.0274467				0.06571	9.92188
	0.191213	0.0776884			0.191213	0.0436469			0.191213	0.038728			0.191213	0.0297894			0.191213	0.0289222			0.191213	0.0229829					0.199458	0.0247925			0.199458	0.0203427			0.199458	0.0284733			0.199458	0.0295682			0.199458	0.0271837				0.0659566	9.99783
	0.191928	0.0557747			0.191928	0.0479339			0.191928	0.0482207			0.191928	0.0343337			0.191928	0.0230465			0.191928	0.0184541					0.200203	0.0232625			0.200203	0.0185761			0.200203	0.0328797			0.200203	0.0285096			0.200203	0.0290251				0.0662031	9.93487
	0.192643	0.0605436			0.192643	0.047862			0.192643	0.0412176			0.192643	0.0404269			0.192643	0.0414836			0.192643	0.0274802					0.200949	0.0241691			0.200949	0.0198247			0.200949	0.0305203			0.200949	0.0299513			0.200949	0.0287203				0.0664497	9.89109
	0.193358	0.0587621			0.193358	0.0481068			0.193358	0.0346738			0.193358	0.0311361			0.193358	0.0316307			0.193358	0.0298097					0.201695	0.022829			0.201695	0.0192118			0.201695	0.0301724			0.201695	0.0298522			0.201695	0.0288905				0.0666962	9.99296
	0.194072	0.062037			0.194072	0.041232			0.194072	0.0381075			0.194072	0.0208402			0.194072	0.0305104			0.194072	0.0260513					0.20244	0.0233217			0.20244	0.0194728			0.20244	0.0327039			0.20244	0.0310302			0.20244	0.0290086				0.0669427	9.98802
	0.194787	0.0621026			0.194787	0.0450964			0.194787	0.0374619			0.194787	0.0287548			0.194787	0.018482			0.194787	0.0218449					0.203186	0.0222184			0.203186	0.0195412			0.203186	0.0296609			0.203186	0.0289539			0.203186	0.0285136				0.0671893	9.89611
	0.195502	0.0542567			0.195502	0.0481287			0.195502	0.0366224			0.195502	0.0319517			0.195502	0.0294141			0.195502	0.0181745					0.203932	0.0235718			0.203932	0.0186457			0.203932	0.0316805			0.203932	0.0294694			0.203932	0.028057				0.0674358	9.96688
	0.196217	0.0623467			0.196217	0.0463901			0.196217	0.0317776			0.196217	0.0226928			0.196217	0.0236148			0.196217	0.0208653					0.204677	0.0230237			0.204677	0.0202233			0.204677	0.0296703			0.204677	0.0287308			0.204677	0.0281666				0.0676824	10.1286
	0.196932	0.0602857			0.196932	0.0470459			0.196932	0.0366199			0.196932	0.0328127			0.196932	0.0380376			0.196932	0.018813					0.205423	0.0222554			0.205423	0.0192357			0.205423	0.0303728			0.205423	0.0293715			0.205423	0.0270025				0.0679289	10.0789
	0.197646	0.0603788			0.197646	0.0432789			0.197646	0.0397306			0.197646	0.029128			0.197646	0.0283101			0.197646	0.00583383					0.206169	0.0233109			0.206169	0.0198646			0.206169	0.0297692			0.206169	0.0280986			0.206169	0.0282783				0.0681755	9.93563
	0.198361	0.0483241			0.198361	0.0428161			0.198361	0.0372916			0.198361	0.0283306			0.198361	0.0287931			0.198361	0.0169676					0.206914	0.0231301			0.206914	0.0189735			0.206914	0.0293039			0.206914	0.0298478			0.206914	0.0264127				0.068422	9.92949
	0.199076	0.05511			0.199076	0.0343385			0.199076	0.038691			0.199076	0.0254148			0.199076	0.0292154			0.199076	0.0188264					0.20766	0.0234243			0.20766	0.0192055			0.20766	0.0279243			0.20766	0.0295323			0.20766	0.0266889				0.0686686	9.90182
	0.199791	0.0597481			0.199791	0.0407402			0.199791	0.035595			0.199791	0.0231139			0.199791	0.0240382			0.199791	0.0204945					0.208405	0.0231578			0.208405	0.0198297			0.208405	0.0287976			0.208405	0.0285467			0.208405	0.0277497				0.0689151	9.87101
	0.200505	0.0626564			0.200505	0.0432054			0.200505	0.0376335			0.200505	0.0303908			0.200505	0.0246829			0.200505	0.0154476					0.209151	0.0232798			0.209151	0.0192465			0.209151	0.0288166			0.209151	0.0287617			0.209151	0.0279066				0.0691616	9.89032
	0.20122	0.0593689			0.20122	0.0493002			0.20122	0.0268266			0.20122	0.0256008			0.20122	0.0267088			0.20122	0.0109102					0.209897	0.0227232			0.209897	0.0194086			0.209897	0.0310676			0.209897	0.0287047			0.209897	0.0278556				0.0694082	9.88151
	0.201935	0.0586967			0.201935	0.0426115			0.201935	0.0377617			0.201935	0.034469			0.201935	0.0306394			0.201935	0.0194099					0.210642	0.0238389			0.210642	0.0194081			0.210642	0.0298029			0.210642	0.0291312			0.210642	0.0272058				0.0696547	9.89715
	0.20265	0.0468935			0.20265	0.039848			0.20265	0.0461634			0.20265	0.0316556			0.20265	0.0247051			0.20265	0.0190532					0.211388	0.0224138			0.211388	0.0197641			0.211388	0.0304543			0.211388	0.0286501			0.211388	0.0267838				0.0699013	9.94673
	0.203364	0.0549987			0.203364	0.0408051			0.203364	0.0388485			0.203364	0.0318103			0.203364	0.0240805			0.203364	0.020982					0.212134	0.0229526			0.212134	0.0191658			0.212134	0.0284992			0.212134	0.0288993			0.212134	0.026323				0.0701478	9.9536
	0.204079	0.0553709			0.204079	0.043587			0.204079	0.0369917			0.204079	0.0226825			0.204079	0.0227738			0.204079	0.0182838					0.212879	0.0233365			0.212879	0.0193091			0.212879	0.0298521			0.212879	0.0285073			0.212879	0.0271598				0.0703944	9.88069
	0.204794	0.0566566			0.204794	0.0469267			0.204794	0.0293205			0.204794	0.0274195			0.204794	0.0372125			0.204794	0.0212999					0.213625	0.0227111			0.213625	0.0189438			0.213625	0.0283149			0.213625	0.0280936			0.213625	0.0275537				0.0706409	9.78331
	0.205509	0.0602534			0.205509	0.0461764			0.205509	0.0371523			0.205509	0.0236413			0.205509	0.0212733			0.205509	0.0183948					0.214371	0.0224206			0.214371	0.0195364			0.214371	0.0290214			0.214371	0.029433			0.214371	0.0264022				0.0708874	9.79998
	0.206223	0.0511967			0.206223	0.0390737			0.206223	0.043305			0.206223	0.0285462			0.206223	0.0229478			0.206223	0.0180526					0.215116	0.022591			0.215116	0.0186253			0.215116	0.0292815			0.215116	0.0286107			0.215116	0.0264896				0.071134	9.86728
	0.206938	0.0498207			0.206938	0.0370081			0.206938	0.0382683			0.206938	0.0268185			0.206938	0.0233061			0.206938	0.0132403					0.215862	0.0225916			0.215862	0.0202461			0.215862	0.0289884			0.215862	0.0275273			0.215862	0.0275122				0.0713805	9.80175
	0.207653	0.0585071			0.207653	0.0407609			0.207653	0.0374782			0.207653	0.0248538			0.207653	0.0183367			0.207653	0.0158549					0.216607	0.021879			0.216607	0.0195183			0.216607	0.0293691			0.216607	0.0269919			0.216607	0.0271858				0.0716271	9.6665
	0.208368	0.043278			0.208368	0.0457052			0.208368	0.0380818			0.208368	0.0278088			0.208368	0.018981			0.208368	0.0241713					0.217353	0.0224754			0.217353	0.0187781			0.217353	0.028376			0.217353	0.0301223			0.217353	0.0250087				0.0718736	9.56644
	0.209083	0.0512676			0.209083	0.038262			0.209083	0.0391613			0.209083	0.0271352			0.209083	0.0281105			0.209083	0.0220093					0.218099	0.0223963			0.218099	0.018223			0.218099	0.0295957			0.218099	0.0284556			0.218099	0.0265752				0.0721201	9.52599
	0.209797	0.054328			0.209797	0.051601			0.209797	0.0403887			0.209797	0.0297693			0.209797	0.0248417			0.209797	0.017964					0.218844	0.0234942			0.218844	0.0191614			0.218844	0.0304516			0.218844	0.0297274			0.218844	0.0281958				0.0723667	9.61187
	0.210512	0.0565782			0.210512	0.0368763			0.210512	0.0346379			0.210512	0.0335237			0.210512	0.0296235			0.210512	0.0119186					0.21959	0.0226067			0.21959	0.0187598			0.21959	0.0278805			0.21959	0.0281103			0.21959	0.0275455				0.0726132	9.72922
	0.211227	0.0446964			0.211227	0.0437885			0.211227	0.0336613			0.211227	0.0273832			0.211227	0.0283285			0.211227	0.00993824					0.220336	0.0222846			0.220336	0.0183759			0.220336	0.0282778			0.220336	0.029035			0.220336	0.0259301				0.0728598	9.72285
	0.211942	0.0392211			0.211942	0.0350387			0.211942	0.0314771			0.211942	0.0167694			0.211942	0.0226872			0.211942	0.0166921					0.221081	0.0229699			0.221081	0.0196632			0.221081	0.0285029			0.221081	0.0286403			0.221081	0.0280329				0.0731063	9.72422
	0.212656	0.0464644			0.212656	0.0465224			0.212656	0.030927			0.212656	0.0235049			0.212656	0.0246588			0.212656	0.0153457					0.221827	0.0220567			0.221827	0.0193407			0.221827	0.0296047			0.221827	0.0271124			0.221827	0.026666				0.0733528	9.68895
	0.213371	0.0554032			0.213371	0.0421423			0.213371	0.0333923			0.213371	0.0266475			0.213371	0.0229641			0.213371	0.0205849					0.222573	0.0227482			0.222573	0.0192737			0.222573	0.0294961			0.222573	0.0282219			0.222573	0.0269603				0.0735994	9.63737
	0.214086	0.047791			0.214086	0.0406958			0.214086	0.0360096			0.214086	0.0382511			0.214086	0.0240458			0.214086	0.0148931					0.223318	0.0224648			0.223318	0.01897			0.223318	0.0297647			0.223318	0.0284776			0.223318	0.0260424				0.0738459	9.71207
	0.214801	0.0431823			0.214801	0.0346054			0.214801	0.0206984			0.214801	0.0164968			0.214801	0.0237308			0.214801	0.0187972					0.224064	0.0225605			0.224064	0.0198527			0.224064	0.0300801			0.224064	0.0274515			0.224064	0.0262463				0.0740925	9.73938
	0.215515	0.0506175			0.215515	0.039734			0.215515	0.0374152			0.215515	0.0269797			0.215515	0.0259163			0.215515	0.0135134					0.224809	0.0221873			0.224809	0.0190637			0.224809	0.0294939			0.224809	0.030008			0.224809	0.0261367				0.074339	9.68417
	0.21623	0.041816			0.21623	0.0274854			0.21623	0.0239159			0.21623	0.011978			0.21623	0.0306055			0.21623	0.01771					0.225555	0.0226729			0.225555	0.0199547			0.225555	0.0296008			0.225555	0.0281441			0.225555	0.0259216				0.0745855	9.54128
	0.216945	0.0323424			0.216945	0.0399218			0.216945	0.0349773			0.216945	0.0204338			0.216945	0.0191646			0.216945	0.0126294					0.226301	0.0218433			0.226301	0.0185342			0.226301	0.029182			0.226301	0.0283539			0.226301	0.0252495				0.0748321	9.39198
	0.21766	0.0534922			0.21766	0.0416478			0.21766	0.0387981			0.21766	0.0185099			0.21766	0.0287664			0.21766	0.0129667					0.227046	0.0221593			0.227046	0.0188741			0.227046	0.0274357			0.227046	0.0274871			0.227046	0.0258288				0.0750786	9.38829
	0.218374	0.0506532			0.218374	0.0423376			0.218374	0.0328885			0.218374	0.0335883			0.218374	0.0266491			0.218374	0.00866119					0.227792	0.0218318			0.227792	0.0181399			0.227792	0.0286797			0.227792	0.0276547			0.227792	0.0260655				0.0753251	9.45091
	0.219089	0.0540577			0.219089	0.0376787			0.219089	0.0357503			0.219089	0.0259649			0.219089	0.0300829			0.219089	0.0231814					0.228538	0.0222822			0.228538	0.0172313			0.228538	0.0284047			0.228538	0.0270457			0.228538	0.025152				0.0755717	9.4952
	0.219804	0.0349644			0.219804	0.027689			0.219804	0.0226689			0.219804	0.0172745			0.219804	0.0179964			0.219804	0.00781374					0.229283	0.0225959			0.229283	0.0188206			0.229283	0.0288753			0.229283	0.0270249			0.229283	0.026273				0.0758182	9.43167
	0.220519	0.040337			0.220519	0.0327363			0.220519	0.0206236			0.220519	0.0216462			0.220519	0.0241682			0.220519	0.0173784					0.230029	0.0223195			0.230029	0.0183072			0.230029	0.0291649			0.230029	0.0283073			0.230029	0.0266409				0.0760648	9.3109
	0.221233	0.0443569			0.221233	0.0355645			0.221233	0.0349284			0.221233	0.0250386			0.221233	0.0130937			0.221233	0.010147					0.230775	0.022442			0.230775	0.0186691			0.230775	0.0270138			0.230775	0.0275427			0.230775	0.0252239				0.0763113	9.36569
	0.221948	0.0516922			0.221948	0.0377309			0.221948	0.0284224			0.221948	0.0197494			0.221948	0.0183573			0.221948	0.00855753					0.23152	0.0219641			0.23152	0.018692			0.23152	0.0279947			0.23152	0.0273752			0.23152	0.0254661				0.0765578	9.41586
	0.222663	0.0407561			0.222663	0.034609			0.222663	0.0328964			0.222663	0.0161423			0.222663	0.0238997			0.222663	0.0154632					0.232266	0.0224544			0.232266	0.0183994			0.232266	0.0279809			0.232266	0.0282034			0.232266	0.0258472				0.0768044	9.29677
	0.223378	0.0422832			0.223378	0.0360194			0.223378	0.0283348			0.223378	0.0322809			0.223378	0.0268201			0.223378	0.018973					0.233012	0.0217858			0.233012	0.0184833			0.233012	0.0284545			0.233012	0.0281628			0.233012	0.0239738				0.0770509	9.18489
	0.224093	0.0569825			0.224093	0.0322584			0.224093	0.025405			0.224093	0.0217322			0.224093	0.0224151			0.224093	0.0150195					0.233757	0.0214167			0.233757	0.0190908			0.233757	0.0295677			0.233757	0.0272614			0.233757	0.026711				0.0772974	9.18408
	0.224807	0.0537735			0.224807	0.0353431			0.224807	0.0413477			0.224807	0.0256386			0.224807	0.0276521			0.224807	0.0148006					0.234503	0.0208659			0.234503	0.0181162			0.234503	0.0285227			0.234503	0.0271867			0.234503	0.0261464				0.077544	9.26844
	0.225522	0.0445231			0.225522	0.0441358			0.225522	0.0249724			0.225522	0.0224112			0.225522	0.026946			0.225522	0.0220462					0.235248	0.0214944			0.235248	0.0183473			0.235248	0.0291002			0.235248	0.0273356			0.235248	0.0265552				0.0777905	9.29151
	0.226237	0.0612268			0.226237	0.0346253			0.226237	0.0353528			0.226237	0.0320647			0.226237	0.0313453			0.226237	0.0149884					0.235994	0.0219452			0.235994	0.0190697			0.235994	0.0286422			0.235994	0.026736			0.235994	0.0254725				0.078037	9.12838
	0.226952	0.059316			0.226952	0.0374697			0.226952	0.0304541			0.226952	0.0314743			0.226952	0.0236726			0.226952	0.0136437					0.23674	0.0230218			0.23674	0.0189155			0.23674	0.0284093			0.23674	0.0275199			0.23674	0.0255297				0.0782836	9.04596
	0.227666	0.0585698			0.227666	0.0481913			0.227666	0.0339173			0.227666	0.0333242			0.227666	0.029708			0.227666	0.019931					0.237485	0.0215163			0.237485	0.0176716			0.237485	0.0281573			0.237485	0.0277672			0.237485	0.0255014				0.0785301	9.13029
	0.228381	0.0397759			0.228381	0.0227446			0.228381	0.0228131			0.228381	0.0282229			0.228381	0.0337489			0.228381	0.0244308					0.238231	0.0217403			0.238231	0.0188321			0.238231	0.027746			0.238231	0.0271349			0.238231	0.0249537				0.0787766	9.14354
	0.229096	0.0508908			0.229096	0.0344491			0.229096	0.0314425			0.229096	0.0251012			0.229096	0.0362714			0.229096	0.0137987					0.238977	0.0224598			0.238977	0.0187203			0.238977	0.0294438			0.238977	0.0273307			0.238977	0.0266273				0.0790232	9.04846
	0.229811	0.0551897			0.229811	0.0369575			0.229811	0.0489969			0.229811	0.0289212			0.229811	0.0240933			0.229811	0.0193645					0.239722	0.0222116			0.239722	0.0185025			0.239722	0.0280194			0.239722	0.0274787			0.239722	0.0252372				0.0792697	8.96122
	0.230525	0.0528506			0.230525	0.0398987			0.230525	0.0414434			0.230525	0.0255158			0.230525	0.0380804			0.230525	0.0267086					0.240468	0.0211522			0.240468	0.0177151			0.240468	0.0284616			0.240468	0.027145			0.240468	0.024122				0.0795162	8.98893
	0.23124	0.0462879			0.23124	0.0383987			0.23124	0.047122			0.23124	0.0259719			0.23124	0.0175595			0.23124	0.0212515					0.241214	0.0220292			0.241214	0.0180968			0.241214	0.0278691			0.241214	0.0282105			0.241214	0.0246417				0.0797628	8.98765
	0.231955	0.0713371			0.231955	0.0464923			0.231955	0.0354399			0.231955	0.0279633			0.231955	0.0453725			0.231955	0.0240627					0.241959	0.0211458			0.241959	0.0169905			0.241959	0.0273478			0.241959	0.0275754			0.241959	0.0251753				0.0800093	8.85816
	0.23267	0.0638496			0.23267	0.0484345			0.23267	0.0405069			0.23267	0.0297797			0.23267	0.0427864			0.23267	0.0247696					0.242705	0.0220239			0.242705	0.0178915			0.242705	0.0288746			0.242705	0.0263492			0.242705	0.024846				0.0802558	8.84802
	0.233384	0.0581685			0.233384	0.0445264			0.233384	0.0405429			0.233384	0.0309464			0.233384	0.0379542			0.233384	0.026206					0.24345	0.0227448			0.24345	0.0180183			0.24345	0.0289738			0.24345	0.0258236			0.24345	0.0245747				0.0805024	8.91766
	0.234099	0.0624893			0.234099	0.0514634			0.234099	0.0524008			0.234099	0.0339199			0.234099	0.0413631			0.234099	0.0311478					0.244196	0.0217173			0.244196	0.0183435			0.244196	0.0288039			0.244196	0.0260465			0.244196	0.0243598				0.0807489	8.92644
	0.234814	0.0613839			0.234814	0.0561646			0.234814	0.0526594			0.234814	0.0439919			0.234814	0.0438625			0.234814	0.0348163					0.244942	0.0221736			0.244942	0.0177661			0.244942	0.0269691			0.244942	0.0266389			0.244942	0.0248462				0.0809954	8.8935
	0.235529	0.0794861			0.235529	0.0687821			0.235529	0.0441677			0.235529	0.0399049			0.235529	0.044909			0.235529	0.03622					0.245687	0.0221344			0.245687	0.0186593			0.245687	0.0272258			0.245687	0.0265301			0.245687	0.0251877				0.081242	8.96131
	0.236243	0.0564729			0.236243	0.0410555			0.236243	0.037154			0.236243	0.0260748			0.236243	0.0252127			0.236243	0.0239587					0.246433	0.0218738			0.246433	0.0181413			0.246433	0.026683			0.246433	0.0262541			0.246433	0.0248984				0.0814885	9.01981
	0.236958	0.0580689			0.236958	0.0489581			0.236958	0.0332592			0.236958	0.021826			0.236958	0.0322471			0.236958	0.0345296					0.247179	0.0217455			0.247179	0.0179972			0.247179	0.0273473			0.247179	0.0252498			0.247179	0.0247029				0.081735	8.83685
	0.237673	0.0615896			0.237673	0.0487557			0.237673	0.0355638			0.237673	0.0356202			0.237673	0.0577335			0.237673	0.0333999					0.247924	0.0222165			0.247924	0.0178781			0.247924	0.0273957			0.247924	0.0266507			0.247924	0.0241293				0.0819815	8.64473
	0.238388	0.0621703			0.238388	0.0452615			0.238388	0.0356998			0.238388	0.0256655			0.238388	0.0240942			0.238388	0.0278331					0.24867	0.0212057			0.24867	0.0177386			0.24867	0.0283393			0.24867	0.0257312			0.24867	0.0256136				0.0822281	8.5616
	0.239102	0.055883			0.239102	0.0506828			0.239102	0.0236535			0.239102	0.0339903			0.239102	0.0280927			0.239102	0.0325859					0.249416	0.0207117			0.249416	0.018632			0.249416	0.0277719			0.249416	0.0256178			0.249416	0.0249475				0.0824746	8.53881
	0.239817	0.0602379			0.239817	0.0303349			0.239817	0.0372508			0.239817	0.0473506			0.239817	0.00321198			0.239817	0.00944744					0.250161	0.0204939			0.250161	0.0163521			0.250161	0.0287009			0.250161	0.0256956			0.250161	0.0237573				0.0827211	8.58894
	0.240532	0.0454965			0.240532	0.0463289			0.240532	0.0337785			0.240532	0.0236572			0.240532	0.0708747			0.240532	0.0436079					0.250907	0.022481			0.250907	0.0178534			0.250907	0.0280887			0.250907	0.0257759			0.250907	0.0247813				0.0829677	8.57804
	0.241247	0.0277205			0.241247	0.0103309			0.241247	0.012848			0.241247	0.00988948			0.241247	0.0300137			0.241247	0.01758					0.251652	0.0207667			0.251652	0.017129			0.251652	0.0272983			0.251652	0.0253428			0.251652	0.0246931				0.0832142	8.54376
	0.241962	0.0266909			0.241962	0.0290086			0.241962	0.0690033			0.241962	0.0842021			0.241962	0.0310989			0.241962	0.011548					0.252398	0.0211809			0.252398	0.0173019			0.252398	0.0267195			0.252398	0.0261366			0.252398	0.0237445				0.0834607	8.62726
	0.242676	-0.0123406			0.242676	-0.00345297			0.242676	0.00391936			0.242676	0.0332978			0.242676	0.0480836			0.242676	-0.00961594					0.253144	0.0209635			0.253144	0.0170627			0.253144	0.0277457			0.253144	0.0257524			0.253144	0.0250039				0.0837072	8.63554
	0.243391	-0.142536			0.243391	-0.10767			0.243391	-0.110986			0.243391	-0.108062			0.243391	-0.140398			0.243391	-0.112952					0.253889	0.0210413			0.253889	0.0166066			0.253889	0.0272495			0.253889	0.0255062			0.253889	0.0230365				0.0839538	8.54978
	0.244106	-0.142536			0.244106	-0.10767			0.244106	-0.110986			0.244106	-0.108062			0.244106	-0.140398			0.244106	-0.112952					0.254635	0.0220614			0.254635	0.0184332			0.254635	0.027175			0.254635	0.0262699			0.254635	0.024224				0.0842003	8.50344
	0.244821	-0.142536			0.244821	-0.10767			0.244821	-0.110986			0.244821	-0.108062			0.244821	-0.140398			0.244821	-0.112952					0.255381	0.0207159			0.255381	0.0179117			0.255381	0.0271932			0.255381	0.0266643			0.255381	0.0239482				0.0844468	8.44003
	0.245535	-0.142536			0.245535	-0.10767			0.245535	-0.110986			0.245535	-0.108062			0.245535	-0.140398			0.245535	-0.112952					0.256126	0.0204047			0.256126	0.0178233			0.256126	0.0282915			0.256126	0.026456			0.256126	0.0236092				0.0846934	8.50961
	0.24625	-0.142536			0.24625	-0.10767			0.24625	-0.110986			0.24625	-0.108062			0.24625	-0.140398			0.24625	-0.112952					0.256872	0.0210255			0.256872	0.017753			0.256872	0.0279038			0.256872	0.025505			0.256872	0.0240825				0.0849399	8.60473
	0.246965	-0.142536			0.246965	-0.10767			0.246965	-0.110986			0.246965	-0.108062			0.246965	-0.140398			0.246965	-0.112952					0.257618	0.0210573			0.257618	0.017709			0.257618	0.0271632			0.257618	0.0262068			0.257618	0.0237751				0.0851864	8.52765
	0.24768	-0.142536			0.24768	-0.10767			0.24768	-0.110986			0.24768	-0.108062			0.24768	-0.140398			0.24768	-0.112952					0.258363	0.0204207			0.258363	0.017509			0.258363	0.0264508			0.258363	0.0255913			0.258363	0.0243047				0.0854329	8.42037
	0.248394	-0.142536			0.248394	-0.10767			0.248394	-0.110986			0.248394	-0.108062			0.248394	-0.140398			0.248394	-0.112952					0.259109	0.0199571			0.259109	0.0174629			0.259109	0.0278367			0.259109	0.0258182			0.259109	0.0241618				0.0856795	8.29893
	0.249109	-0.142536			0.249109	-0.10767			0.249109	-0.110986			0.249109	-0.108062			0.249109	-0.140398			0.249109	-0.112952					0.259854	0.0204481			0.259854	0.0177726			0.259854	0.0261241			0.259854	0.0250835			0.259854	0.0234543				0.085926	8.19089
	0.249824	-0.142536			0.249824	-0.10767			0.249824	-0.110986			0.249824	-0.108062			0.249824	-0.140398			0.249824	-0.112952					0.2606	0.0213521			0.2606	0.0173078			0.2606	0.0286596			0.2606	0.0260919			0.2606	0.0239264				0.0861725	8.24663
	0.250539	-0.142536			0.250539	-0.10767			0.250539	-0.110986			0.250539	-0.108062			0.250539	-0.140398			0.250539	-0.112952					0.261346	0.0220053			0.261346	0.0174189			0.261346	0.0275719			0.261346	0.0253799			0.261346	0.0241705				0.086419	8.34798
	0.251254	-0.142536			0.251254	-0.10767			0.251254	-0.110986			0.251254	-0.108062			0.251254	-0.140398			0.251254	-0.112952					0.262091	0.0212445			0.262091	0.0173969			0.262091	0.0266128			0.262091	0.0249116			0.262091	0.02501				0.0866656	8.31038
	0.251968	-0.142536			0.251968	-0.10767			0.251968	-0.110986			0.251968	-0.108062			0.251968	-0.140398			0.251968	-0.112952					0.262837	0.0199866			0.262837	0.0174569			0.262837	0.0271899			0.262837	0.0258192			0.262837	0.024366				0.0869121	8.27236
	0.252683	-0.142536			0.252683	-0.10767			0.252683	-0.110986			0.252683	-0.108062			0.252683	-0.140398			0.252683	-0.112952					0.263583	0.020186			0.263583	0.0176808			0.263583	0.0269591			0.263583	0.025323			0.263583	0.023008				0.0871586	8.33455
	0.253398	-0.142536			0.253398	-0.10767			0.253398	-0.110986			0.253398	-0.108062			0.253398	-0.140398			0.253398	-0.112952					0.264328	0.0207007			0.264328	0.0180707			0.264328	0.0266675			0.264328	0.0259981			0.264328	0.0242804				0.0874051	8.2576
	0.254113	-0.142536			0.254113	-0.10767			0.254113	-0.110986			0.254113	-0.108062			0.254113	-0.140398			0.254113	-0.112952					0.265074	0.0216801			0.265074	0.0176911			0.265074	0.0259269			0.265074	0.025158			0.265074	0.0239645				0.0876516	8.05953
	0.254827	-0.142536			0.254827	-0.10767			0.254827	-0.110986			0.254827	-0.108062			0.254827	-0.140398			0.254827	-0.112952					0.26582	0.0209832			0.26582	0.016945			0.26582	0.0257368			0.26582	0.0265022			0.26582	0.0244339				0.0878982	7.98302
	0.255542	-0.142536			0.255542	-0.10767			0.255542	-0.110986			0.255542	-0.108062			0.255542	-0.140398			0.255542	-0.112952					0.266565	0.021527			0.266565	0.0172108			0.266565	0.0267786			0.266565	0.0252842			0.266565	0.0231302				0.0881447	8.04057
	0.256257	-0.142536			0.256257	-0.10767			0.256257	-0.110986			0.256257	-0.108062			0.256257	-0.140398			0.256257	-0.112952					0.267311	0.0205777			0.267311	0.0171181			0.267311	0.0257476			0.267311	0.0253808			0.267311	0.0236738				0.0883912	8.12378
	0.256972	-0.142536			0.256972	-0.10767			0.256972	-0.110986			0.256972	-0.108062			0.256972	-0.140398			0.256972	-0.112952					0.268056	0.021769			0.268056	0.0174775			0.268056	0.0266653			0.268056	0.0255009			0.268056	0.0227628				0.0886377	8.16693
	0.257686	-0.142536			0.257686	-0.10767			0.257686	-0.110986			0.257686	-0.108062			0.257686	-0.140398			0.257686	-0.112952					0.268802	0.0215324			0.268802	0.0169624			0.268802	0.0253319			0.268802	0.0257192			0.268802	0.023649				0.0888843	8.17022
	0.258401	-0.142536			0.258401	-0.10767			0.258401	-0.110986			0.258401	-0.108062			0.258401	-0.140398			0.258401	-0.112952					0.269548	0.020977			0.269548	0.0174023			0.269548	0.0260063			0.269548	0.0259036			0.269548	0.0226679				0.0891308	8.1662
	0.259116	-0.142536			0.259116	-0.10767			0.259116	-0.110986			0.259116	-0.108062			0.259116	-0.140398			0.259116	-0.112952					0.270293	0.0217222			0.270293	0.0171641			0.270293	0.0272386			0.270293	0.0253558			0.270293	0.0232284				0.0893773	8.17903
	0.259831	-0.142536			0.259831	-0.10767			0.259831	-0.110986			0.259831	-0.108062			0.259831	-0.140398			0.259831	-0.112952					0.271039	0.0204871			0.271039	0.0173103			0.271039	0.0275055			0.271039	0.0244713			0.271039	0.0235837				0.0896238	8.0887
	0.260545	-0.142536			0.260545	-0.10767			0.260545	-0.110986			0.260545	-0.108062			0.260545	-0.140398			0.260545	-0.112952					0.271785	0.0205448			0.271785	0.0172107			0.271785	0.0259317			0.271785	0.0248037			0.271785	0.0234438				0.0898703	7.91948
	0.26126	-0.142536			0.26126	-0.10767			0.26126	-0.110986			0.26126	-0.108062			0.26126	-0.140398			0.26126	-0.112952					0.27253	0.0209621			0.27253	0.0168058			0.27253	0.0257151			0.27253	0.024582			0.27253	0.0230706				0.0901169	7.77619
	0.261975	-0.142536			0.261975	-0.10767			0.261975	-0.110986			0.261975	-0.108062			0.261975	-0.140398			0.261975	-0.112952					0.273276	0.0212614			0.273276	0.0175275			0.273276	0.0255811			0.273276	0.024148			0.273276	0.0223021				0.0903634	7.70028
	0.26269	-0.142536			0.26269	-0.10767			0.26269	-0.110986			0.26269	-0.108062			0.26269	-0.140398			0.26269	-0.112952					0.274022	0.0203166			0.274022	0.016941			0.274022	0.0250248			0.274022	0.0255443			0.274022	0.0236393				0.0906099	7.73655
	0.263404	-0.142536			0.263404	-0.10767			0.263404	-0.110986			0.263404	-0.108062			0.263404	-0.140398			0.263404	-0.112952					0.274767	0.0201377			0.274767	0.0171141			0.274767	0.0266642			0.274767	0.0235515			0.274767	0.0228521				0.0908564	7.84958
	0.264119	-0.142536			0.264119	-0.10767			0.264119	-0.110986			0.264119	-0.108062			0.264119	-0.140398			0.264119	-0.112952					0.275513	0.021202			0.275513	0.0178972			0.275513	0.0260928			0.275513	0.0244197			0.275513	0.0231261				0.0911029	7.95531
	0.264834	-0.142536			0.264834	-0.10767			0.264834	-0.110986			0.264834	-0.108062			0.264834	-0.140398			0.264834	-0.112952					0.276258	0.0209413			0.276258	0.0172922			0.276258	0.0258799			0.276258	0.0248475			0.276258	0.0231459				0.0913495	7.89865
	0.265549	-0.142536			0.265549	-0.10767			0.265549	-0.110986			0.265549	-0.108062			0.265549	-0.140398			0.265549	-0.112952					0.277004	0.0201322			0.277004	0.0168883			0.277004	0.0262175			0.277004	0.0251256			0.277004	0.0227971				0.091596	7.7159
	0.266263	-0.142536			0.266263	-0.10767			0.266263	-0.110986			0.266263	-0.108062			0.266263	-0.140398			0.266263	-0.112952					0.27775	0.0198428			0.27775	0.016447			0.27775	0.0253692			0.27775	0.0242999			0.27775	0.0224696				0.0918425	7.61748
	0.266978	-0.142536			0.266978	-0.10767			0.266978	-0.110986			0.266978	-0.108062			0.266978	-0.140398			0.266978	-0.112952					0.278495	0.0197955			0.278495	0.0166766			0.278495	0.026526			0.278495	0.0245881			0.278495	0.0226139				0.092089	7.7495
	0.267693	-0.142536			0.267693	-0.10767			0.267693	-0.110986			0.267693	-0.108062			0.267693	-0.140398			0.267693	-0.112952					0.279241	0.0217169			0.279241	0.0167712			0.279241	0.0266328			0.279241	0.0240812			0.279241	0.0228697				0.0923355	7.87498
	0.268408	-0.142536			0.268408	-0.10767			0.268408	-0.110986			0.268408	-0.108062			0.268408	-0.140398			0.268408	-0.112952					0.279987	0.021243			0.279987	0.0174621			0.279987	0.026216			0.279987	0.0234908			0.279987	0.0230254				0.092582	7.90087
	0.269123	-0.142536			0.269123	-0.10767			0.269123	-0.110986			0.269123	-0.108062			0.269123	-0.140398			0.269123	-0.112952					0.280732	0.0209964			0.280732	0.016383			0.280732	0.0255114			0.280732	0.0248215			0.280732	0.0228642				0.0928286	7.85795
	0.269837	-0.142536			0.269837	-0.10767			0.269837	-0.110986			0.269837	-0.108062			0.269837	-0.140398			0.269837	-0.112952					0.281478	0.0199834			0.281478	0.0170947			0.281478	0.0256234			0.281478	0.0242835			0.281478	0.022994				0.0930751	7.77702
	0.270552	-0.142536			0.270552	-0.10767			0.270552	-0.110986			0.270552	-0.108062			0.270552	-0.140398			0.270552	-0.112952					0.282224	0.0206779			0.282224	0.0169159			0.282224	0.0261027			0.282224	0.0257067			0.282224	0.0222444				0.0933216	7.75734
	0.271267	-0.142536			0.271267	-0.10767			0.271267	-0.110986			0.271267	-0.108062			0.271267	-0.140398			0.271267	-0.112952					0.282969	0.0203111			0.282969	0.0168756			0.282969	0.025707			0.282969	0.0251975			0.282969	0.0240411				0.0935681	7.69568
	0.271982	-0.142536			0.271982	-0.10767			0.271982	-0.110986			0.271982	-0.108062			0.271982	-0.140398			0.271982	-0.112952					0.283715	0.0215156			0.283715	0.0170314			0.283715	0.0256635			0.283715	0.0243598			0.283715	0.0235133				0.0938146	7.59095
	0.272696	-0.142536			0.272696	-0.10767			0.272696	-0.110986			0.272696	-0.108062			0.272696	-0.140398			0.272696	-0.112952					0.28446	0.020093			0.28446	0.0170313			0.28446	0.0266187			0.28446	0.0241173			0.28446	0.0239114				0.0940611	7.61678
	0.273411	-0.142536			0.273411	-0.10767			0.273411	-0.110986			0.273411	-0.108062			0.273411	-0.140398			0.273411	-0.112952					0.285206	0.0193981			0.285206	0.0166697			0.285206	0.025193			0.285206	0.0234558			0.285206	0.0232751				0.0943077	7.67993
	0.274126	-0.142536			0.274126	-0.10767			0.274126	-0.110986			0.274126	-0.108062			0.274126	-0.140398			0.274126	-0.112952					0.285952	0.0215685			0.285952	0.0161628			0.285952	0.0261474			0.285952	0.0233549			0.285952	0.0225311				0.0945542	7.65406
	0.274841	-0.142536			0.274841	-0.10767			0.274841	-0.110986			0.274841	-0.108062			0.274841	-0.140398			0.274841	-0.112952					0.286697	0.0210511			0.286697	0.0175132			0.286697	0.0256482			0.286697	0.0248412			0.286697	0.0234224				0.0948007	7.68724
	0.275556	-0.142536			0.275556	-0.10767			0.275556	-0.110986			0.275556	-0.108062			0.275556	-0.140398			0.275556	-0.112952					0.287443	0.0204074			0.287443	0.0174146			0.287443	0.0260728			0.287443	0.0231604			0.287443	0.0219355				0.0950472	7.70793
	0.27627	-0.142536			0.27627	-0.10767			0.27627	-0.110986			0.27627	-0.108062			0.27627	-0.140398			0.27627	-0.112952					0.288189	0.0203429			0.288189	0.016365			0.288189	0.0257805			0.288189	0.0245167			0.288189	0.0222853				0.0952937	7.60141
	0.276985	-0.142536			0.276985	-0.10767			0.276985	-0.110986			0.276985	-0.108062			0.276985	-0.140398			0.276985	-0.112952					0.288934	0.020363			0.288934	0.0172462			0.288934	0.0257949			0.288934	0.0251986			0.288934	0.0217712				0.0955402	7.54717
	0.2777	-0.142536			0.2777	-0.10767			0.2777	-0.110986			0.2777	-0.108062			0.2777	-0.140398			0.2777	-0.112952					0.28968	0.0196825			0.28968	0.0163941			0.28968	0.0263368			0.28968	0.0253009			0.28968	0.0228091				0.0957867	7.58539
	0.278415	-0.142536			0.278415	-0.10767			0.278415	-0.110986			0.278415	-0.108062			0.278415	-0.140398			0.278415	-0.112952					0.290426	0.0208593			0.290426	0.0168773			0.290426	0.0263452			0.290426	0.0249835			0.290426	0.0220564				0.0960332	7.61391
	0.279129	-0.142536			0.279129	-0.10767			0.279129	-0.110986			0.279129	-0.108062			0.279129	-0.140398			0.279129	-0.112952					0.291171	0.0208879			0.291171	0.0161844			0.291171	0.0258984			0.291171	0.0241898			0.291171	0.0221687				0.0962798	7.54442
	0.279844	-0.142536			0.279844	-0.10767			0.279844	-0.110986			0.279844	-0.108062			0.279844	-0.140398			0.279844	-0.112952					0.291917	0.0216162			0.291917	0.0166223			0.291917	0.0253751			0.291917	0.0234441			0.291917	0.0225969				0.0965263	7.44277
	0.280559	-0.142536			0.280559	-0.10767			0.280559	-0.110986			0.280559	-0.108062			0.280559	-0.140398			0.280559	-0.112952					0.292662	0.0212115			0.292662	0.0165413			0.292662	0.0249393			0.292662	0.0237489			0.292662	0.0220032				0.0967728	7.46339
	0.281274	-0.142536			0.281274	-0.10767			0.281274	-0.110986			0.281274	-0.108062			0.281274	-0.140398			0.281274	-0.112952					0.293408	0.0201223			0.293408	0.0173248			0.293408	0.0248076			0.293408	0.0247466			0.293408	0.0214834				0.0970193	7.5315
	0.281988	-0.142536			0.281988	-0.10767			0.281988	-0.110986			0.281988	-0.108062			0.281988	-0.140398			0.281988	-0.112952					0.294154	0.0206507			0.294154	0.0170062			0.294154	0.0254102			0.294154	0.0231507			0.294154	0.0209643				0.0972658	7.50835
	0.282703	-0.142536			0.282703	-0.10767			0.282703	-0.110986			0.282703	-0.108062			0.282703	-0.140398			0.282703	-0.112952					0.294899	0.0212334			0.294899	0.0177388			0.294899	0.0248675			0.294899	0.0237146			0.294899	0.0214108				0.0975123	7.42051
	0.283418	-0.142536			0.283418	-0.10767			0.283418	-0.110986			0.283418	-0.108062			0.283418	-0.140398			0.283418	-0.112952					0.295645	0.0208681			0.295645	0.0168954			0.295645	0.0252678			0.295645	0.0238863			0.295645	0.0220967				0.0977588	7.38909
	0.284133	-0.142536			0.284133	-0.10767			0.284133	-0.110986			0.284133	-0.108062			0.284133	-0.140398			0.284133	-0.112952					0.296391	0.0203634			0.296391	0.0170076			0.296391	0.0252844			0.296391	0.0242929			0.296391	0.0228048				0.0980053	7.32846
	0.284847	-0.142536			0.284847	-0.10767			0.284847	-0.110986			0.284847	-0.108062			0.284847	-0.140398			0.284847	-0.112952					0.297136	0.0202024			0.297136	0.0162559			0.297136	0.0260525			0.297136	0.0229887			0.297136	0.0218906				0.0982518	7.26942
																											0.297882	0.0189921			0.297882	0.0161493			0.297882	0.0245527			0.297882	0.0244199			0.297882	0.0218624				0.0984983	7.3695
																											0.298628	0.0203311			0.298628	0.0168999			0.298628	0.0253862			0.298628	0.0245895			0.298628	0.0216456				0.0987449	7.41351
																											0.299373	0.0216496			0.299373	0.0168135			0.299373	0.0254724			0.299373	0.0246743			0.299373	0.0220318				0.0989914	7.30604
																											0.300119	0.0203958			0.300119	0.0152947			0.300119	0.0264641			0.300119	0.0242807			0.300119	0.0218248				0.0992379	7.18992
																											0.300864	0.0213977			0.300864	0.0170679			0.300864	0.0260099			0.300864	0.0236078			0.300864	0.0223025				0.0994844	7.09601
																											0.30161	0.0210123			0.30161	0.0170183			0.30161	0.0253601			0.30161	0.0251024			0.30161	0.021317				0.0997309	7.11386
																											0.302356	0.0204263			0.302356	0.0162709			0.302356	0.0255594			0.302356	0.0231643			0.302356	0.0213999				0.0999774	7.26427
																											0.303101	0.0201789			0.303101	0.0172102			0.303101	0.0251654			0.303101	0.0236564			0.303101	0.0223151				0.100224	7.32907
																											0.303847	0.0207585			0.303847	0.0164145			0.303847	0.0250441			0.303847	0.0241509			0.303847	0.0220622				0.10047	7.26941
																											0.304593	0.0206536			0.304593	0.0162996			0.304593	0.0249498			0.304593	0.0234687			0.304593	0.0212155				0.100717	7.18549
																											0.305338	0.0204733			0.305338	0.0164226			0.305338	0.0244192			0.305338	0.0234786			0.305338	0.0213983				0.100963	7.18808
																											0.306084	0.0201958			0.306084	0.0163592			0.306084	0.0256513			0.306084	0.0236061			0.306084	0.021957				0.10121	7.2108
																											0.30683	0.0194717			0.30683	0.0160752			0.30683	0.0233429			0.30683	0.0229453			0.30683	0.0218337				0.101456	7.14214
																											0.307575	0.020277			0.307575	0.0162396			0.307575	0.0244047			0.307575	0.0236479			0.307575	0.0207772				0.101703	7.10901
																											0.308321	0.0212224			0.308321	0.017015			0.308321	0.0251597			0.308321	0.023293			0.308321	0.0215707				0.101949	7.09441
																											0.309066	0.0211856			0.309066	0.0169427			0.309066	0.0248427			0.309066	0.0238332			0.309066	0.0209781				0.102196	7.11606
																											0.309812	0.0194554			0.309812	0.0164086			0.309812	0.0249994			0.309812	0.0236251			0.309812	0.0209231				0.102442	7.17953
																											0.310558	0.020836			0.310558	0.0164214			0.310558	0.02633			0.310558	0.0237031			0.310558	0.022103				0.102689	7.08445
																											0.311303	0.0215401			0.311303	0.0167715			0.311303	0.0256234			0.311303	0.0235423			0.311303	0.0210243				0.102935	6.94016
																											0.312049	0.0210891			0.312049	0.0171169			0.312049	0.0260749			0.312049	0.023281			0.312049	0.0224861				0.103182	6.91162
																											0.312795	0.0207491			0.312795	0.0156454			0.312795	0.0246966			0.312795	0.0226717			0.312795	0.0209479				0.103428	6.94912
																											0.31354	0.0207461			0.31354	0.0170445			0.31354	0.0242995			0.31354	0.0232212			0.31354	0.0217577				0.103675	7.05782
																											0.314286	0.0192705			0.314286	0.0163443			0.314286	0.0247286			0.314286	0.023331			0.314286	0.0220798				0.103921	7.18646
																											0.315032	0.0210019			0.315032	0.0163334			0.315032	0.0247788			0.315032	0.0237691			0.315032	0.0208724				0.104168	7.11334
																											0.315777	0.0205979			0.315777	0.0160518			0.315777	0.0258901			0.315777	0.0243187			0.315777	0.0205117				0.104414	7.00162
																											0.316523	0.0201044			0.316523	0.016318			0.316523	0.0242552			0.316523	0.0222057			0.316523	0.0221312				0.104661	7.07401
																											0.317268	0.0212287			0.317268	0.0157834			0.317268	0.0262249			0.317268	0.0233165			0.317268	0.0214865				0.104907	7.15849
																											0.318014	0.0207387			0.318014	0.0170545			0.318014	0.0244688			0.318014	0.0237745			0.318014	0.020802				0.105154	7.09259
																											0.31876	0.0210598			0.31876	0.0168377			0.31876	0.0241475			0.31876	0.0224668			0.31876	0.0203178				0.1054	7.00292
																											0.319505	0.0208086			0.319505	0.0167802			0.319505	0.0241835			0.319505	0.0224049			0.319505	0.0203879				0.105647	6.94481
																											0.320251	0.020206			0.320251	0.0162939			0.320251	0.0247995			0.320251	0.0231298			0.320251	0.0214252				0.105893	6.9316
																											0.320997	0.0200625			0.320997	0.016943			0.320997	0.0247579			0.320997	0.023711			0.320997	0.0210943				0.10614	6.90522
																											0.321742	0.0205143			0.321742	0.0170251			0.321742	0.0248186			0.321742	0.0221307			0.321742	0.0210593				0.106386	6.87651
																											0.322488	0.0204515			0.322488	0.0162587			0.322488	0.0246213			0.322488	0.0226627			0.322488	0.0210346				0.106633	6.92193
																											0.323234	0.0214242			0.323234	0.0164774			0.323234	0.0245665			0.323234	0.0232936			0.323234	0.0208309				0.106879	6.96235
																											0.323979	0.0199117			0.323979	0.0160781			0.323979	0.0244993			0.323979	0.0241513			0.323979	0.0212662				0.107126	6.94369
																											0.324725	0.0205154			0.324725	0.0165672			0.324725	0.0242363			0.324725	0.0237761			0.324725	0.0209676				0.107372	6.94238
																											0.32547	0.0205394			0.32547	0.0163415			0.32547	0.0248256			0.32547	0.0231018			0.32547	0.0215139				0.107619	6.92226
																											0.326216	0.0211951			0.326216	0.0158009			0.326216	0.0248855			0.326216	0.0226389			0.326216	0.0215729				0.107865	6.82986
																											0.326962	0.0208018			0.326962	0.0155658			0.326962	0.0237518			0.326962	0.0222446			0.326962	0.0201063				0.108112	6.72776
																											0.327707	0.0195144			0.327707	0.0160443			0.327707	0.0248005			0.327707	0.0237686			0.327707	0.0215792				0.108358	6.74612
																											0.328453	0.0198603			0.328453	0.0161491			0.328453	0.0243005			0.328453	0.0226865			0.328453	0.0204137				0.108605	6.74966
																											0.329199	0.0194699			0.329199	0.0168195			0.329199	0.0241338			0.329199	0.0227977			0.329199	0.0208725				0.108851	6.76179
																											0.329944	0.0212785			0.329944	0.0154813			0.329944	0.0236653			0.329944	0.0236082			0.329944	0.0204348				0.109098	6.79413
																											0.33069	0.0202523			0.33069	0.0167788			0.33069	0.0250771			0.33069	0.0228951			0.33069	0.0197198				0.109344	6.87524
																											0.331436	0.0206705			0.331436	0.0160064			0.331436	0.0243654			0.331436	0.023112			0.331436	0.0200626				0.109591	6.89625
																											0.332181	0.0201502			0.332181	0.0161738			0.332181	0.0238723			0.332181	0.0227206			0.332181	0.0203473				0.109837	6.77652
																											0.332927	0.0214774			0.332927	0.0163273			0.332927	0.0232361			0.332927	0.02279			0.332927	0.021424				0.110084	6.73035
																											0.333672	0.0199314			0.333672	0.0160271			0.333672	0.0241632			0.333672	0.0221374			0.333672	0.0205011				0.11033	6.72304
																											0.334418	0.0203443			0.334418	0.0161965			0.334418	0.0255137			0.334418	0.022839			0.334418	0.0205856				0.110577	6.68927
																											0.335164	0.019975			0.335164	0.0165376			0.335164	0.0241641			0.335164	0.0226179			0.335164	0.0208804				0.110823	6.72757
																											0.335909	0.0197636			0.335909	0.01576			0.335909	0.0246048			0.335909	0.0232302			0.335909	0.0199243				0.11107	6.66292
																											0.336655	0.0212038			0.336655	0.0164722			0.336655	0.0241658			0.336655	0.0235669			0.336655	0.0188591				0.111316	6.5234
																											0.337401	0.0216145			0.337401	0.0159896			0.337401	0.0249362			0.337401	0.0226752			0.337401	0.021201				0.111563	6.58962
																											0.338146	0.0198805			0.338146	0.0165542			0.338146	0.0234347			0.338146	0.0230985			0.338146	0.019624				0.111809	6.71035
																											0.338892	0.0200464			0.338892	0.0165678			0.338892	0.0232301			0.338892	0.0231026			0.338892	0.0202451				0.112056	6.84817
																											0.339638	0.0198913			0.339638	0.0160901			0.339638	0.0230877			0.339638	0.0237558			0.339638	0.0211706				0.112302	6.87598
																											0.340383	0.0207888			0.340383	0.0165903			0.340383	0.0247902			0.340383	0.0229051			0.340383	0.0205186				0.112549	6.6984
																											0.341129	0.0206922			0.341129	0.0159445			0.341129	0.0236904			0.341129	0.0227875			0.341129	0.020825				0.112795	6.6235
																											0.341874	0.0208257			0.341874	0.0166835			0.341874	0.0241536			0.341874	0.0226341			0.341874	0.0202299				0.113042	6.71065
																											0.34262	0.0208965			0.34262	0.0152646			0.34262	0.0248078			0.34262	0.0230924			0.34262	0.0194999				0.113288	6.72911
																											0.343366	0.0212081			0.343366	0.0160934			0.343366	0.0262753			0.343366	0.0228647			0.343366	0.0198304				0.113535	6.67928
																											0.344111	0.0206571			0.344111	0.0159296			0.344111	0.0232538			0.344111	0.0224032			0.344111	0.0196314				0.113781	6.59238
																											0.344857	0.0194462			0.344857	0.0152221			0.344857	0.0247546			0.344857	0.0231819			0.344857	0.0204119				0.114028	6.49693
																											0.345603	0.0200986			0.345603	0.0171158			0.345603	0.0244795			0.345603	0.0227824			0.345603	0.0192864				0.114274	6.53138
																											0.346348	0.021614			0.346348	0.0163833			0.346348	0.0248604			0.346348	0.0228195			0.346348	0.0207405				0.114521	6.56374
																											0.347094	0.020486			0.347094	0.0157885			0.347094	0.0227978			0.347094	0.0251221			0.347094	0.0197875				0.114767	6.57894
																											0.34784	0.0194846			0.34784	0.0163951			0.34784	0.0234008			0.34784	0.0243035			0.34784	0.0207404				0.115014	6.64891
																											0.348585	0.0196593			0.348585	0.017148			0.348585	0.0233307			0.348585	0.0237001			0.348585	0.0201048				0.11526	6.76285
																											0.349331	0.0194495			0.349331	0.0151554			0.349331	0.024096			0.349331	0.0228997			0.349331	0.0204108				0.115507	6.83768
																											0.350076	0.0198538			0.350076	0.0168238			0.350076	0.0235231			0.350076	0.0236172			0.350076	0.0202796				0.115753	6.74958
																											0.350822	0.0203035			0.350822	0.0156675			0.350822	0.0256399			0.350822	0.0242731			0.350822	0.0209019				0.116	6.63069
																											0.351568	0.0221757			0.351568	0.0162124			0.351568	0.0244662			0.351568	0.0228018			0.351568	0.0218094				0.116246	6.57409
																											0.352313	0.019854			0.352313	0.0159474			0.352313	0.0241686			0.352313	0.0232279			0.352313	0.0199786				0.116493	6.57692
																											0.353059	0.0187811			0.353059	0.0158279			0.353059	0.023229			0.353059	0.0224585			0.353059	0.0191743				0.116739	6.62852
																											0.353805	0.0201675			0.353805	0.0156055			0.353805	0.0235278			0.353805	0.0228482			0.353805	0.0194791				0.116985	6.58702
																											0.35455	0.0194629			0.35455	0.0157448			0.35455	0.0242638			0.35455	0.0233201			0.35455	0.0212156				0.117232	6.4907
																											0.355296	0.0178559			0.355296	0.0148568			0.355296	0.0251808			0.355296	0.0239014			0.355296	0.0198621				0.117478	6.47635
																											0.356042	0.0198518			0.356042	0.0154754			0.356042	0.0230927			0.356042	0.0221776			0.356042	0.0207719				0.117725	6.45936
																											0.356787	0.0202446			0.356787	0.0164008			0.356787	0.0241166			0.356787	0.0209817			0.356787	0.021078				0.117971	6.48345
																											0.357533	0.0204136			0.357533	0.0154946			0.357533	0.0234928			0.357533	0.0227579			0.357533	0.0210262				0.118218	6.53233
																											0.358279	0.0221974			0.358279	0.0154696			0.358279	0.0247313			0.358279	0.0212623			0.358279	0.0192496				0.118464	6.50138
																											0.359024	0.0195557			0.359024	0.0157145			0.359024	0.0238163			0.359024	0.0217682			0.359024	0.0198007				0.118711	6.52642
																											0.35977	0.0195302			0.35977	0.0168565			0.35977	0.0235868			0.35977	0.0221059			0.35977	0.0195316				0.118957	6.54867
																											0.360515	0.0207164			0.360515	0.0154935			0.360515	0.0246482			0.360515	0.0241136			0.360515	0.0196861				0.119204	6.50802
																											0.361261	0.0192785			0.361261	0.0157484			0.361261	0.0256991			0.361261	0.0240184			0.361261	0.0200048				0.11945	6.44481
																											0.362007	0.0196279			0.362007	0.0160059			0.362007	0.0230424			0.362007	0.0254061			0.362007	0.0200918				0.119697	6.4348
																											0.362752	0.0198357			0.362752	0.015078			0.362752	0.0236692			0.362752	0.0228718			0.362752	0.0199664				0.119943	6.52056
																											0.363498	0.0188181			0.363498	0.0173918			0.363498	0.0237906			0.363498	0.0221512			0.363498	0.0192578				0.12019	6.5181
																											0.364244	0.0195323			0.364244	0.0166968			0.364244	0.0224808			0.364244	0.0241403			0.364244	0.0197267				0.120436	6.50734
																											0.364989	0.0211138			0.364989	0.01522			0.364989	0.0243117			0.364989	0.0231925			0.364989	0.0194134				0.120683	6.55683
																											0.365735	0.0198894			0.365735	0.0156418			0.365735	0.0229008			0.365735	0.0232509			0.365735	0.0216104				0.120929	6.53299
																											0.366481	0.0199661			0.366481	0.0161931			0.366481	0.0250782			0.366481	0.0240978			0.366481	0.0200566				0.121176	6.52897
																											0.367226	0.0176779			0.367226	0.016357			0.367226	0.0258694			0.367226	0.0225308			0.367226	0.0195797				0.121422	6.50736
																											0.367972	0.0199183			0.367972	0.0158575			0.367972	0.0226248			0.367972	0.0230719			0.367972	0.0197119				0.121669	6.33738
																											0.368717	0.0192704			0.368717	0.0164773			0.368717	0.024503			0.368717	0.0223565			0.368717	0.0200184				0.121915	6.29893
																											0.369463	0.0192341			0.369463	0.0146613			0.369463	0.0241425			0.369463	0.0212069			0.369463	0.0219803				0.122161	6.43321
																											0.370209	0.020452			0.370209	0.0161107			0.370209	0.0237162			0.370209	0.0229242			0.370209	0.0201278				0.122408	6.52913
																											0.370954	0.0192474			0.370954	0.0163631			0.370954	0.0242608			0.370954	0.0228851			0.370954	0.0189528				0.122654	6.5287
																											0.3717	0.018624			0.3717	0.015193			0.3717	0.0233339			0.3717	0.0208648			0.3717	0.0193725				0.122901	6.48704
																											0.372446	0.0212008			0.372446	0.0162023			0.372446	0.0227581			0.372446	0.0236728			0.372446	0.0213653				0.123147	6.44667
																											0.373191	0.0193286			0.373191	0.0168865			0.373191	0.0264331			0.373191	0.0238446			0.373191	0.019872				0.123394	6.3643
																											0.373937	0.0186701			0.373937	0.016242			0.373937	0.0259107			0.373937	0.0219235			0.373937	0.0188787				0.12364	6.29916
																											0.374682	0.0203997			0.374682	0.0153028			0.374682	0.0232956			0.374682	0.0222671			0.374682	0.0205458				0.123887	6.33353
																											0.375428	0.0188074			0.375428	0.0172664			0.375428	0.0242694			0.375428	0.0240431			0.375428	0.0200817				0.124133	6.33737
																											0.376174	0.0189112			0.376174	0.0160592			0.376174	0.0237767			0.376174	0.0214008			0.376174	0.0190836				0.12438	6.36875
																											0.376919	0.0186643			0.376919	0.0160301			0.376919	0.0233381			0.376919	0.0227386			0.376919	0.0191676				0.124626	6.46856
																											0.377665	0.0193816			0.377665	0.0156668			0.377665	0.0222552			0.377665	0.0237789			0.377665	0.0205366				0.124873	6.45245
																											0.378411	0.0197439			0.378411	0.016644			0.378411	0.0227775			0.378411	0.0235125			0.378411	0.0188717				0.125119	6.37096
																											0.379156	0.0205105			0.379156	0.015881			0.379156	0.0240112			0.379156	0.0239741			0.379156	0.0206618				0.125366	6.33157
																											0.379902	0.0189947			0.379902	0.0158965			0.379902	0.023978			0.379902	0.0212563			0.379902	0.019199				0.125612	6.3685
																											0.380648	0.0187687			0.380648	0.0162811			0.380648	0.0226222			0.380648	0.0228178			0.380648	0.0202147				0.125859	6.41617
																											0.381393	0.0199529			0.381393	0.0155991			0.381393	0.0239672			0.381393	0.022277			0.381393	0.0192077				0.126105	6.38582
																											0.382139	0.0195612			0.382139	0.0144852			0.382139	0.0243519			0.382139	0.0226689			0.382139	0.0196596				0.126351	6.36562
																											0.382885	0.0188187			0.382885	0.0155589			0.382885	0.0225692			0.382885	0.0215836			0.382885	0.0203957				0.126598	6.34253
																											0.38363	0.0201328			0.38363	0.0161429			0.38363	0.0226419			0.38363	0.0224424			0.38363	0.0195015				0.126844	6.30616
																											0.384376	0.0194859			0.384376	0.014594			0.384376	0.0234074			0.384376	0.0200829			0.384376	0.0199005				0.127091	6.28601
																											0.385121	0.0203446			0.385121	0.0156774			0.385121	0.0221721			0.385121	0.0220772			0.385121	0.0200721				0.127337	6.27322
																											0.385867	0.0179921			0.385867	0.0159066			0.385867	0.0221239			0.385867	0.0221499			0.385867	0.0190251				0.127584	6.24967
																											0.386613	0.0191539			0.386613	0.015724			0.386613	0.0224325			0.386613	0.0237678			0.386613	0.0183744				0.12783	6.25834
																											0.387358	0.0194868			0.387358	0.014769			0.387358	0.0231013			0.387358	0.0219401			0.387358	0.0185139				0.128077	6.29626
																											0.388104	0.0190591			0.388104	0.0155856			0.388104	0.0222073			0.388104	0.0225122			0.388104	0.0191077				0.128323	6.30559
																											0.38885	0.0197724			0.38885	0.0142859			0.38885	0.0228619			0.38885	0.0219079			0.38885	0.0205686				0.12857	6.24951
																											0.389595	0.019784			0.389595	0.0161294			0.389595	0.0220379			0.389595	0.0224504			0.389595	0.0205852				0.128816	6.22013
																											0.390341	0.0168942			0.390341	0.0155414			0.390341	0.0246762			0.390341	0.02382			0.390341	0.0182961				0.129063	6.2861
																											0.391087	0.0200369			0.391087	0.0166848			0.391087	0.0224529			0.391087	0.0221025			0.391087	0.0209949				0.129309	6.26154
																											0.391832	0.0195104			0.391832	0.0143912			0.391832	0.0224286			0.391832	0.0208395			0.391832	0.0184735				0.129555	6.19482
																											0.392578	0.0188317			0.392578	0.0164687			0.392578	0.0251061			0.392578	0.0234618			0.392578	0.0183222				0.129802	6.20533
																											0.393323	0.0208128			0.393323	0.016333			0.393323	0.0233979			0.393323	0.0209889			0.393323	0.0203493				0.130048	6.18769
																											0.394069	0.0192877			0.394069	0.0169174			0.394069	0.0245959			0.394069	0.0243967			0.394069	0.0195925				0.130295	6.15703
																											0.394815	0.0191481			0.394815	0.0164316			0.394815	0.0247303			0.394815	0.0211282			0.394815	0.0200224				0.130541	6.21575
																											0.39556	0.0191551			0.39556	0.0144705			0.39556	0.0234019			0.39556	0.02278			0.39556	0.0198329				0.130788	6.25198
																											0.396306	0.0199326			0.396306	0.0154749			0.396306	0.0269684			0.396306	0.0223802			0.396306	0.0206701				0.131034	6.19557
																											0.397052	0.0183962			0.397052	0.0173269			0.397052	0.0232626			0.397052	0.0211916			0.397052	0.0191154				0.131281	6.13355
																											0.397797	0.0203			0.397797	0.0151343			0.397797	0.0232953			0.397797	0.0227239			0.397797	0.0179184				0.131527	6.10566
																											0.398543	0.0201047			0.398543	0.0158504			0.398543	0.0197212			0.398543	0.02204			0.398543	0.0188573				0.131774	6.06079
																											0.399289	0.0190761			0.399289	0.0160238			0.399289	0.0252827			0.399289	0.0211832			0.399289	0.0191263				0.13202	5.99017
																											0.400034	0.0178666			0.400034	0.0157703			0.400034	0.0237406			0.400034	0.0224451			0.400034	0.0172748				0.132266	6.0319
																											0.40078	0.0197368			0.40078	0.015908			0.40078	0.0231677			0.40078	0.0202549			0.40078	0.0190987				0.132513	6.10588
																											0.401525	0.0183937			0.401525	0.017604			0.401525	0.0259043			0.401525	0.0232225			0.401525	0.0199161				0.132759	6.08626
																											0.402271	0.0198008			0.402271	0.0149012			0.402271	0.024814			0.402271	0.0215299			0.402271	0.0190294				0.133006	6.0437
																											0.403017	0.0195738			0.403017	0.0171943			0.403017	0.0231635			0.403017	0.0213329			0.403017	0.0194745				0.133252	6.06407
																											0.403762	0.0178999			0.403762	0.0142259			0.403762	0.0230809			0.403762	0.022057			0.403762	0.0198365				0.133499	6.07866
																											0.404508	0.0186			0.404508	0.0160441			0.404508	0.0226421			0.404508	0.0218212			0.404508	0.0171217				0.133745	6.0925
																											0.405254	0.0203299			0.405254	0.0136869			0.405254	0.0258741			0.405254	0.021429			0.405254	0.0180618				0.133992	6.16031
																											0.405999	0.0195023			0.405999	0.0151991			0.405999	0.0245357			0.405999	0.0228467			0.405999	0.0190689				0.134238	6.18684
																											0.406745	0.01946			0.406745	0.0137494			0.406745	0.0243636			0.406745	0.0207296			0.406745	0.0185486				0.134485	6.11875
																											0.407491	0.0177995			0.407491	0.0156396			0.407491	0.0236552			0.407491	0.0208217			0.407491	0.0193504				0.134731	6.06863
																											0.408236	0.0193783			0.408236	0.0145076			0.408236	0.021408			0.408236	0.0196209			0.408236	0.0192544				0.134977	6.08934
																											0.408982	0.0194706			0.408982	0.0148969			0.408982	0.0228997			0.408982	0.0224124			0.408982	0.0210868				0.135224	6.13648
																											0.409727	0.017504			0.409727	0.0161521			0.409727	0.0249265			0.409727	0.0202097			0.409727	0.020359				0.13547	6.20431
																											0.410473	0.0194968			0.410473	0.0171067			0.410473	0.0258251			0.410473	0.0227396			0.410473	0.0190364				0.135717	6.25181
																											0.411219	0.0178842			0.411219	0.0150547			0.411219	0.0206815			0.411219	0.0206187			0.411219	0.0191564				0.135963	6.24607
																											0.411964	0.0177693			0.411964	0.0156342			0.411964	0.0239965			0.411964	0.023271			0.411964	0.0190121				0.13621	6.21485
																											0.41271	0.0193857			0.41271	0.0144899			0.41271	0.0229621			0.41271	0.0214862			0.41271	0.0166216				0.136456	6.19465
																											0.413456	0.0209575			0.413456	0.0140735			0.413456	0.0222069			0.413456	0.0212765			0.413456	0.019122				0.136703	6.19768
																											0.414201	0.0206175			0.414201	0.0168215			0.414201	0.0247132			0.414201	0.0214955			0.414201	0.0187605				0.136949	6.22992
																											0.414947	0.0192434			0.414947	0.0161632			0.414947	0.0252525			0.414947	0.018968			0.414947	0.0205287				0.137195	6.25931
																											0.415693	0.0191684			0.415693	0.0149088			0.415693	0.0207689			0.415693	0.0200578			0.415693	0.0171066				0.137442	6.21365
																											0.416438	0.0215311			0.416438	0.0176822			0.416438	0.0206685			0.416438	0.022132			0.416438	0.0204682				0.137688	6.12666
																											0.417184	0.0185758			0.417184	0.0158533			0.417184	0.0234024			0.417184	0.0202111			0.417184	0.0179152				0.137935	6.06243
																											0.417929	0.0192432			0.417929	0.0156195			0.417929	0.0223183			0.417929	0.0230647			0.417929	0.0193202				0.138181	6.11564
																											0.418675	0.0187923			0.418675	0.0154138			0.418675	0.0252486			0.418675	0.0202705			0.418675	0.0203578				0.138428	6.14488
																											0.419421	0.0205692			0.419421	0.0165215			0.419421	0.0237541			0.419421	0.0202959			0.419421	0.0185624				0.138674	6.11712
																											0.420166	0.0188351			0.420166	0.0177955			0.420166	0.0241367			0.420166	0.0216244			0.420166	0.0189843				0.138921	6.1486
																											0.420912	0.0172936			0.420912	0.0152574			0.420912	0.0214491			0.420912	0.0232548			0.420912	0.0175				0.139167	6.20217
																											0.421658	0.0193507			0.421658	0.0161193			0.421658	0.0239716			0.421658	0.0206699			0.421658	0.0195349				0.139413	6.20238
																											0.422403	0.0193955			0.422403	0.0139574			0.422403	0.0204233			0.422403	0.0233011			0.422403	0.0199985				0.13966	6.09856
																											0.423149	0.0207788			0.423149	0.0150374			0.423149	0.0258291			0.423149	0.022468			0.423149	0.0184474				0.139906	6.06549
																											0.423895	0.0179544			0.423895	0.0158948			0.423895	0.0251712			0.423895	0.0208073			0.423895	0.017826				0.140153	6.11035
																											0.42464	0.020823			0.42464	0.0162987			0.42464	0.0215787			0.42464	0.021333			0.42464	0.0205923				0.140399	6.10599
																											0.425386	0.0198252			0.425386	0.013731			0.425386	0.0238859			0.425386	0.0238747			0.425386	0.0182771				0.140646	6.02816
																											0.426131	0.0213086			0.426131	0.0158101			0.426131	0.0247903			0.426131	0.0223109			0.426131	0.0178798				0.140892	5.99716
																											0.426877	0.0205332			0.426877	0.0148591			0.426877	0.02349			0.426877	0.0195641			0.426877	0.0185696				0.141139	6.04787
																											0.427623	0.0205366			0.427623	0.0167292			0.427623	0.0198606			0.427623	0.0226289			0.427623	0.0157911				0.141385	6.08189
																											0.428368	0.0195863			0.428368	0.0139406			0.428368	0.021899			0.428368	0.0211361			0.428368	0.0197043				0.141631	6.0781
																											0.429114	0.0195983			0.429114	0.0149367			0.429114	0.0252328			0.429114	0.0192178			0.429114	0.0188483				0.141878	6.07401
																											0.42986	0.0188043			0.42986	0.0188483			0.42986	0.0227567			0.42986	0.0203421			0.42986	0.0205263				0.142124	6.05168
																											0.430605	0.0214987			0.430605	0.0160196			0.430605	0.0243351			0.430605	0.0195695			0.430605	0.0180492				0.142371	6.01182
																											0.431351	0.0216781			0.431351	0.0147254			0.431351	0.0237937			0.431351	0.02167			0.431351	0.0186177				0.142617	5.98484
																											0.432097	0.0241487			0.432097	0.0174855			0.432097	0.0267279			0.432097	0.0225205			0.432097	0.0187097				0.142864	6.00277
																											0.432842	0.0188352			0.432842	0.0151116			0.432842	0.0264438			0.432842	0.0246303			0.432842	0.0178427				0.14311	6.03401
																											0.433588	0.0200165			0.433588	0.0147993			0.433588	0.0236139			0.433588	0.0200519			0.433588	0.0193095				0.143356	6.00193
																											0.434333	0.0192142			0.434333	0.0162005			0.434333	0.0213815			0.434333	0.0203966			0.434333	0.0182945				0.143603	5.96199
																											0.435079	0.0174698			0.435079	0.0148204			0.435079	0.0239499			0.435079	0.0225589			0.435079	0.0209208				0.143849	5.95043
																											0.435825	0.0247926			0.435825	0.0175033			0.435825	0.0252665			0.435825	0.0254743			0.435825	0.0208973				0.144096	5.95219
																											0.43657	0.0199847			0.43657	0.0178421			0.43657	0.0288452			0.43657	0.0230885			0.43657	0.0212158				0.144342	6.00917
																											0.437316	0.0237447			0.437316	0.0188416			0.437316	0.0277246			0.437316	0.0252462			0.437316	0.016848				0.144589	6.03312
																											0.438062	0.0214458			0.438062	0.0153721			0.438062	0.0253234			0.438062	0.0192214			0.438062	0.0200834				0.144835	5.93801
																											0.438807	0.0163689			0.438807	0.0125373			0.438807	0.0204421			0.438807	0.0187117			0.438807	0.0195603				0.145081	5.8825
																											0.439553	0.0218962			0.439553	0.0145428			0.439553	0.0210241			0.439553	0.020016			0.439553	0.0175588				0.145328	5.95053
																											0.440299	0.0186641			0.440299	0.015516			0.440299	0.0251684			0.440299	0.0236126			0.440299	0.0158691				0.145574	5.99731
																											0.441044	0.0224292			0.441044	0.0131271			0.441044	0.0254324			0.441044	0.0219555			0.441044	0.0204063				0.145821	5.98489
																											0.44179	0.017715			0.44179	0.0151977			0.44179	0.0212143			0.44179	0.0197268			0.44179	0.0185889				0.146067	5.95488
																											0.442535	0.0160307			0.442535	0.0156574			0.442535	0.0223924			0.442535	0.020449			0.442535	0.0151616				0.146314	5.96643
																											0.443281	0.0202481			0.443281	0.0178306			0.443281	0.0326221			0.443281	0.0266907			0.443281	0.0167288				0.14656	5.97613
																											0.444027	0.020304			0.444027	0.0178895			0.444027	0.0236798			0.444027	0.0277186			0.444027	0.0211697				0.146806	5.935
																											0.444772	0.0151279			0.444772	0.0124921			0.444772	0.0195206			0.444772	0.0210602			0.444772	0.0173694				0.147053	5.93764
																											0.445518	0.0138595			0.445518	0.0158768			0.445518	0.0184487			0.445518	0.0215415			0.445518	0.0175556				0.147299	5.97058
																											0.446264	0.0153246			0.446264	0.00742518			0.446264	0.0335923			0.446264	0.023982			0.446264	0.0190831				0.147546	5.89182
																											0.447009	0.00974229			0.447009	0.0170097			0.447009	0.0192328			0.447009	0.0198399			0.447009	0.0187353				0.147792	5.82097
																																																0.148039	5.82291
																																																0.148285	5.7919
																																																0.148531	5.78963
																																																0.148778	5.88543
																																																0.149024	5.8924
																																																0.149271	5.82439
																																																0.149517	5.82212
																																																0.149763	5.85774
																																																0.15001	5.92552
																																																0.150256	5.97561
																																																0.150503	5.9152
																																																0.150749	5.82966
																																																0.150996	5.79161
																																																0.151242	5.79136
																																																0.151488	5.76367
																																																0.151735	5.75983
																																																0.151981	5.77915
																																																0.152228	5.7783
																																																0.152474	5.83354
																																																0.15272	5.8781
																																																0.152967	5.79595
																																																0.153213	5.73627
																																																0.15346	5.76497
																																																0.153706	5.78821
																																																0.153953	5.77766
																																																0.154199	5.72858
																																																0.154445	5.75151
																																																0.154692	5.8352
																																																0.154938	5.85891
																																																0.155185	5.84633
																																																0.155431	5.84798
																																																0.155677	5.8085
																																																0.155924	5.71376
																																																0.15617	5.68218
																																																0.156417	5.72532
																																																0.156663	5.7247
																																																0.156909	5.69008
																																																0.157156	5.65976
																																																0.157402	5.61699
																																																0.157649	5.66273
																																																0.157895	5.74513
																																																0.158141	5.7142
																																																0.158388	5.65163
																																																0.158634	5.65872
																																																0.158881	5.65242
																																																0.159127	5.65686
																																																0.159373	5.65845
																																																0.15962	5.60747
																																																0.159866	5.56723
																																																0.160113	5.6265
																																																0.160359	5.68403
																																																0.160605	5.63208
																																																0.160852	5.61398
																																																0.161098	5.68874
																																																0.161345	5.67994
																																																0.161591	5.60033
																																																0.161837	5.63577
																																																0.162084	5.68643
																																																0.16233	5.69698
																																																0.162577	5.70254
																																																0.162823	5.71972
																																																0.163069	5.69255
																																																0.163316	5.60384
																																																0.163562	5.57242
																																																0.163809	5.5604
																																																0.164055	5.58995
																																																0.164301	5.64899
																																																0.164548	5.59343
																																																0.164794	5.57149
																																																0.16504	5.62042
																																																0.165287	5.64183
																																																0.165533	5.6171
																																																0.16578	5.55351
																																																0.166026	5.56848
																																																0.166272	5.62143
																																																0.166519	5.63182
																																																0.166765	5.6306
																																																0.167012	5.60877
																																																0.167258	5.53876
																																																0.167504	5.54171
																																																0.167751	5.57383
																																																0.167997	5.51658
																																																0.168243	5.5002
																																																0.16849	5.52602
																																																0.168736	5.57213
																																																0.168983	5.64043
																																																0.169229	5.62177
																																																0.169475	5.54569
																																																0.169722	5.48069
																																																0.169968	5.41711
																																																0.170214	5.4239
																																																0.170461	5.47546
																																																0.170707	5.44312
																																																0.170954	5.38247
																																																0.1712	5.39158
																																																0.171446	5.486
																																																0.171693	5.50688
																																																0.171939	5.4432
																																																0.172185	5.42834
																																																0.172432	5.45343
																																																0.172678	5.4771
																																																0.172924	5.49084
																																																0.173171	5.46646
																																																0.173417	5.44529
																																																0.173664	5.50508
																																																0.17391	5.51986
																																																0.174156	5.47195
																																																0.174403	5.45181
																																																0.174649	5.44153
																																																0.174895	5.44459
																																																0.175142	5.40008
																																																0.175388	5.34868
																																																0.175634	5.34065
																																																0.175881	5.35684
																																																0.176127	5.39472
																																																0.176374	5.40252
																																																0.17662	5.39501
																																																0.176866	5.43358
																																																0.177113	5.44813
																																																0.177359	5.38826
																																																0.177605	5.33666
																																																0.177852	5.38059
																																																0.178098	5.43588
																																																0.178344	5.43357
																																																0.178591	5.3742
																																																0.178837	5.26866
																																																0.179083	5.24555
																																																0.17933	5.28731
																																																0.179576	5.33023
																																																0.179823	5.34114
																																																0.180069	5.27815
																																																0.180315	5.28666
																																																0.180562	5.35641
																																																0.180808	5.36304
																																																0.181054	5.34463
																																																0.181301	5.31046
																																																0.181547	5.31634
																																																0.181793	5.36114
																																																0.18204	5.29813
																																																0.182286	5.23299
																																																0.182532	5.20655
																																																0.182779	5.21184
																																																0.183025	5.22738
																																																0.183271	5.17926
																																																0.183518	5.18531
																																																0.183764	5.27505
																																																0.18401	5.26347
																																																0.184257	5.17456
																																																0.184503	5.12288
																																																0.184749	5.20318
																																																0.184996	5.29635
																																																0.185242	5.25467
																																																0.185488	5.21692
																																																0.185735	5.23738
																																																0.185981	5.26352
																																																0.186227	5.26815
																																																0.186474	5.21369
																																																0.18672	5.16535
																																																0.186966	5.1103
																																																0.187213	5.06872
																																																0.187459	5.12374
																																																0.187705	5.20167
																																																0.187952	5.23575
																																																0.188198	5.25574
																																																0.188444	5.18129
																																																0.188691	5.152
																																																0.188937	5.15348
																																																0.189183	5.13337
																																																0.18943	5.12645
																																																0.189676	5.1181
																																																0.189922	5.13509
																																																0.190169	5.14649
																																																0.190415	5.09329
																																																0.190661	5.07684
																																																0.190908	5.13279
																																																0.191154	5.14701
																																																0.1914	5.16083
																																																0.191647	5.15124
																																																0.191893	5.07952
																																																0.192139	5.05184
																																																0.192386	5.0758
																																																0.192632	5.09781
																																																0.192878	5.09363
																																																0.193124	5.08888
																																																0.193371	5.09815
																																																0.193617	5.09624
																																																0.193863	5.07901
																																																0.19411	5.06682
																																																0.194356	5.04924
																																																0.194602	5.05309
																																																0.194849	5.01493
																																																0.195095	4.98323
																																																0.195341	5.03724
																																																0.195588	5.04721
																																																0.195834	5.057
																																																0.19608	5.11209
																																																0.196326	5.11638
																																																0.196573	5.055
																																																0.196819	5.0239
																																																0.197065	5.03674
																																																0.197312	5.01521
																																																0.197558	4.95744
																																																0.197804	5.01285
																																																0.198051	5.03651
																																																0.198297	5.00767
																																																0.198543	5.00757
																																																0.19879	4.99877
																																																0.199036	5.00163
																																																0.199282	4.98476
																																																0.199528	4.94139
																																																0.199775	4.96506
																																																0.200021	4.9776
																																																0.200267	4.91594
																																																0.200514	4.91516
																																																0.20076	4.94693
																																																0.201006	4.95702
																																																0.201252	4.96437
																																																0.201499	4.99006
																																																0.201745	4.93623
																																																0.201991	4.82355
																																																0.202238	4.81278
																																																0.202484	4.85655
																																																0.20273	4.90989
																																																0.202977	4.88283
																																																0.203223	4.89436
																																																0.203469	4.93003
																																																0.203715	4.94895
																																																0.203962	4.95002
																																																0.204208	4.88739
																																																0.204454	4.8141
																																																0.204701	4.8138
																																																0.204947	4.93331
																																																0.205193	5.00097
																																																0.205439	4.95551
																																																0.205686	4.89135
																																																0.205932	4.87919
																																																0.206178	4.91565
																																																0.206424	4.92366
																																																0.206671	4.91244
																																																0.206917	4.883
																																																0.207163	4.8633
																																																0.20741	4.83753
																																																0.207656	4.83826
																																																0.207902	4.85262
																																																0.208148	4.86697
																																																0.208395	4.88137
																																																0.208641	4.88591
																																																0.208887	4.90374
																																																0.209133	4.89556
																																																0.20938	4.8304
																																																0.209626	4.88799
																																																0.209872	4.98232
																																																0.210119	4.94586
																																																0.210365	4.87734
																																																0.210611	4.8292
																																																0.210857	4.85633
																																																0.211104	4.93929
																																																0.21135	4.90626
																																																0.211596	4.82993
																																																0.211842	4.78599
																																																0.212089	4.77544
																																																0.212335	4.79307
																																																0.212581	4.78726
																																																0.212827	4.76147
																																																0.213074	4.78028
																																																0.21332	4.77067
																																																0.213566	4.7371
																																																0.213812	4.71897
																																																0.214059	4.72998
																																																0.214305	4.82759
																																																0.214551	4.87325
																																																0.214797	4.82111
																																																0.215044	4.75503
																																																0.21529	4.75641
																																																0.215536	4.78094
																																																0.215782	4.77943
																																																0.216029	4.76359
																																																0.216275	4.7401
																																																0.216521	4.69571
																																																0.216767	4.67041
																																																0.217014	4.72721
																																																0.21726	4.76167
																																																0.217506	4.74807
																																																0.217752	4.71341
																																																0.217999	4.71034
																																																0.218245	4.72261
																																																0.218491	4.73029
																																																0.218737	4.68979
																																																0.218984	4.65518
																																																0.21923	4.71139
																																																0.219476	4.77242
																																																0.219722	4.76586
																																																0.219969	4.74845
																																																0.220215	4.74477
																																																0.220461	4.77242
																																																0.220707	4.82635
																																																0.220954	4.75975
																																																0.2212	4.66414
																																																0.221446	4.65673
																																																0.221692	4.69848
																																																0.221938	4.73405
																																																0.222185	4.67924
																																																0.222431	4.63762
																																																0.222677	4.63004
																																																0.222923	4.66393
																																																0.22317	4.73974
																																																0.223416	4.73637
																																																0.223662	4.69754
																																																0.223908	4.66236
																																																0.224155	4.64902
																																																0.224401	4.65062
																																																0.224647	4.67922
																																																0.224893	4.71618
																																																0.225139	4.70038
																																																0.225386	4.65997
																																																0.225632	4.63897
																																																0.225878	4.5919
																																																0.226124	4.58091
																																																0.226371	4.61423
																																																0.226617	4.61482
																																																0.226863	4.60862
																																																0.227109	4.61078
																																																0.227355	4.58783
																																																0.227602	4.60148
																																																0.227848	4.61904
																																																0.228094	4.58238
																																																0.22834	4.59332
																																																0.228586	4.59105
																																																0.228833	4.59225
																																																0.229079	4.65493
																																																0.229325	4.6805
																																																0.229571	4.63282
																																																0.229817	4.58819
																																																0.230064	4.55933
																																																0.23031	4.53571
																																																0.230556	4.5107
																																																0.230802	4.53076
																																																0.231048	4.54029
																																																0.231295	4.52876
																																																0.231541	4.52022
																																																0.231787	4.55529
																																																0.232033	4.59068
																																																0.23228	4.58368
																																																0.232526	4.56174
																																																0.232772	4.57567
																																																0.233018	4.59094
																																																0.233264	4.55256
																																																0.23351	4.5262
																																																0.233757	4.49175
																																																0.234003	4.46807
																																																0.234249	4.51909
																																																0.234495	4.53828
																																																0.234741	4.58871
																																																0.234988	4.64146
																																																0.235234	4.64282
																																																0.23548	4.5992
																																																0.235726	4.5547
																																																0.235972	4.46644
																																																0.236219	4.45375
																																																0.236465	4.52042
																																																0.236711	4.57252
																																																0.236957	4.56799
																																																0.237203	4.60095
																																																0.237449	4.63938
																																																0.237696	4.59022
																																																0.237942	4.54875
																																																0.238188	4.57958
																																																0.238434	4.589
																																																0.23868	4.5585
																																																0.238927	4.48604
																																																0.239173	4.50129
																																																0.239419	4.51339
																																																0.239665	4.4919
																																																0.239911	4.49888
																																																0.240157	4.50847
																																																0.240404	4.51137
																																																0.24065	4.51793
																																																0.240896	4.52935
																																																0.241142	4.52307
																																																0.241388	4.46858
																																																0.241634	4.42918
																																																0.241881	4.43701
																																																0.242127	4.44212
																																																0.242373	4.4816
																																																0.242619	4.51346
																																																0.242865	4.43159
																																																0.243111	4.4002
																																																0.243358	4.45351
																																																0.243604	4.41799
																																																0.24385	4.39315
																																																0.244096	4.44703
																																																0.244342	4.44534
																																																0.244588	4.45463
																																																0.244835	4.48594
																																																0.245081	4.4829
																																																0.245327	4.47168
																																																0.245573	4.49483
																																																0.245819	4.46321
																																																0.246065	4.43673
																																																0.246311	4.43086
																																																0.246558	4.39531
																																																0.246804	4.35923
																																																0.24705	4.36036
																																																0.247296	4.38393
																																																0.247542	4.36301
																																																0.247788	4.34947
																																																0.248034	4.35973
																																																0.248281	4.36971
																																																0.248527	4.38742
																																																0.248773	4.41183
																																																0.249019	4.38488
																																																0.249265	4.31647
																																																0.249511	4.32296
																																																0.249757	4.36033
																																																0.250004	4.42038
																																																0.25025	4.43158
																																																0.250496	4.40309
																																																0.250742	4.3905
																																																0.250988	4.38647
																																																0.251234	4.34939
																																																0.25148	4.2778
																																																0.251727	4.26533
																																																0.251973	4.31145
																																																0.252219	4.38795
																																																0.252465	4.44331
																																																0.252711	4.47775
																																																0.252957	4.43347
																																																0.253203	4.34221
																																																0.253449	4.28537
																																																0.253696	4.2751
																																																0.253942	4.27354
																																																0.254188	4.30023
																																																0.254434	4.34859
																																																0.25468	4.34164
																																																0.254926	4.28559
																																																0.255172	4.27294
																																																0.255418	4.30487
																																																0.255665	4.3122
																																																0.255911	4.33006
																																																0.256157	4.36797
																																																0.256403	4.35773
																																																0.256649	4.32656
																																																0.256895	4.34011
																																																0.257141	4.34242
																																																0.257387	4.32916
																																																0.257633	4.34679
																																																0.25788	4.38843
																																																0.258126	4.40517
																																																0.258372	4.37106
																																																0.258618	4.32317
																																																0.258864	4.30914
																																																0.25911	4.26618
																																																0.259356	4.22941
																																																0.259602	4.2313
																																																0.259848	4.26692
																																																0.260095	4.25873
																																																0.260341	4.25609
																																																0.260587	4.23166
																																																0.260833	4.18201
																																																0.261079	4.19696
																																																0.261325	4.25111
																																																0.261571	4.27628
																																																0.261817	4.28381
																																																0.262063	4.25652
																																																0.262309	4.19005
																																																0.262555	4.19221
																																																0.262802	4.24803
																																																0.263048	4.28686
																																																0.263294	4.23372
																																																0.26354	4.20831
																																																0.263786	4.27849
																																																0.264032	4.3093
																																																0.264278	4.25834
																																																0.264524	4.2528
																																																0.26477	4.26057
																																																0.265016	4.23375
																																																0.265262	4.22138
																																																0.265509	4.26671
																																																0.265755	4.25471
																																																0.266001	4.20225
																																																0.266247	4.19054
																																																0.266493	4.21474
																																																0.266739	4.23218
																																																0.266985	4.25889
																																																0.267231	4.30824
																																																0.267477	4.28498
																																																0.267723	4.23061
																																																0.267969	4.21403
																																																0.268215	4.25193
																																																0.268461	4.2673
																																																0.268708	4.21923
																																																0.268954	4.18625
																																																0.2692	4.14966
																																																0.269446	4.16955
																																																0.269692	4.1958
																																																0.269938	4.19138
																																																0.270184	4.19915
																																																0.27043	4.24616
																																																0.270676	4.26682
																																																0.270922	4.22107
																																																0.271168	4.17103
																																																0.271414	4.18695
																																																0.27166	4.20865
																																																0.271906	4.19682
																																																0.272152	4.21184
																																																0.272398	4.20839
																																																0.272645	4.14373
																																																0.272891	4.12472
																																																0.273137	4.12741
																																																0.273383	4.10148
																																																0.273629	4.07554
																																																0.273875	4.12124
																																																0.274121	4.16242
																																																0.274367	4.14545
																																																0.274613	4.12725
																																																0.274859	4.14426
																																																0.275105	4.17115
																																																0.275351	4.19134
																																																0.275597	4.21194
																																																0.275843	4.24264
																																																0.276089	4.23871
																																																0.276335	4.21173
																																																0.276581	4.22136
																																																0.276827	4.21204
																																																0.277073	4.12933
																																																0.277319	4.05368
																																																0.277565	4.04441
																																																0.277811	4.06701
																																																0.278057	4.11325
																																																0.278304	4.13444
																																																0.27855	4.14096
																																																0.278796	4.16819
																																																0.279042	4.10257
																																																0.279288	4.02474
																																																0.279534	4.08206
																																																0.27978	4.15123
																																																0.280026	4.20944
																																																0.280272	4.20247
																																																0.280518	4.15417
																																																0.280764	4.15082
																																																0.28101	4.15572
																																																0.281256	4.07033
																																																0.281502	4.02804
																																																0.281748	4.07157
																																																0.281994	4.11558
																																																0.28224	4.12961
																																																0.282486	4.14341
																																																0.282732	4.12848
																																																0.282978	4.06818
																																																0.283224	4.01949
																																																0.28347	4.03361
																																																0.283716	4.10155
																																																0.283962	4.09174
																																																0.284208	4.04794
																																																0.284454	4.07284
																																																0.2847	4.08495
																																																0.284946	4.0437
																																																0.285192	4.0634
																																																0.285438	4.14674
																																																0.285684	4.15768
																																																0.28593	4.08955
																																																0.286176	4.0627
																																																0.286422	4.08766
																																																0.286668	4.08089
																																																0.286914	4.05842
																																																0.28716	4.028
																																																0.287406	4.02527
																																																0.287652	4.00668
																																																0.287898	3.98438
																																																0.288144	4.02118
																																																0.28839	4.07638
																																																0.288636	4.06653
																																																0.288882	4.03523
																																																0.289128	4.02907
																																																0.289374	4.03057
																																																0.28962	4.06077
																																																0.289866	4.06723
																																																0.290112	4.0184
																																																0.290358	3.98421
																																																0.290604	3.98289
																																																0.29085	4.01605
																																																0.291096	4.06452
																																																0.291342	4.10158
																																																0.291588	4.14388
																																																0.291834	4.12535
																																																0.29208	4.05816
																																																0.292326	4.00218
																																																0.292572	4.00349
																																																0.292818	4.04035
																																																0.293064	4.05269
																																																0.29331	4.03115
																																																0.293556	4.00478
																																																0.293802	3.99455
																																																0.294048	4.02209
																																																0.294294	4.01516
																																																0.29454	4.02131
																																																0.294786	4.05225
																																																0.295032	4.05842
																																																0.295277	4.03149
																																																0.295523	3.96887
																																																0.295769	3.93226
																																																0.296015	3.93746
																																																0.296261	3.94075
																																																0.296507	3.96518
																																																0.296753	3.9568
																																																0.296999	3.97055
																																																0.297245	4.00377
																																																0.297491	4.05799
																																																0.297737	4.03004
																																																0.297983	3.97463
																																																0.298229	3.97195
																																																0.298475	3.98069
																																																0.298721	3.99913
																																																0.298967	4.05718
																																																0.299213	4.07024
																																																0.299459	4.0238
																																																0.299705	3.97657
																																																0.299951	3.96692
																																																0.300197	3.96959
																																																0.300443	3.9566
																																																0.300688	3.92059
																																																0.300934	3.92264
																																																0.30118	3.96157
																																																0.301426	3.9762
																																																0.301672	3.92556
																																																0.301918	3.91202
																																																0.302164	3.91829
																																																0.30241	3.92948
																																																0.302656	3.9539
																																																0.302902	3.94398
																																																0.303148	3.93341
																																																0.303394	3.93205
																																																0.30364	3.93486
																																																0.303886	3.93183
																																																0.304132	3.90268
																																																0.304377	3.90109
																																																0.304623	3.90375
																																																0.304869	3.90216
																																																0.305115	3.92505
																																																0.305361	3.96751
																																																0.305607	3.92149
																																																0.305853	3.89654
																																																0.306099	3.93984
																																																0.306345	3.92262
																																																0.306591	3.91784
																																																0.306837	3.99231
																																																0.307083	4.0227
																																																0.307328	3.97222
																																																0.307574	3.95795
																																																0.30782	3.9376
																																																0.308066	3.87303
																																																0.308312	3.83218
																																																0.308558	3.85438
																																																0.308804	3.90883
																																																0.30905	3.9242
																																																0.309296	3.91885
																																																0.309542	3.91042
																																																0.309788	3.90995
																																																0.310033	3.93018
																																																0.310279	3.9766
																																																0.310525	3.98497
																																																0.310771	3.9466
																																																0.311017	3.89796
																																																0.311263	3.89991
																																																0.311509	3.92261
																																																0.311755	3.94522
																																																0.312001	3.9271
																																																0.312247	3.93204
																																																0.312492	3.97074
																																																0.312738	3.96905
																																																0.312984	3.92997
																																																0.31323	3.87891
																																																0.313476	3.83598
																																																0.313722	3.81185
																																																0.313968	3.85762
																																																0.314214	3.88004
																																																0.31446	3.89393
																																																0.314705	3.8884
																																																0.314951	3.85749
																																																0.315197	3.85516
																																																0.315443	3.94184
																																																0.315689	3.97225
																																																0.315935	3.86531
																																																0.316181	3.83314
																																																0.316427	3.87689
																																																0.316672	3.88218
																																																0.316918	3.8503
																																																0.317164	3.859
																																																0.31741	3.86231
																																																0.317656	3.90065
																																																0.317902	3.91819
																																																0.318148	3.87972
																																																0.318394	3.86415
																																																0.318639	3.87798
																																																0.318885	3.86951
																																																0.319131	3.85606
																																																0.319377	3.84442
																																																0.319623	3.84341
																																																0.319869	3.84244
																																																0.320115	3.82
																																																0.32036	3.81262
																																																0.320606	3.83168
																																																0.320852	3.89312
																																																0.321098	3.90484
																																																0.321344	3.86765
																																																0.32159	3.86819
																																																0.321836	3.89038
																																																0.322081	3.90914
																																																0.322327	3.90916
																																																0.322573	3.85504
																																																0.322819	3.826
																																																0.323065	3.85123
																																																0.323311	3.84427
																																																0.323556	3.83209
																																																0.323802	3.82673
																																																0.324048	3.82673
																																																0.324294	3.83731
																																																0.32454	3.80824
																																																0.324786	3.79886
																																																0.325031	3.84111
																																																0.325277	3.8631
																																																0.325523	3.86673
																																																0.325769	3.86984
																																																0.326015	3.86439
																																																0.326261	3.80296
																																																0.326506	3.80541
																																																0.326752	3.82951
																																																0.326998	3.80799
																																																0.327244	3.80386
																																																0.32749	3.78993
																																																0.327736	3.77277
																																																0.327981	3.77509
																																																0.328227	3.7906
																																																0.328473	3.83542
																																																0.328719	3.84319
																																																0.328965	3.81706
																																																0.329211	3.80385
																																																0.329456	3.76755
																																																0.329702	3.75855
																																																0.329948	3.80741
																																																0.330194	3.81674
																																																0.33044	3.79282
																																																0.330685	3.75298
																																																0.330931	3.74102
																																																0.331177	3.77481
																																																0.331423	3.81321
																																																0.331669	3.78733
																																																0.331914	3.72282
																																																0.33216	3.73153
																																																0.332406	3.76094
																																																0.332652	3.7456
																																																0.332898	3.71762
																																																0.333143	3.73522
																																																0.333389	3.76977
																																																0.333635	3.78193
																																																0.333881	3.78566
																																																0.334127	3.79138
																																																0.334372	3.78079
																																																0.334618	3.75859
																																																0.334864	3.74062
																																																0.33511	3.7259
																																																0.335356	3.73664
																																																0.335601	3.74679
																																																0.335847	3.73155
																																																0.336093	3.73397
																																																0.336339	3.79241
																																																0.336584	3.83481
																																																0.33683	3.80345
																																																0.337076	3.72573
																																																0.337322	3.66439
																																																0.337568	3.6496
																																																0.337813	3.69477
																																																0.338059	3.76314
																																																0.338305	3.76011
																																																0.338551	3.72556
																																																0.338796	3.70701
																																																0.339042	3.68958
																																																0.339288	3.72863
																																																0.339534	3.75596
																																																0.33978	3.77009
																																																0.340025	3.77309
																																																0.340271	3.77181
																																																0.340517	3.75864
																																																0.340763	3.74299
																																																0.341008	3.74983
																																																0.341254	3.76625
																																																0.3415	3.72453
																																																0.341746	3.68947
																																																0.341991	3.70371
																																																0.342237	3.73249
																																																0.342483	3.75273
																																																0.342729	3.753
																																																0.342974	3.69274
																																																0.34322	3.69761
																																																0.343466	3.74943
																																																0.343712	3.75704
																																																0.343957	3.74307
																																																0.344203	3.76353
																																																0.344449	3.76501
																																																0.344695	3.75029
																																																0.34494	3.7166
																																																0.345186	3.68794
																																																0.345432	3.68039
																																																0.345678	3.68313
																																																0.345923	3.70334
																																																0.346169	3.71437
																																																0.346415	3.734
																																																0.346661	3.72516
																																																0.346906	3.67747
																																																0.347152	3.67074
																																																0.347398	3.71521
																																																0.347643	3.74886
																																																0.347889	3.7364
																																																0.348135	3.684
																																																0.348381	3.66182
																																																0.348626	3.68411
																																																0.348872	3.6851
																																																0.349118	3.66621
																																																0.349364	3.67895
																																																0.349609	3.67417
																																																0.349855	3.6528
																																																0.350101	3.62621
																																																0.350346	3.59805
																																																0.350592	3.59985
																																																0.350838	3.65387
																																																0.351084	3.68801
																																																0.351329	3.70996
																																																0.351575	3.7114
																																																0.351821	3.71068
																																																0.352066	3.73666
																																																0.352312	3.7214
																																																0.352558	3.68396
																																																0.352803	3.64976
																																																0.353049	3.61978
																																																0.353295	3.60023
																																																0.353541	3.62244
																																																0.353786	3.63233
																																																0.354032	3.64343
																																																0.354278	3.63013
																																																0.354523	3.62564
																																																0.354769	3.62208
																																																0.355015	3.61156
																																																0.35526	3.62935
																																																0.355506	3.65359
																																																0.355752	3.67697
																																																0.355998	3.65517
																																																0.356243	3.60015
																																																0.356489	3.62606
																																																0.356735	3.68871
																																																0.35698	3.66262
																																																0.357226	3.60037
																																																0.357472	3.59643
																																																0.357717	3.64852
																																																0.357963	3.67051
																																																0.358209	3.66564
																																																0.358454	3.66095
																																																0.3587	3.65653
																																																0.358946	3.67468
																																																0.359191	3.70025
																																																0.359437	3.67463
																																																0.359683	3.64279
																																																0.359928	3.63484
																																																0.360174	3.61316
																																																0.36042	3.58662
																																																0.360665	3.57902
																																																0.360911	3.55259
																																																0.361157	3.56226
																																																0.361402	3.57557
																																																0.361648	3.57236
																																																0.361894	3.59855
																																																0.362139	3.63791
																																																0.362385	3.66883
																																																0.362631	3.64699
																																																0.362876	3.58619
																																																0.363122	3.57116
																																																0.363368	3.57979
																																																0.363613	3.54173
																																																0.363859	3.47567
																																																0.364105	3.52492
																																																0.36435	3.63106
																																																0.364596	3.6642
																																																0.364841	3.64506
																																																0.365087	3.59977
																																																0.365333	3.60521
																																																0.365578	3.60092
																																																0.365824	3.56207
																																																0.36607	3.54467
																																																0.366315	3.5859
																																																0.366561	3.59609
																																																0.366807	3.57322
																																																0.367052	3.54784
																																																0.367298	3.55746
																																																0.367543	3.57585
																																																0.367789	3.62216
																																																0.368035	3.60274
																																																0.36828	3.57025
																																																0.368526	3.57409
																																																0.368772	3.59701
																																																0.369017	3.59457
																																																0.369263	3.56576
																																																0.369508	3.54511
																																																0.369754	3.56089
																																																0.37	3.59897
																																																0.370245	3.58197
																																																0.370491	3.52912
																																																0.370737	3.54292
																																																0.370982	3.59299
																																																0.371228	3.61298
																																																0.371473	3.58102
																																																0.371719	3.52728
																																																0.371965	3.4858
																																																0.37221	3.49021
																																																0.372456	3.51603
																																																0.372701	3.526
																																																0.372947	3.5349
																																																0.373193	3.52542
																																																0.373438	3.50326
																																																0.373684	3.5255
																																																0.373929	3.55503
																																																0.374175	3.55803
																																																0.374421	3.54182
																																																0.374666	3.52826
																																																0.374912	3.55961
																																																0.375157	3.55962
																																																0.375403	3.57232
																																																0.375648	3.54425
																																																0.375894	3.49467
																																																0.37614	3.53097
																																																0.376385	3.57145
																																																0.376631	3.581
																																																0.376876	3.5298
																																																0.377122	3.52445
																																																0.377368	3.56317
																																																0.377613	3.57555
																																																0.377859	3.5617
																																																0.378104	3.55635
																																																0.37835	3.58223
																																																0.378595	3.62114
																																																0.378841	3.58094
																																																0.379087	3.50732
																																																0.379332	3.49781
																																																0.379578	3.55376
																																																0.379823	3.5634
																																																0.380069	3.52708
																																																0.380314	3.49725
																																																0.38056	3.50793
																																																0.380806	3.5437
																																																0.381051	3.55167
																																																0.381297	3.52706
																																																0.381542	3.47239
																																																0.381788	3.47492
																																																0.382033	3.50955
																																																0.382279	3.51312
																																																0.382524	3.53027
																																																0.38277	3.59187
																																																0.383016	3.60411
																																																0.383261	3.54905
																																																0.383507	3.48062
																																																0.383752	3.44956
																																																0.383998	3.46417
																																																0.384243	3.49093
																																																0.384489	3.49581
																																																0.384734	3.47871
																																																0.38498	3.45577
																																																0.385225	3.4455
																																																0.385471	3.42134
																																																0.385716	3.43137
																																																0.385962	3.49412
																																																0.386208	3.5287
																																																0.386453	3.52206
																																																0.386699	3.50987
																																																0.386944	3.48889
																																																0.38719	3.47754
																																																0.387435	3.48601
																																																0.387681	3.52213
																																																0.387926	3.47552
																																																0.388172	3.44928
																																																0.388417	3.46869
																																																0.388663	3.46227
																																																0.388908	3.47694
																																																0.389154	3.48368
																																																0.389399	3.47359
																																																0.389645	3.48325
																																																0.38989	3.46357
																																																0.390136	3.46155
																																																0.390381	3.45602
																																																0.390627	3.45356
																																																0.390872	3.45698
																																																0.391118	3.4492
																																																0.391363	3.43103
																																																0.391609	3.41066
																																																0.391854	3.42413
																																																0.3921	3.44468
																																																0.392345	3.46229
																																																0.392591	3.45764
																																																0.392836	3.37559
																																																0.393082	3.2672
																																																0.393327	3.17826
																																																0.393573	3.06583
																																																0.393818	2.97308
																																																0.394064	2.89869
																																																0.394309	2.83501
																																																0.394555	2.74936
																																																0.3948	2.66952
																																																0.395046	2.62992
																																																0.395291	2.58052
																																																0.395537	2.48412
																																																0.395782	2.3399
																																																0.396028	2.20422
																																																0.396273	2.08701
																																																0.396519	2.00116
																																																0.396764	1.94926
																																																0.39701	1.88551
																																																0.397255	1.79528
																																																0.3975	1.69704
																																																0.397746	1.58287
																																																0.397991	1.49541
																																																0.398237	1.42111
																																																0.398482	1.33825
																																																0.398728	1.23379
																																																0.398973	1.11413
																																																0.399219	0.986382
																																																0.399464	0.886018
																																																0.39971	0.797796
																																																0.399955	0.723018
																																																0.400201	0.628043
																																																0.400446	0.47068
																																																0.400691	0.289727
																																																0.400937	0.13257
																																																0.401182	0.0604324
																																																0.401428	0.0519834
																																																0.401673	0.0496032
																																																0.401919	0.0425388
																																																0.402164	0.0456832
																																																0.40241	0.0462688
																																																0.402655	0.0426618
																																																0.4029	0.0341547
																																																0.403146	0.0399992
																																																0.403391	0.0498512
																																																0.403637	0.0543242
																																																0.403882	0.0529516
																																																0.404128	0.0442824
																																																0.404373	0.0432662
																																																0.404618	0.0492442
																																																0.404864	0.0518571
																																																0.405109	0.0576626
																																																0.405355	0.0698728
																																																0.4056	0.0685595
																																																0.405846	0.0540562
																																																0.406091	0.0347509
																																																0.406336	0.0234226
																																																0.406582	0.0394413
																																																0.406827	0.0470582
																																																0.407073	0.0387029
																																																0.407318	0.0421085
																																																0.407564	0.0451549
																																																0.407809	0.0348232
																																																0.408054	0.0305646
																																																0.4083	0.0355758
																																																0.408545	0.0406288
																																																0.408791	0.0334225
																																																0.409036	0.0196205
																																																0.409281	0.0182583
																																																0.409527	0.0320559
																																																0.409772	0.0434042
																																																0.410018	0.0316033
																																																0.410263	0.00965376
																																																0.410508	0.00819517
																																																0.410754	0.0276543
																																																0.410999	0.0422023
																																																0.411245	0.0439261
																																																0.41149	0.0533397
																																																0.411735	0.0699473
																																																0.411981	0.0691162
																																																0.412226	0.0380955
																																																0.412471	0.0168874
																																																0.412717	0.0382078
																																																0.412962	0.0492377
																																																0.413208	0.0284396
																																																0.413453	0.0194391
																																																0.413698	0.0338202
																																																0.413944	0.0461794
																																																0.414189	0.063795
																																																0.414434	0.0675099
																																																0.41468	0.0496077
																																																0.414925	0.0464631
																																																0.415171	0.0480016
																																																0.415416	0.0485486
																																																0.415661	0.0470408
																																																0.415907	0.0281365
																																																0.416152	0.0136309
																																																0.416397	0.00151502
																																																0.416643	-0.000856797
																																																0.416888	0.0189555
																																																0.417133	0.0352255
																																																0.417379	0.0313108
																																																0.417624	0.0213948
																																																0.41787	0.0147904
																																																0.418115	0.0378911
																																																0.41836	0.0530451
																																																0.418606	0.0453168
																																																0.418851	0.045739
																																																0.419096	0.0560595
																																																0.419342	0.053181
																																																0.419587	0.0473082
																																																0.419832	0.0529996
																																																0.420078	0.0475746
																																																0.420323	0.0361598
																																																0.420568	0.0379105
																																																0.420814	0.0473473
																																																0.421059	0.0413621
																																																0.421304	0.0343786
																																																0.42155	0.0377638
																																																0.421795	0.0514644
																																																0.42204	0.0556119
																																																0.422286	0.0431458
																																																0.422531	0.0371075
																																																0.422776	0.0170538
																																																0.423022	0.0092644
																																																0.423267	0.0219481
																																																0.423512	0.0439692
																																																0.423758	0.0495916
																																																0.424003	0.0451999
																																																0.424248	0.0273205
																																																0.424493	0.0432954
																																																0.424739	0.0525615
																																																0.424984	0.0309233
																																																0.425229	0.0357737
																																																0.425475	0.0306818
																																																0.42572	0.0184594
																																																0.425965	0.0236024
																																																0.426211	0.0313674
																																																0.426456	0.023612
																																																0.426701	0.0369574
																																																0.426947	0.0445206
																																																0.427192	0.0277902
																																																0.427437	0.033032
																																																0.427682	0.0586615
																																																0.427928	0.0590757
																																																0.428173	0.0490347
																																																0.428418	0.0576049
																																																0.428664	0.0685246
																																																0.428909	0.0591357
																																																0.429154	0.0449122
																																																0.429399	0.0376007
																																																0.429645	0.042056
																																																0.42989	0.041786
																																																0.430135	0.0386853
																																																0.430381	0.0370826
																																																0.430626	0.038743
																																																0.430871	0.0285757
																																																0.431116	0.0166685
																																																0.431362	0.0114316
																																																0.431607	0.0148098
																																																0.431852	0.0113742
																																																0.432097	0.02438
																																																0.432343	0.0452849
																																																0.432588	0.0441124
																																																0.432833	0.0299624
																																																0.433079	0.0334302
																																																0.433324	0.0482509
																																																0.433569	0.046085
																																																0.433814	0.0307949
																																																0.43406	0.0162173
																																																0.434305	0.0334586
																																																0.43455	0.0421605
																																																0.434795	0.0408487
																																																0.435041	0.0504302
																																																0.435286	0.0560131
																																																0.435531	0.0381287
																																																0.435776	0.023791
																																																0.436022	0.0234776
																																																0.436267	0.0305013
																																																0.436512	0.0415567
																																																0.436757	0.0413635
																																																0.437003	0.0402622
																																																0.437248	0.0435795
																																																0.437493	0.0442295
																																																0.437738	0.043202
																																																0.437983	0.0383603
																																																0.438229	0.0280639
																																																0.438474	0.0213679
																																																0.438719	0.0523737
																																																0.438964	0.0646902
																																																0.43921	0.0547709
																																																0.439455	0.0510056
																																																0.4397	0.0464733
																																																0.439945	0.0338299
																																																0.44019	0.0242485
																																																0.440436	0.0323155
																																																0.440681	0.047503
																																																0.440926	0.0587592
																																																0.441171	0.0494713
																																																0.441417	0.0327706
																																																0.441662	0.0331271
																																																0.441907	0.0363922
																																																0.442152	0.0369794
																																																0.442397	0.0328323
																																																0.442643	0.0326018
																																																0.442888	0.0293039
																																																0.443133	0.0378738
																																																0.443378	0.0527678
																																																0.443623	0.0425467
																																																0.443869	0.0247772
																																																0.444114	0.0149162
																																																0.444359	0.033542
																																																0.444604	0.0692509
																																																0.444849	0.0645797
																																																0.445095	0.0541542
																																																0.44534	0.0479548
																																																0.445585	0.0435794
																																																0.44583	0.0407048
																																																0.446075	0.0453019
																																																0.44632	0.0474666
																																																0.446566	0.0289371
																																																0.446811	0.0105916
																																																0.447056	0.0131976
																																																0.447301	0.0176372
																																																0.447546	0.0209526
																																																0.447791	0.0285306
																																																0.448037	0.0430468
																																																0.448282	0.0720837
																																																0.448527	0.0800867
																																																0.448772	0.0555167
																																																0.449017	0.0325369
																																																0.449262	0.0490523
																																																0.449508	0.0653356
																																																0.449753	0.0658331
																																																0.449998	0.0612524
																																																0.450243	0.0509008
																																																0.450488	0.0283314
																																																0.450733	0.00739331
																																																0.450979	0.00584731
																																																0.451224	0.0201222
																																																0.451469	0.032527
																																																0.451714	0.0274145
																																																0.451959	0.0326167
																																																0.452204	0.0465717
																																																0.452449	0.0297851
																																																0.452695	0.0283277
																																																0.45294	0.0357719
																																																0.453185	0.0323571
																																																0.45343	0.0192327
																																																0.453675	0.016107
																																																0.45392	0.0320589
																																																0.454165	0.0310122
																																																0.454411	0.0365581
																																																0.454656	0.0486035
																																																0.454901	0.0566757
																																																0.455146	0.0473633
																																																0.455391	0.0336625
																																																0.455636	0.0252662
																																																0.455881	0.0304571
																																																0.456126	0.0314862
																																																0.456371	0.0335332
																																																0.456617	0.0306327
																																																0.456862	0.0224991
																																																0.457107	0.0188462
																																																0.457352	0.0149628
																																																0.457597	0.0321618
																																																0.457842	0.055857
																																																0.458087	0.0642028
																																																0.458332	0.0566554
																																																0.458577	0.0381459
																																																0.458823	0.0319839
																																																0.459068	0.0520086
																																																0.459313	0.0630049
																																																0.459558	0.0446158
																																																0.459803	0.030706
																																																0.460048	0.00934271
																																																0.460293	0.00182433
																																																0.460538	-0.0035324
																																																0.460783	-0.0202084
																																																0.461028	-0.024128
																																																0.461273	-0.00183818
																																																0.461519	0.0077598
																																																0.461764	0.0115695
																																																0.462009	0.0245724
																																																0.462254	0.0323957
																																																0.462499	0.0225921
																																																0.462744	0.0225127
																																																0.462989	0.0278138
																																																0.463234	0.0116877
																																																0.463479	0.0204595
																																																0.463724	0.0330598
																																																0.463969	0.0400304
																																																0.464214	0.0190122
																																																0.464459	0.0153958
																																																0.464705	0.014635
																																																0.46495	0.0213298
																																																0.465195	0.0257269
																																																0.46544	0.0233407
																																																0.465685	0.028508
																																																0.46593	0.0537442
																																																0.466175	0.0369594
																																																0.46642	0.016487
																																																0.466665	0.0112916
																																																0.46691	0.00696775
																																																0.467155	0.00590464
																																																0.4674	0.0116981
																																																0.467645	0.016828
																																																0.46789	0.0225363
																																																0.468135	0.022381
																																																0.46838	0.0125593
																																																0.468625	0.00121821
																																																0.46887	-0.00571357
																																																0.469115	0.000374748
																																																0.46936	-0.0183954
																																																0.469605	-0.0217136
																																																0.46985	0.00793701
																																																0.470095	0.0450195
																																																0.470341	0.0406728
																																																0.470586	0.0275254
																																																0.470831	0.0343092
																																																0.471076	0.0236785
																																																0.471321	0.0320525
																																																0.471566	0.0405657
																																																0.471811	0.059259
																																																0.472056	0.0702157
																																																0.472301	0.0495642
																																																0.472546	0.0235448
																																																0.472791	-0.00379172
																																																0.473036	-0.00557516
																																																0.473281	-0.00921661
																																																0.473526	-0.00882598
																																																0.473771	-0.0040362
																																																0.474016	-0.00839159
																																																0.474261	-0.00853657
																																																0.474506	-0.00321783
																																																0.474751	0.000941485
																																																0.474996	-0.00979679
																																																0.475241	-0.00671821
																																																0.475486	0.00376002
																																																0.475731	-0.000836309
																																																0.475976	0.00452719
																																																0.476221	0.0221016
																																																0.476466	0.0227777
																																																0.476711	0.0266529
																																																0.476956	0.0256115
																																																0.477201	0.0243478
																																																0.477446	0.0339908
																																																0.477691	0.0368528
																																																0.477936	0.0371583
																																																0.47818	0.0341285
																																																0.478425	0.0350777
																																																0.47867	0.0305079
																																																0.478915	0.0173221
																																																0.47916	0.00945023
																																																0.479405	0.0304741
																																																0.47965	0.0529832
																																																0.479895	0.0511267
																																																0.48014	0.028537
																																																0.480385	-0.00862646
																																																0.48063	-0.00406156
																																																0.480875	0.0134908
																																																0.48112	0.0282958
																																																0.481365	0.0186444
																																																0.48161	-0.005785
																																																0.481855	-0.011929
																																																0.4821	0.0166699
																																																0.482345	0.0423463
																																																0.48259	0.0391935
																																																0.482835	0.0234197
																																																0.48308	0.00488963
																																																0.483325	-0.00263748
																																																0.48357	0.00575363
																																																0.483814	0.00372406
																																																0.484059	0.00163226
																																																0.484304	0.016821
																																																0.484549	0.0415192
																																																0.484794	0.0367487
																																																0.485039	0.0178189
																																																0.485284	-0.00730005
																																																0.485529	0.0051135
																																																0.485774	0.0114728
																																																0.486019	0.0209355
																																																0.486264	0.00959706
																																																0.486509	0.00930528
																																																0.486754	0.0217709
																																																0.486998	0.0317734
																																																0.487243	0.0326964
																																																0.487488	0.055299
																																																0.487733	0.0444438
																																																0.487978	0.025908
																																																0.488223	0.0208163
																																																0.488468	0.0240796
																																																0.488713	0.0224012
																																																0.488958	0.00109571
																																																0.489203	-0.00663463
																																																0.489448	0.0280259
																																																0.489692	0.0598305
																																																0.489937	0.044366
																																																0.490182	0.0277037
																																																0.490427	0.0258765
																																																0.490672	0.0280301
[truncated: 304 more rows]
