# Supplementary material for: Influence of counterion type on the scattering of a semiflexible polyelectrolyte
Source: Royal Society of Chemistry journal article supplement (doi:10.1039/d4sm00874j), 2024-01-01
Supplement: d4sm00874j2.pdf [file d4sm00874j2.pdf]

## Supporting Information: Influence of counterion type on the scattering of a semiflexible polyelectrolyte

(Dated: 27 September 2024)

### I. PARTIAL MOLAR VOLUME CALCULATION

The partial molar volume for Lithium carboxymethyl cellulose (LiCMC) was calculated from the density of the 5 g/L aqueous LiCMC solution as follows:

$$\bar{v} = \frac{1}{\rho_s} - \frac{1}{C} \left( \frac{\rho}{\rho_s} - 1 \right) \quad (1)$$

where  $\bar{v}$  is the partial molar volume (PMV),  $C$  is the concentration in g/mL,  $\rho_s$  is the solvent density and  $\rho$  is the solution density.

$$\bar{v} = \frac{1}{0.99705} - \frac{1}{0.005339} \left( \frac{0.999465}{0.99705} - 1 \right)$$

$$v_m = \bar{v} * M_0 \quad (2)$$

where  $v_m$  is the molar volume and  $M_0$  is the mass average molecular mass.

$$v_m(CMC) = v_m(LiCMC) - v_m(Li^+)$$

$$v_m(CMC) = 134.74 - 0.83 = 133.91$$

$$v_m(X^+) = v_m(XCMC) - v_m(CMC) \quad (3)$$

where  $X$  represents the respective counterion. The LiCMC solution density was found to be 0.999465 g/mL and, hence, its PMV ( $\bar{v}$ ) was calculated to be 0.5493 g/cm<sup>3</sup>. The molar volume ( $v_m$ ) was calculated as the product of  $\bar{v}$  and its molar mass (245.29 g/mol).  $v_m$  for Li<sup>+</sup> was taken from the literature to be 0.83 cm<sup>3</sup>/mol. On subtracting this from  $v_m(\text{LiCMC})$  (134.74 cm<sup>3</sup>/mol),  $v_m(\text{CMC})$  was calculated to be 133.91 cm<sup>3</sup>/mol. This was used to calculate the  $v_m$  for each counterion by subtracting it from the  $v_m$  for the respective salt for CMC.

### II. LOW-Q UPTURN EXPONENTS

Table ST1 lists the low-q upturn exponents for the various CMC salts in D<sub>2</sub>O at different concentrations determined as shown in figure 5 in the main text.

### III. BASES USED FOR CMC PREPARATION

| PE     | $c$ [mol/L] | Exponent (m) |
|--------|-------------|--------------|
| TBACMC | 0.15        | -3.6         |
| TBACMC | 0.11        | -3.5         |
| TBACMC | 0.074       | -4.0         |
| TBACMC | 0.05        | -3.5         |
| TBACMC | 0.033       | -3.5         |
| TEACMC | 0.15        | -3.4         |
| TEACMC | 0.11        | -3.4         |
| TEACMC | 0.074       | -2.8         |
| TEACMC | 0.05        | -2.8         |
| TEACMC | 0.033       | -2.3         |
| TMACMC | 0.15        | -3.5         |
| TMACMC | 0.11        | -3.4         |
| TMACMC | 0.075       | -3.1         |
| TMACMC | 0.05        | -3.0         |
| TMACMC | 0.033       | -2.2         |
| NaCMC  | 0.11        | -2.5         |
| NaCMC  | 0.18        | -4.3         |

TABLE ST1. Low- $q$  upturn exponents for the different CMC salts in  $D_2O$ .

| Base  | Grade/Purity      | Notes              |
|-------|-------------------|--------------------|
| LiOH  | 99.95%            | Trace Metals basis |
| KOH   | 8.0 M             | by HCl titration   |
| CsOH  | 99.9%             | Trace Metals basis |
| TMAOH | 25 wt.% in $H_2O$ | Quality Level 200  |
| TEAOH | 35 wt.% in $H_2O$ | Quality Level 100  |
| TBAOH | 20 wt.% in $H_2O$ | Quality Level 100  |

TABLE ST2. Bases used for the preparation of CMC salts

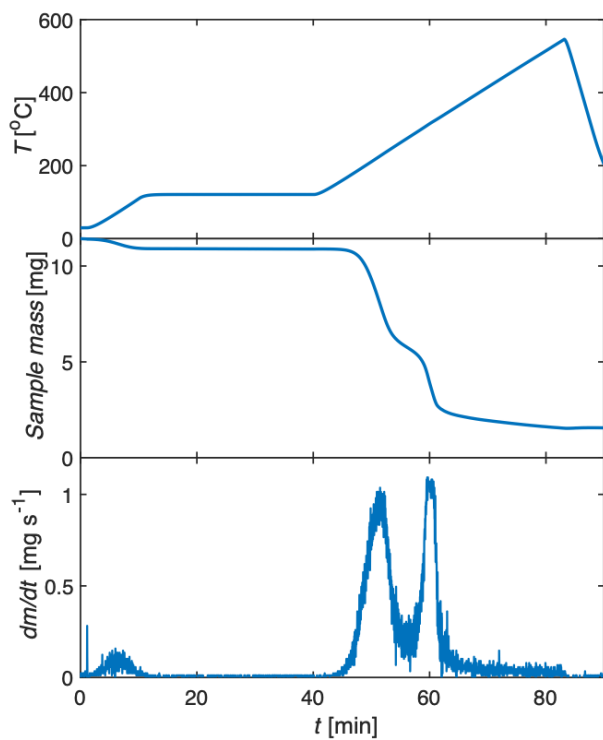

FIG. S1. Thermogravimetric analysis for tetrabutylammonium carboxymethyl cellulose (TBACMC) under  $N_2$

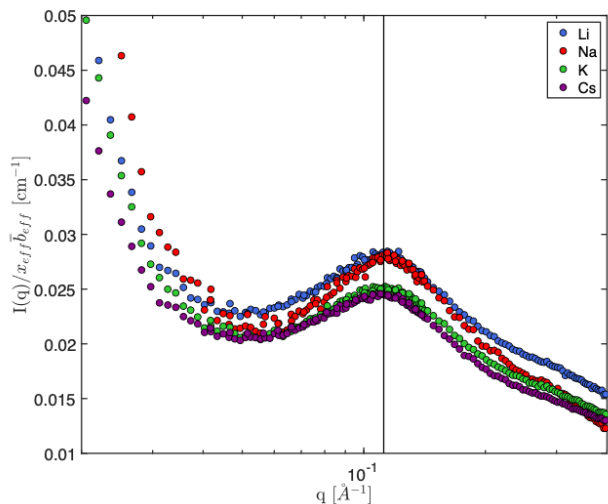

FIG. S2. Background subtracted SANS scattering intensity (normalized by the respective effective contrasts) as a function of scattering wavevector  $q$  for alkaline salts of CMC in salt-free  $D_2O$ , see legend for colour scheme at  $c = 0.15$  mol/L. The line indicates the peak positions ( $q^* = 0.112 \text{ \AA}^{-1}$ ).

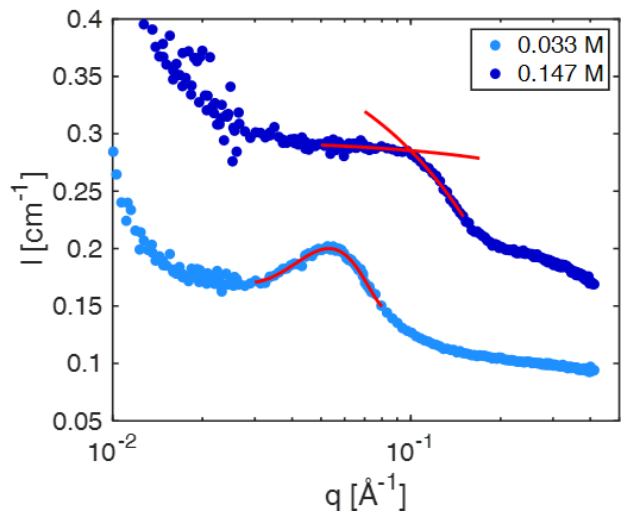

FIG. S3. Representative plot to illustrate the fitting methods used to determine the peak/shoulder position from scattering intensity vs wavevector  $q$  curves. This plot shows the scattering curves for TBACMC in  $D_2O$ . At  $c = 0.033$  M, a polynomial fit has been used to fit a distinct peak to determine the correlation peak position ( $q^*$ ). At  $c = 0.147$ ,  $q^*$  has been determined from the crossover point of the two linear curves fit to either side of the shoulder.

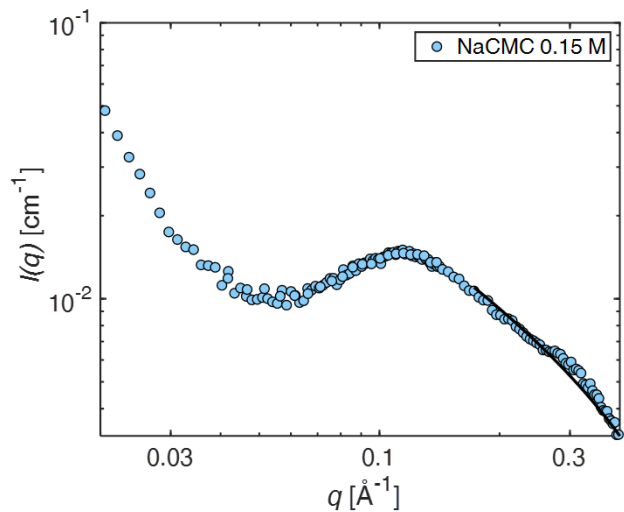

FIG. S4. Representative plot to illustrate the fit to equation 8 of the main text to the high- $q$  region ( $q \geq 1.5q^*$ ) of the non-background subtracted scattering intensity vs wavevector  $q$  curves. This fit (solid black line) is used to determine the factor  $I_{Bck}$ , which is then subtracted from the total scattering intensities at each wavevector to compute the background subtracted scattering curves. This plot shows the scattering curves for NaCMC in  $D_2O$  at  $c = 0.15$  M
